# Supplementary material for: GAMBIT (Genomic Approximation Method for Bacterial Identification and Tracking): A methodology to rapidly leverage whole genome sequencing of bacterial isolates for clinical identification
Source: PLoS One. 2023 Feb 16;18(2):e0277575. doi: 10.1371/journal.pone.0277575 (PMC9934365; doi:10.1371/journal.pone.0277575)
Supplement: S5 Table — (XLSX) [file pone.0277575.s007.xlsx]

## Sheet: Sheet1
accession	organism	genus_name	genus_ncbi_id	species_name	species_ncbi_id	genus_only	species_only
GCF_000379545.1	Acetobacter aceti	Acetobacter	434	Acetobacter aceti	435	Acetobacter	aceti
GCF_000193495.1	Acetobacter aceti	Acetobacter	434	Acetobacter aceti	435	Acetobacter	aceti
GCF_000963905.1	Acetobacter aceti	Acetobacter	434	Acetobacter aceti	435	Acetobacter	aceti
GCF_001580535.1	Acetobacter cerevisiae	Acetobacter	434	Acetobacter cerevisiae	178900	Acetobacter	cerevisiae
GCF_001581105.1	Acetobacter cerevisiae	Acetobacter	434	Acetobacter cerevisiae	178900	Acetobacter	cerevisiae
GCF_001581075.1	Acetobacter cerevisiae	Acetobacter	434	Acetobacter cerevisiae	178900	Acetobacter	cerevisiae
GCF_000964205.1	Acetobacter orleanensis	Acetobacter	434	Acetobacter orleanensis	104099	Acetobacter	orleanensis
GCF_001581005.1	Acetobacter orleanensis	Acetobacter	434	Acetobacter orleanensis	104099	Acetobacter	orleanensis
GCF_000285275.1	Acetobacter pasteurianus	Acetobacter	434	Acetobacter pasteurianus	438	Acetobacter	pasteurianus
GCF_000010825.1	Acetobacter pasteurianus	Acetobacter	434	Acetobacter pasteurianus	438	Acetobacter	pasteurianus
GCF_000010945.1	Acetobacter pasteurianus	Acetobacter	434	Acetobacter pasteurianus	438	Acetobacter	pasteurianus
GCF_000241585.2	Acetobacter pasteurianus	Acetobacter	434	Acetobacter pasteurianus	438	Acetobacter	pasteurianus
GCF_000723785.2	Acetobacter pasteurianus	Acetobacter	434	Acetobacter pasteurianus	438	Acetobacter	pasteurianus
GCF_000241625.1	Acetobacter pasteurianus	Acetobacter	434	Acetobacter pasteurianus	438	Acetobacter	pasteurianus
GCF_000193245.1	Acetobacter pomorum	Acetobacter	434	Acetobacter pomorum	65959	Acetobacter	pomorum
GCF_000755675.1	Acetobacter pomorum	Acetobacter	434	Acetobacter pomorum	65959	Acetobacter	pomorum
GCF_000755665.1	Acetobacter tropicalis	Acetobacter	434	Acetobacter tropicalis	104102	Acetobacter	tropicalis
GCF_001580945.1	Acetobacter tropicalis	Acetobacter	434	Acetobacter tropicalis	104102	Acetobacter	tropicalis
GCF_000787635.2	Acetobacter tropicalis	Acetobacter	434	Acetobacter tropicalis	104102	Acetobacter	tropicalis
GCF_001580915.1	Acetobacter tropicalis	Acetobacter	434	Acetobacter tropicalis	104102	Acetobacter	tropicalis
GCF_000164035.1	Achromobacter piechaudii	Achromobacter	222	Achromobacter piechaudii	72556	Achromobacter	piechaudii
GCF_001262515.1	Achromobacter piechaudii	Achromobacter	222	Achromobacter piechaudii	72556	Achromobacter	piechaudii
GCF_001571245.1	Achromobacter piechaudii	Achromobacter	222	Achromobacter piechaudii	72556	Achromobacter	piechaudii
GCF_000758265.1	Achromobacter xylosoxidans	Achromobacter	222	Achromobacter xylosoxidans	85698	Achromobacter	xylosoxidans
GCF_001038045.1	Achromobacter xylosoxidans	Achromobacter	222	Achromobacter xylosoxidans	85698	Achromobacter	xylosoxidans
GCF_001276005.1	Achromobacter xylosoxidans	Achromobacter	222	Achromobacter xylosoxidans	85698	Achromobacter	xylosoxidans
GCF_000967095.2	Achromobacter xylosoxidans	Achromobacter	222	Achromobacter xylosoxidans	85698	Achromobacter	xylosoxidans
GCF_001276025.1	Achromobacter xylosoxidans	Achromobacter	222	Achromobacter xylosoxidans	85698	Achromobacter	xylosoxidans
GCF_001276315.1	Achromobacter xylosoxidans	Achromobacter	222	Achromobacter xylosoxidans	85698	Achromobacter	xylosoxidans
GCF_001275865.1	Achromobacter xylosoxidans	Achromobacter	222	Achromobacter xylosoxidans	85698	Achromobacter	xylosoxidans
GCF_001276035.1	Achromobacter xylosoxidans	Achromobacter	222	Achromobacter xylosoxidans	85698	Achromobacter	xylosoxidans
GCF_001471535.1	Achromobacter xylosoxidans	Achromobacter	222	Achromobacter xylosoxidans	85698	Achromobacter	xylosoxidans
GCF_000517225.1	Achromobacter xylosoxidans	Achromobacter	222	Achromobacter xylosoxidans	85698	Achromobacter	xylosoxidans
GCF_001598595.1	Achromobacter xylosoxidans	Achromobacter	222	Achromobacter xylosoxidans	85698	Achromobacter	xylosoxidans
GCF_001057595.1	Achromobacter xylosoxidans	Achromobacter	222	Achromobacter xylosoxidans	85698	Achromobacter	xylosoxidans
GCF_001457475.1	Achromobacter xylosoxidans	Achromobacter	222	Achromobacter xylosoxidans	85698	Achromobacter	xylosoxidans
GCF_001541435.1	Achromobacter xylosoxidans	Achromobacter	222	Achromobacter xylosoxidans	85698	Achromobacter	xylosoxidans
GCF_001275845.1	Achromobacter xylosoxidans	Achromobacter	222	Achromobacter xylosoxidans	85698	Achromobacter	xylosoxidans
GCF_000186185.1	Achromobacter xylosoxidans	Achromobacter	222	Achromobacter xylosoxidans	85698	Achromobacter	xylosoxidans
GCF_001275875.1	Achromobacter xylosoxidans	Achromobacter	222	Achromobacter xylosoxidans	85698	Achromobacter	xylosoxidans
GCF_001057605.1	Achromobacter xylosoxidans	Achromobacter	222	Achromobacter xylosoxidans	85698	Achromobacter	xylosoxidans
GCF_000230275.1	Acidaminococcus intestini	Acidaminococcus	904	Acidaminococcus intestini	187327	Acidaminococcus	intestini
GCF_000425045.1	Acidaminococcus intestini	Acidaminococcus	904	Acidaminococcus intestini	187327	Acidaminococcus	intestini
GCF_000202835.1	Acidiphilium multivorum	Acidiphilium	522	Acidiphilium multivorum	62140	Acidiphilium	multivorum
GCF_000964345.1	Acidiphilium multivorum	Acidiphilium	522	Acidiphilium multivorum	62140	Acidiphilium	multivorum
GCF_001441165.1	Acidipropionibacterium acidipropionici	Acidipropionibacterium	1912215	Acidipropionibacterium acidipropionici	1748	Acidipropionibacterium	acidipropionici
GCF_000427845.1	Acidipropionibacterium acidipropionici	Acidipropionibacterium	1912215	Acidipropionibacterium acidipropionici	1748	Acidipropionibacterium	acidipropionici
GCF_000310065.1	Acidipropionibacterium acidipropionici	Acidipropionibacterium	1912215	Acidipropionibacterium acidipropionici	1748	Acidipropionibacterium	acidipropionici
GCF_001602115.1	Acidipropionibacterium acidipropionici	Acidipropionibacterium	1912215	Acidipropionibacterium acidipropionici	1748	Acidipropionibacterium	acidipropionici
GCF_000175575.2	Acidithiobacillus caldus	Acidithiobacillus	119977	Acidithiobacillus caldus	33059	Acidithiobacillus	caldus
GCF_000221025.1	Acidithiobacillus caldus	Acidithiobacillus	119977	Acidithiobacillus caldus	33059	Acidithiobacillus	caldus
GCF_000750615.1	Acidithiobacillus ferrivorans	Acidithiobacillus	119977	Acidithiobacillus ferrivorans	160808	Acidithiobacillus	ferrivorans
GCF_000214095.2	Acidithiobacillus ferrivorans	Acidithiobacillus	119977	Acidithiobacillus ferrivorans	160808	Acidithiobacillus	ferrivorans
GCF_000020825.1	Acidithiobacillus ferrooxidans	Acidithiobacillus	119977	Acidithiobacillus ferrooxidans	920	Acidithiobacillus	ferrooxidans
GCF_000021485.1	Acidithiobacillus ferrooxidans	Acidithiobacillus	119977	Acidithiobacillus ferrooxidans	920	Acidithiobacillus	ferrooxidans
GCF_001418795.1	Acidithiobacillus ferrooxidans	Acidithiobacillus	119977	Acidithiobacillus ferrooxidans	920	Acidithiobacillus	ferrooxidans
GCF_001559335.1	Acidithiobacillus ferrooxidans	Acidithiobacillus	119977	Acidithiobacillus ferrooxidans	920	Acidithiobacillus	ferrooxidans
GCF_000559045.1	Acidithiobacillus thiooxidans	Acidithiobacillus	119977	Acidithiobacillus thiooxidans	930	Acidithiobacillus	thiooxidans
GCF_000227215.1	Acidithiobacillus thiooxidans	Acidithiobacillus	119977	Acidithiobacillus thiooxidans	930	Acidithiobacillus	thiooxidans
GCF_000709715.1	Acidithiobacillus thiooxidans	Acidithiobacillus	119977	Acidithiobacillus thiooxidans	930	Acidithiobacillus	thiooxidans
GCF_000176855.2	Acidovorax avenae	Acidovorax	12916	Acidovorax avenae	80867	Acidovorax	avenae
GCF_001282395.1	Acidovorax avenae	Acidovorax	12916	Acidovorax avenae	80867	Acidovorax	avenae
GCF_000968215.1	Acidovorax citrulli	Acidovorax	12916	Acidovorax citrulli	80869	Acidovorax	citrulli
GCF_001593665.1	Acidovorax citrulli	Acidovorax	12916	Acidovorax citrulli	80869	Acidovorax	citrulli
GCF_000948135.1	Acidovorax citrulli	Acidovorax	12916	Acidovorax citrulli	80869	Acidovorax	citrulli
GCF_000015325.1	Acidovorax citrulli	Acidovorax	12916	Acidovorax citrulli	80869	Acidovorax	citrulli
GCF_000204215.1	Acidovorax radicis	Acidovorax	12916	Acidovorax radicis	758826	Acidovorax	radicis
GCF_000204195.1	Acidovorax radicis	Acidovorax	12916	Acidovorax radicis	758826	Acidovorax	radicis
GCF_001576615.1	Acinetobacter baumannii	Acinetobacter	469	Acinetobacter baumannii	470	Acinetobacter	baumannii
GCF_000600495.1	Acinetobacter baumannii	Acinetobacter	469	Acinetobacter baumannii	470	Acinetobacter	baumannii
GCF_000588495.1	Acinetobacter baumannii	Acinetobacter	469	Acinetobacter baumannii	470	Acinetobacter	baumannii
GCF_000810465.3	Acinetobacter baumannii	Acinetobacter	469	Acinetobacter baumannii	470	Acinetobacter	baumannii
GCF_001531265.1	Acinetobacter baumannii	Acinetobacter	469	Acinetobacter baumannii	470	Acinetobacter	baumannii
GCF_000222265.1	Acinetobacter baumannii	Acinetobacter	469	Acinetobacter baumannii	470	Acinetobacter	baumannii
GCF_001573065.1	Acinetobacter baumannii	Acinetobacter	469	Acinetobacter baumannii	470	Acinetobacter	baumannii
GCF_000682575.1	Acinetobacter baumannii	Acinetobacter	469	Acinetobacter baumannii	470	Acinetobacter	baumannii
GCF_001541035.1	Acinetobacter baumannii	Acinetobacter	469	Acinetobacter baumannii	470	Acinetobacter	baumannii
GCF_000723075.1	Acinetobacter baumannii	Acinetobacter	469	Acinetobacter baumannii	470	Acinetobacter	baumannii
GCF_000581555.1	Acinetobacter baumannii	Acinetobacter	469	Acinetobacter baumannii	470	Acinetobacter	baumannii
GCF_000516355.2	Acinetobacter baumannii	Acinetobacter	469	Acinetobacter baumannii	470	Acinetobacter	baumannii
GCF_000787215.1	Acinetobacter baumannii	Acinetobacter	469	Acinetobacter baumannii	470	Acinetobacter	baumannii
GCF_000592375.1	Acinetobacter baumannii	Acinetobacter	469	Acinetobacter baumannii	470	Acinetobacter	baumannii
GCF_000828935.1	Acinetobacter baumannii	Acinetobacter	469	Acinetobacter baumannii	470	Acinetobacter	baumannii
GCF_000939485.1	Acinetobacter baumannii	Acinetobacter	469	Acinetobacter baumannii	470	Acinetobacter	baumannii
GCF_000516235.1	Acinetobacter baumannii	Acinetobacter	469	Acinetobacter baumannii	470	Acinetobacter	baumannii
GCF_000581695.1	Acinetobacter baumannii	Acinetobacter	469	Acinetobacter baumannii	470	Acinetobacter	baumannii
GCF_001432455.1	Acinetobacter baumannii	Acinetobacter	469	Acinetobacter baumannii	470	Acinetobacter	baumannii
GCF_000581955.1	Acinetobacter baumannii	Acinetobacter	469	Acinetobacter baumannii	470	Acinetobacter	baumannii
GCF_000301335.1	Acinetobacter baumannii	Acinetobacter	469	Acinetobacter baumannii	470	Acinetobacter	baumannii
GCF_001415735.1	Acinetobacter baumannii	Acinetobacter	469	Acinetobacter baumannii	470	Acinetobacter	baumannii
GCF_000600515.1	Acinetobacter baumannii	Acinetobacter	469	Acinetobacter baumannii	470	Acinetobacter	baumannii
GCF_000584475.1	Acinetobacter baumannii	Acinetobacter	469	Acinetobacter baumannii	470	Acinetobacter	baumannii
GCF_000581395.1	Acinetobacter baumannii	Acinetobacter	469	Acinetobacter baumannii	470	Acinetobacter	baumannii
GCF_000301835.1	Acinetobacter baumannii	Acinetobacter	469	Acinetobacter baumannii	470	Acinetobacter	baumannii
GCF_000972525.1	Acinetobacter baumannii	Acinetobacter	469	Acinetobacter baumannii	470	Acinetobacter	baumannii
GCF_000341985.1	Acinetobacter baumannii	Acinetobacter	469	Acinetobacter baumannii	470	Acinetobacter	baumannii
GCF_000369165.1	Acinetobacter baumannii	Acinetobacter	469	Acinetobacter baumannii	470	Acinetobacter	baumannii
GCF_000949185.2	Acinetobacter baumannii	Acinetobacter	469	Acinetobacter baumannii	470	Acinetobacter	baumannii
GCF_000681655.1	Acinetobacter baumannii	Acinetobacter	469	Acinetobacter baumannii	470	Acinetobacter	baumannii
GCF_000804885.1	Acinetobacter baumannii	Acinetobacter	469	Acinetobacter baumannii	470	Acinetobacter	baumannii
GCF_000627575.1	Acinetobacter baumannii	Acinetobacter	469	Acinetobacter baumannii	470	Acinetobacter	baumannii
GCF_000804795.1	Acinetobacter baumannii	Acinetobacter	469	Acinetobacter baumannii	470	Acinetobacter	baumannii
GCF_001541695.1	Acinetobacter baumannii	Acinetobacter	469	Acinetobacter baumannii	470	Acinetobacter	baumannii
GCF_000222285.1	Acinetobacter baumannii	Acinetobacter	469	Acinetobacter baumannii	470	Acinetobacter	baumannii
GCF_000453345.1	Acinetobacter baumannii	Acinetobacter	469	Acinetobacter baumannii	470	Acinetobacter	baumannii
GCF_000335655.1	Acinetobacter baumannii	Acinetobacter	469	Acinetobacter baumannii	470	Acinetobacter	baumannii
GCF_001416655.1	Acinetobacter baumannii	Acinetobacter	469	Acinetobacter baumannii	470	Acinetobacter	baumannii
GCF_000583475.1	Acinetobacter baumannii	Acinetobacter	469	Acinetobacter baumannii	470	Acinetobacter	baumannii
GCF_001517645.1	Acinetobacter baumannii	Acinetobacter	469	Acinetobacter baumannii	470	Acinetobacter	baumannii
GCF_001415595.1	Acinetobacter baumannii	Acinetobacter	469	Acinetobacter baumannii	470	Acinetobacter	baumannii
GCF_000809005.3	Acinetobacter baumannii	Acinetobacter	469	Acinetobacter baumannii	470	Acinetobacter	baumannii
GCF_000592675.1	Acinetobacter baumannii	Acinetobacter	469	Acinetobacter baumannii	470	Acinetobacter	baumannii
GCF_000949035.2	Acinetobacter baumannii	Acinetobacter	469	Acinetobacter baumannii	470	Acinetobacter	baumannii
GCF_000582115.1	Acinetobacter baumannii	Acinetobacter	469	Acinetobacter baumannii	470	Acinetobacter	baumannii
GCF_000580315.1	Acinetobacter baumannii	Acinetobacter	469	Acinetobacter baumannii	470	Acinetobacter	baumannii
GCF_000592195.1	Acinetobacter baumannii	Acinetobacter	469	Acinetobacter baumannii	470	Acinetobacter	baumannii
GCF_000787275.1	Acinetobacter baumannii	Acinetobacter	469	Acinetobacter baumannii	470	Acinetobacter	baumannii
GCF_000302215.1	Acinetobacter baumannii	Acinetobacter	469	Acinetobacter baumannii	470	Acinetobacter	baumannii
GCF_001543995.1	Acinetobacter baumannii	Acinetobacter	469	Acinetobacter baumannii	470	Acinetobacter	baumannii
GCF_000682595.1	Acinetobacter baumannii	Acinetobacter	469	Acinetobacter baumannii	470	Acinetobacter	baumannii
GCF_000592335.1	Acinetobacter baumannii	Acinetobacter	469	Acinetobacter baumannii	470	Acinetobacter	baumannii
GCF_000589415.1	Acinetobacter baumannii	Acinetobacter	469	Acinetobacter baumannii	470	Acinetobacter	baumannii
GCF_000584335.1	Acinetobacter baumannii	Acinetobacter	469	Acinetobacter baumannii	470	Acinetobacter	baumannii
GCF_000589035.1	Acinetobacter baumannii	Acinetobacter	469	Acinetobacter baumannii	470	Acinetobacter	baumannii
GCF_000835995.1	Acinetobacter baumannii	Acinetobacter	469	Acinetobacter baumannii	470	Acinetobacter	baumannii
GCF_000584275.1	Acinetobacter baumannii	Acinetobacter	469	Acinetobacter baumannii	470	Acinetobacter	baumannii
GCF_000600695.1	Acinetobacter baumannii	Acinetobacter	469	Acinetobacter baumannii	470	Acinetobacter	baumannii
GCF_000810025.3	Acinetobacter baumannii	Acinetobacter	469	Acinetobacter baumannii	470	Acinetobacter	baumannii
GCF_001414815.1	Acinetobacter baumannii	Acinetobacter	469	Acinetobacter baumannii	470	Acinetobacter	baumannii
GCF_001432865.1	Acinetobacter baumannii	Acinetobacter	469	Acinetobacter baumannii	470	Acinetobacter	baumannii
GCF_000584755.1	Acinetobacter baumannii	Acinetobacter	469	Acinetobacter baumannii	470	Acinetobacter	baumannii
GCF_001433015.1	Acinetobacter baumannii	Acinetobacter	469	Acinetobacter baumannii	470	Acinetobacter	baumannii
GCF_000770605.1	Acinetobacter baumannii	Acinetobacter	469	Acinetobacter baumannii	470	Acinetobacter	baumannii
GCF_000354035.1	Acinetobacter baumannii	Acinetobacter	469	Acinetobacter baumannii	470	Acinetobacter	baumannii
GCF_000770865.1	Acinetobacter baumannii	Acinetobacter	469	Acinetobacter baumannii	470	Acinetobacter	baumannii
GCF_001433695.1	Acinetobacter baumannii	Acinetobacter	469	Acinetobacter baumannii	470	Acinetobacter	baumannii
GCF_001444255.1	Acinetobacter baumannii	Acinetobacter	469	Acinetobacter baumannii	470	Acinetobacter	baumannii
GCF_000589635.1	Acinetobacter baumannii	Acinetobacter	469	Acinetobacter baumannii	470	Acinetobacter	baumannii
GCF_000805615.1	Acinetobacter baumannii	Acinetobacter	469	Acinetobacter baumannii	470	Acinetobacter	baumannii
GCF_000301255.1	Acinetobacter baumannii	Acinetobacter	469	Acinetobacter baumannii	470	Acinetobacter	baumannii
GCF_000580935.1	Acinetobacter baumannii	Acinetobacter	469	Acinetobacter baumannii	470	Acinetobacter	baumannii
GCF_000611525.1	Acinetobacter baumannii	Acinetobacter	469	Acinetobacter baumannii	470	Acinetobacter	baumannii
GCF_000972625.1	Acinetobacter baumannii	Acinetobacter	469	Acinetobacter baumannii	470	Acinetobacter	baumannii
GCF_000584435.1	Acinetobacter baumannii	Acinetobacter	469	Acinetobacter baumannii	470	Acinetobacter	baumannii
GCF_000809045.3	Acinetobacter baumannii	Acinetobacter	469	Acinetobacter baumannii	470	Acinetobacter	baumannii
GCF_000301455.1	Acinetobacter baumannii	Acinetobacter	469	Acinetobacter baumannii	470	Acinetobacter	baumannii
GCF_000766105.1	Acinetobacter baumannii	Acinetobacter	469	Acinetobacter baumannii	470	Acinetobacter	baumannii
GCF_000368185.1	Acinetobacter baumannii	Acinetobacter	469	Acinetobacter baumannii	470	Acinetobacter	baumannii
GCF_000515575.1	Acinetobacter baumannii	Acinetobacter	469	Acinetobacter baumannii	470	Acinetobacter	baumannii
GCF_001415695.1	Acinetobacter baumannii	Acinetobacter	469	Acinetobacter baumannii	470	Acinetobacter	baumannii
GCF_000805125.1	Acinetobacter baumannii	Acinetobacter	469	Acinetobacter baumannii	470	Acinetobacter	baumannii
GCF_001512075.1	Acinetobacter baumannii	Acinetobacter	469	Acinetobacter baumannii	470	Acinetobacter	baumannii
GCF_000453945.1	Acinetobacter baumannii	Acinetobacter	469	Acinetobacter baumannii	470	Acinetobacter	baumannii
GCF_000592715.1	Acinetobacter baumannii	Acinetobacter	469	Acinetobacter baumannii	470	Acinetobacter	baumannii
GCF_000809085.3	Acinetobacter baumannii	Acinetobacter	469	Acinetobacter baumannii	470	Acinetobacter	baumannii
GCF_001414575.1	Acinetobacter baumannii	Acinetobacter	469	Acinetobacter baumannii	470	Acinetobacter	baumannii
GCF_000809985.3	Acinetobacter baumannii	Acinetobacter	469	Acinetobacter baumannii	470	Acinetobacter	baumannii
GCF_001511915.1	Acinetobacter baumannii	Acinetobacter	469	Acinetobacter baumannii	470	Acinetobacter	baumannii
GCF_000581655.1	Acinetobacter baumannii	Acinetobacter	469	Acinetobacter baumannii	470	Acinetobacter	baumannii
GCF_000515975.1	Acinetobacter baumannii	Acinetobacter	469	Acinetobacter baumannii	470	Acinetobacter	baumannii
GCF_000805275.1	Acinetobacter baumannii	Acinetobacter	469	Acinetobacter baumannii	470	Acinetobacter	baumannii
GCF_000584395.1	Acinetobacter baumannii	Acinetobacter	469	Acinetobacter baumannii	470	Acinetobacter	baumannii
GCF_000809225.3	Acinetobacter baumannii	Acinetobacter	469	Acinetobacter baumannii	470	Acinetobacter	baumannii
GCF_000335635.1	Acinetobacter baumannii	Acinetobacter	469	Acinetobacter baumannii	470	Acinetobacter	baumannii
GCF_001512195.1	Acinetobacter baumannii	Acinetobacter	469	Acinetobacter baumannii	470	Acinetobacter	baumannii
GCF_001544395.1	Acinetobacter baumannii	Acinetobacter	469	Acinetobacter baumannii	470	Acinetobacter	baumannii
GCF_001471855.1	Acinetobacter baumannii	Acinetobacter	469	Acinetobacter baumannii	470	Acinetobacter	baumannii
GCF_000493615.1	Acinetobacter baumannii	Acinetobacter	469	Acinetobacter baumannii	470	Acinetobacter	baumannii
GCF_001432825.1	Acinetobacter baumannii	Acinetobacter	469	Acinetobacter baumannii	470	Acinetobacter	baumannii
GCF_000305295.1	Acinetobacter baumannii	Acinetobacter	469	Acinetobacter baumannii	470	Acinetobacter	baumannii
GCF_000810085.3	Acinetobacter baumannii	Acinetobacter	469	Acinetobacter baumannii	470	Acinetobacter	baumannii
GCF_000809545.3	Acinetobacter baumannii	Acinetobacter	469	Acinetobacter baumannii	470	Acinetobacter	baumannii
GCF_000592495.1	Acinetobacter baumannii	Acinetobacter	469	Acinetobacter baumannii	470	Acinetobacter	baumannii
GCF_001415095.1	Acinetobacter baumannii	Acinetobacter	469	Acinetobacter baumannii	470	Acinetobacter	baumannii
GCF_000580815.1	Acinetobacter baumannii	Acinetobacter	469	Acinetobacter baumannii	470	Acinetobacter	baumannii
GCF_001541025.1	Acinetobacter baumannii	Acinetobacter	469	Acinetobacter baumannii	470	Acinetobacter	baumannii
GCF_000611065.1	Acinetobacter baumannii	Acinetobacter	469	Acinetobacter baumannii	470	Acinetobacter	baumannii
GCF_000810905.3	Acinetobacter baumannii	Acinetobacter	469	Acinetobacter baumannii	470	Acinetobacter	baumannii
GCF_000301315.1	Acinetobacter baumannii	Acinetobacter	469	Acinetobacter baumannii	470	Acinetobacter	baumannii
GCF_000671695.1	Acinetobacter baumannii	Acinetobacter	469	Acinetobacter baumannii	470	Acinetobacter	baumannii
GCF_000804735.1	Acinetobacter baumannii	Acinetobacter	469	Acinetobacter baumannii	470	Acinetobacter	baumannii
GCF_000584355.1	Acinetobacter baumannii	Acinetobacter	469	Acinetobacter baumannii	470	Acinetobacter	baumannii
GCF_000770885.1	Acinetobacter baumannii	Acinetobacter	469	Acinetobacter baumannii	470	Acinetobacter	baumannii
GCF_000580715.1	Acinetobacter baumannii	Acinetobacter	469	Acinetobacter baumannii	470	Acinetobacter	baumannii
GCF_000453865.1	Acinetobacter baumannii	Acinetobacter	469	Acinetobacter baumannii	470	Acinetobacter	baumannii
GCF_000811785.3	Acinetobacter baumannii	Acinetobacter	469	Acinetobacter baumannii	470	Acinetobacter	baumannii
GCF_000695855.2	Acinetobacter baumannii	Acinetobacter	469	Acinetobacter baumannii	470	Acinetobacter	baumannii
GCF_000588195.1	Acinetobacter baumannii	Acinetobacter	469	Acinetobacter baumannii	470	Acinetobacter	baumannii
GCF_000588455.1	Acinetobacter baumannii	Acinetobacter	469	Acinetobacter baumannii	470	Acinetobacter	baumannii
GCF_001416035.1	Acinetobacter baumannii	Acinetobacter	469	Acinetobacter baumannii	470	Acinetobacter	baumannii
GCF_000453745.1	Acinetobacter baumannii	Acinetobacter	469	Acinetobacter baumannii	470	Acinetobacter	baumannii
GCF_000775835.1	Acinetobacter baumannii	Acinetobacter	469	Acinetobacter baumannii	470	Acinetobacter	baumannii
GCF_000939615.1	Acinetobacter baumannii	Acinetobacter	469	Acinetobacter baumannii	470	Acinetobacter	baumannii
GCF_000591755.1	Acinetobacter baumannii	Acinetobacter	469	Acinetobacter baumannii	470	Acinetobacter	baumannii
GCF_000809465.3	Acinetobacter baumannii	Acinetobacter	469	Acinetobacter baumannii	470	Acinetobacter	baumannii
GCF_001007745.1	Acinetobacter baumannii	Acinetobacter	469	Acinetobacter baumannii	470	Acinetobacter	baumannii
GCF_000226275.1	Acinetobacter baumannii	Acinetobacter	469	Acinetobacter baumannii	470	Acinetobacter	baumannii
GCF_000805195.1	Acinetobacter baumannii	Acinetobacter	469	Acinetobacter baumannii	470	Acinetobacter	baumannii
GCF_001416425.1	Acinetobacter baumannii	Acinetobacter	469	Acinetobacter baumannii	470	Acinetobacter	baumannii
GCF_001541045.1	Acinetobacter baumannii	Acinetobacter	469	Acinetobacter baumannii	470	Acinetobacter	baumannii
GCF_000811065.3	Acinetobacter baumannii	Acinetobacter	469	Acinetobacter baumannii	470	Acinetobacter	baumannii
GCF_001541775.1	Acinetobacter baumannii	Acinetobacter	469	Acinetobacter baumannii	470	Acinetobacter	baumannii
GCF_000580355.1	Acinetobacter baumannii	Acinetobacter	469	Acinetobacter baumannii	470	Acinetobacter	baumannii
GCF_000588735.1	Acinetobacter baumannii	Acinetobacter	469	Acinetobacter baumannii	470	Acinetobacter	baumannii
GCF_000804655.1	Acinetobacter baumannii	Acinetobacter	469	Acinetobacter baumannii	470	Acinetobacter	baumannii
GCF_000305275.1	Acinetobacter baumannii	Acinetobacter	469	Acinetobacter baumannii	470	Acinetobacter	baumannii
GCF_000682535.1	Acinetobacter baumannii	Acinetobacter	469	Acinetobacter baumannii	470	Acinetobacter	baumannii
GCF_000939475.1	Acinetobacter baumannii	Acinetobacter	469	Acinetobacter baumannii	470	Acinetobacter	baumannii
GCF_000515635.1	Acinetobacter baumannii	Acinetobacter	469	Acinetobacter baumannii	470	Acinetobacter	baumannii
GCF_000335595.1	Acinetobacter baumannii	Acinetobacter	469	Acinetobacter baumannii	470	Acinetobacter	baumannii
GCF_001512155.1	Acinetobacter baumannii	Acinetobacter	469	Acinetobacter baumannii	470	Acinetobacter	baumannii
GCF_000516135.1	Acinetobacter baumannii	Acinetobacter	469	Acinetobacter baumannii	470	Acinetobacter	baumannii
GCF_000809945.1	Acinetobacter baumannii	Acinetobacter	469	Acinetobacter baumannii	470	Acinetobacter	baumannii
GCF_001432445.1	Acinetobacter baumannii	Acinetobacter	469	Acinetobacter baumannii	470	Acinetobacter	baumannii
GCF_000811165.3	Acinetobacter baumannii	Acinetobacter	469	Acinetobacter baumannii	470	Acinetobacter	baumannii
GCF_001433075.1	Acinetobacter baumannii	Acinetobacter	469	Acinetobacter baumannii	470	Acinetobacter	baumannii
GCF_000811005.3	Acinetobacter baumannii	Acinetobacter	469	Acinetobacter baumannii	470	Acinetobacter	baumannii
GCF_000580275.1	Acinetobacter baumannii	Acinetobacter	469	Acinetobacter baumannii	470	Acinetobacter	baumannii
GCF_000592275.1	Acinetobacter baumannii	Acinetobacter	469	Acinetobacter baumannii	470	Acinetobacter	baumannii
GCF_000584855.1	Acinetobacter baumannii	Acinetobacter	469	Acinetobacter baumannii	470	Acinetobacter	baumannii
GCF_000309195.1	Acinetobacter baumannii	Acinetobacter	469	Acinetobacter baumannii	470	Acinetobacter	baumannii
GCF_000623035.1	Acinetobacter baumannii	Acinetobacter	469	Acinetobacter baumannii	470	Acinetobacter	baumannii
GCF_000592175.1	Acinetobacter baumannii	Acinetobacter	469	Acinetobacter baumannii	470	Acinetobacter	baumannii
GCF_000804665.1	Acinetobacter baumannii	Acinetobacter	469	Acinetobacter baumannii	470	Acinetobacter	baumannii
GCF_000876445.1	Acinetobacter baumannii	Acinetobacter	469	Acinetobacter baumannii	470	Acinetobacter	baumannii
GCF_001617915.1	Acinetobacter baumannii	Acinetobacter	469	Acinetobacter baumannii	470	Acinetobacter	baumannii
GCF_000588915.1	Acinetobacter baumannii	Acinetobacter	469	Acinetobacter baumannii	470	Acinetobacter	baumannii
GCF_000810525.3	Acinetobacter baumannii	Acinetobacter	469	Acinetobacter baumannii	470	Acinetobacter	baumannii
GCF_000810265.3	Acinetobacter baumannii	Acinetobacter	469	Acinetobacter baumannii	470	Acinetobacter	baumannii
GCF_000369225.1	Acinetobacter baumannii	Acinetobacter	469	Acinetobacter baumannii	470	Acinetobacter	baumannii
GCF_000241705.1	Acinetobacter baumannii	Acinetobacter	469	Acinetobacter baumannii	470	Acinetobacter	baumannii
GCF_000611225.1	Acinetobacter baumannii	Acinetobacter	469	Acinetobacter baumannii	470	Acinetobacter	baumannii
GCF_001433275.1	Acinetobacter baumannii	Acinetobacter	469	Acinetobacter baumannii	470	Acinetobacter	baumannii
GCF_000453485.1	Acinetobacter baumannii	Acinetobacter	469	Acinetobacter baumannii	470	Acinetobacter	baumannii
GCF_000969295.1	Acinetobacter baumannii	Acinetobacter	469	Acinetobacter baumannii	470	Acinetobacter	baumannii
GCF_001416305.1	Acinetobacter baumannii	Acinetobacter	469	Acinetobacter baumannii	470	Acinetobacter	baumannii
GCF_001612105.1	Acinetobacter baumannii	Acinetobacter	469	Acinetobacter baumannii	470	Acinetobacter	baumannii
GCF_000591735.1	Acinetobacter baumannii	Acinetobacter	469	Acinetobacter baumannii	470	Acinetobacter	baumannii
GCF_000583375.1	Acinetobacter baumannii	Acinetobacter	469	Acinetobacter baumannii	470	Acinetobacter	baumannii
GCF_001414805.1	Acinetobacter baumannii	Acinetobacter	469	Acinetobacter baumannii	470	Acinetobacter	baumannii
GCF_000353975.1	Acinetobacter baumannii	Acinetobacter	469	Acinetobacter baumannii	470	Acinetobacter	baumannii
GCF_000419405.1	Acinetobacter baumannii	Acinetobacter	469	Acinetobacter baumannii	470	Acinetobacter	baumannii
GCF_000811585.3	Acinetobacter baumannii	Acinetobacter	469	Acinetobacter baumannii	470	Acinetobacter	baumannii
GCF_000828795.1	Acinetobacter baumannii	Acinetobacter	469	Acinetobacter baumannii	470	Acinetobacter	baumannii
GCF_001432525.1	Acinetobacter baumannii	Acinetobacter	469	Acinetobacter baumannii	470	Acinetobacter	baumannii
GCF_000811345.3	Acinetobacter baumannii	Acinetobacter	469	Acinetobacter baumannii	470	Acinetobacter	baumannii
GCF_001077675.1	Acinetobacter baumannii	Acinetobacter	469	Acinetobacter baumannii	470	Acinetobacter	baumannii
GCF_001077965.1	Acinetobacter baumannii	Acinetobacter	469	Acinetobacter baumannii	470	Acinetobacter	baumannii
GCF_000515795.1	Acinetobacter baumannii	Acinetobacter	469	Acinetobacter baumannii	470	Acinetobacter	baumannii
GCF_000600815.1	Acinetobacter baumannii	Acinetobacter	469	Acinetobacter baumannii	470	Acinetobacter	baumannii
GCF_000809065.3	Acinetobacter baumannii	Acinetobacter	469	Acinetobacter baumannii	470	Acinetobacter	baumannii
GCF_000583355.1	Acinetobacter baumannii	Acinetobacter	469	Acinetobacter baumannii	470	Acinetobacter	baumannii
GCF_000808985.3	Acinetobacter baumannii	Acinetobacter	469	Acinetobacter baumannii	470	Acinetobacter	baumannii
GCF_000746605.1	Acinetobacter baumannii	Acinetobacter	469	Acinetobacter baumannii	470	Acinetobacter	baumannii
GCF_001444265.1	Acinetobacter baumannii	Acinetobacter	469	Acinetobacter baumannii	470	Acinetobacter	baumannii
GCF_000671615.1	Acinetobacter baumannii	Acinetobacter	469	Acinetobacter baumannii	470	Acinetobacter	baumannii
GCF_001276085.1	Acinetobacter baumannii	Acinetobacter	469	Acinetobacter baumannii	470	Acinetobacter	baumannii
GCF_001415275.1	Acinetobacter baumannii	Acinetobacter	469	Acinetobacter baumannii	470	Acinetobacter	baumannii
GCF_000588675.1	Acinetobacter baumannii	Acinetobacter	469	Acinetobacter baumannii	470	Acinetobacter	baumannii
GCF_001414915.1	Acinetobacter baumannii	Acinetobacter	469	Acinetobacter baumannii	470	Acinetobacter	baumannii
GCF_000297515.1	Acinetobacter baumannii	Acinetobacter	469	Acinetobacter baumannii	470	Acinetobacter	baumannii
GCF_001541795.1	Acinetobacter baumannii	Acinetobacter	469	Acinetobacter baumannii	470	Acinetobacter	baumannii
GCF_000353795.1	Acinetobacter baumannii	Acinetobacter	469	Acinetobacter baumannii	470	Acinetobacter	baumannii
GCF_001511935.1	Acinetobacter baumannii	Acinetobacter	469	Acinetobacter baumannii	470	Acinetobacter	baumannii
GCF_000580495.1	Acinetobacter baumannii	Acinetobacter	469	Acinetobacter baumannii	470	Acinetobacter	baumannii
GCF_000671535.1	Acinetobacter baumannii	Acinetobacter	469	Acinetobacter baumannii	470	Acinetobacter	baumannii
GCF_000581875.1	Acinetobacter baumannii	Acinetobacter	469	Acinetobacter baumannii	470	Acinetobacter	baumannii
GCF_000305315.1	Acinetobacter baumannii	Acinetobacter	469	Acinetobacter baumannii	470	Acinetobacter	baumannii
GCF_000582035.1	Acinetobacter baumannii	Acinetobacter	469	Acinetobacter baumannii	470	Acinetobacter	baumannii
GCF_001416635.1	Acinetobacter baumannii	Acinetobacter	469	Acinetobacter baumannii	470	Acinetobacter	baumannii
GCF_000302275.1	Acinetobacter baumannii	Acinetobacter	469	Acinetobacter baumannii	470	Acinetobacter	baumannii
GCF_000627775.1	Acinetobacter baumannii	Acinetobacter	469	Acinetobacter baumannii	470	Acinetobacter	baumannii
GCF_000515755.1	Acinetobacter baumannii	Acinetobacter	469	Acinetobacter baumannii	470	Acinetobacter	baumannii
GCF_000584135.1	Acinetobacter baumannii	Acinetobacter	469	Acinetobacter baumannii	470	Acinetobacter	baumannii
GCF_001415665.1	Acinetobacter baumannii	Acinetobacter	469	Acinetobacter baumannii	470	Acinetobacter	baumannii
GCF_001433155.1	Acinetobacter baumannii	Acinetobacter	469	Acinetobacter baumannii	470	Acinetobacter	baumannii
GCF_000368545.1	Acinetobacter baumannii	Acinetobacter	469	Acinetobacter baumannii	470	Acinetobacter	baumannii
GCF_001432785.1	Acinetobacter baumannii	Acinetobacter	469	Acinetobacter baumannii	470	Acinetobacter	baumannii
GCF_001416315.1	Acinetobacter baumannii	Acinetobacter	469	Acinetobacter baumannii	470	Acinetobacter	baumannii
GCF_001416385.1	Acinetobacter baumannii	Acinetobacter	469	Acinetobacter baumannii	470	Acinetobacter	baumannii
GCF_000809585.3	Acinetobacter baumannii	Acinetobacter	469	Acinetobacter baumannii	470	Acinetobacter	baumannii
GCF_000588555.1	Acinetobacter baumannii	Acinetobacter	469	Acinetobacter baumannii	470	Acinetobacter	baumannii
GCF_000770905.1	Acinetobacter baumannii	Acinetobacter	469	Acinetobacter baumannii	470	Acinetobacter	baumannii
GCF_000611245.1	Acinetobacter baumannii	Acinetobacter	469	Acinetobacter baumannii	470	Acinetobacter	baumannii
GCF_000369345.1	Acinetobacter baumannii	Acinetobacter	469	Acinetobacter baumannii	470	Acinetobacter	baumannii
GCF_000810985.3	Acinetobacter baumannii	Acinetobacter	469	Acinetobacter baumannii	470	Acinetobacter	baumannii
GCF_000591875.1	Acinetobacter baumannii	Acinetobacter	469	Acinetobacter baumannii	470	Acinetobacter	baumannii
GCF_000738845.1	Acinetobacter baumannii	Acinetobacter	469	Acinetobacter baumannii	470	Acinetobacter	baumannii
GCF_001518715.1	Acinetobacter baumannii	Acinetobacter	469	Acinetobacter baumannii	470	Acinetobacter	baumannii
GCF_000805295.1	Acinetobacter baumannii	Acinetobacter	469	Acinetobacter baumannii	470	Acinetobacter	baumannii
GCF_000591835.1	Acinetobacter baumannii	Acinetobacter	469	Acinetobacter baumannii	470	Acinetobacter	baumannii
GCF_000515955.1	Acinetobacter baumannii	Acinetobacter	469	Acinetobacter baumannii	470	Acinetobacter	baumannii
GCF_001415025.1	Acinetobacter baumannii	Acinetobacter	469	Acinetobacter baumannii	470	Acinetobacter	baumannii
GCF_000682215.1	Acinetobacter baumannii	Acinetobacter	469	Acinetobacter baumannii	470	Acinetobacter	baumannii
GCF_000682395.1	Acinetobacter baumannii	Acinetobacter	469	Acinetobacter baumannii	470	Acinetobacter	baumannii
GCF_000301475.1	Acinetobacter baumannii	Acinetobacter	469	Acinetobacter baumannii	470	Acinetobacter	baumannii
GCF_000453585.1	Acinetobacter baumannii	Acinetobacter	469	Acinetobacter baumannii	470	Acinetobacter	baumannii
GCF_001433245.1	Acinetobacter baumannii	Acinetobacter	469	Acinetobacter baumannii	470	Acinetobacter	baumannii
GCF_001416705.1	Acinetobacter baumannii	Acinetobacter	469	Acinetobacter baumannii	470	Acinetobacter	baumannii
GCF_000592395.1	Acinetobacter baumannii	Acinetobacter	469	Acinetobacter baumannii	470	Acinetobacter	baumannii
GCF_000302055.1	Acinetobacter baumannii	Acinetobacter	469	Acinetobacter baumannii	470	Acinetobacter	baumannii
GCF_000354115.1	Acinetobacter baumannii	Acinetobacter	469	Acinetobacter baumannii	470	Acinetobacter	baumannii
GCF_000588695.1	Acinetobacter baumannii	Acinetobacter	469	Acinetobacter baumannii	470	Acinetobacter	baumannii
GCF_000302235.1	Acinetobacter baumannii	Acinetobacter	469	Acinetobacter baumannii	470	Acinetobacter	baumannii
GCF_001417515.1	Acinetobacter baumannii	Acinetobacter	469	Acinetobacter baumannii	470	Acinetobacter	baumannii
GCF_000814345.1	Acinetobacter baumannii	Acinetobacter	469	Acinetobacter baumannii	470	Acinetobacter	baumannii
GCF_001007765.1	Acinetobacter baumannii	Acinetobacter	469	Acinetobacter baumannii	470	Acinetobacter	baumannii
GCF_001617895.1	Acinetobacter baumannii	Acinetobacter	469	Acinetobacter baumannii	470	Acinetobacter	baumannii
GCF_000809205.3	Acinetobacter baumannii	Acinetobacter	469	Acinetobacter baumannii	470	Acinetobacter	baumannii
GCF_000516035.1	Acinetobacter baumannii	Acinetobacter	469	Acinetobacter baumannii	470	Acinetobacter	baumannii
GCF_000587975.1	Acinetobacter baumannii	Acinetobacter	469	Acinetobacter baumannii	470	Acinetobacter	baumannii
GCF_001415085.1	Acinetobacter baumannii	Acinetobacter	469	Acinetobacter baumannii	470	Acinetobacter	baumannii
GCF_001432545.1	Acinetobacter baumannii	Acinetobacter	469	Acinetobacter baumannii	470	Acinetobacter	baumannii
GCF_000453045.1	Acinetobacter baumannii	Acinetobacter	469	Acinetobacter baumannii	470	Acinetobacter	baumannii
GCF_000611545.1	Acinetobacter baumannii	Acinetobacter	469	Acinetobacter baumannii	470	Acinetobacter	baumannii
GCF_000592435.1	Acinetobacter baumannii	Acinetobacter	469	Acinetobacter baumannii	470	Acinetobacter	baumannii
GCF_000810005.3	Acinetobacter baumannii	Acinetobacter	469	Acinetobacter baumannii	470	Acinetobacter	baumannii
GCF_000811285.3	Acinetobacter baumannii	Acinetobacter	469	Acinetobacter baumannii	470	Acinetobacter	baumannii
GCF_000592035.1	Acinetobacter baumannii	Acinetobacter	469	Acinetobacter baumannii	470	Acinetobacter	baumannii
GCF_000069245.1	Acinetobacter baumannii	Acinetobacter	469	Acinetobacter baumannii	470	Acinetobacter	baumannii
GCF_000809845.3	Acinetobacter baumannii	Acinetobacter	469	Acinetobacter baumannii	470	Acinetobacter	baumannii
GCF_001549575.1	Acinetobacter baumannii	Acinetobacter	469	Acinetobacter baumannii	470	Acinetobacter	baumannii
GCF_000805525.1	Acinetobacter baumannii	Acinetobacter	469	Acinetobacter baumannii	470	Acinetobacter	baumannii
GCF_000304675.1	Acinetobacter baumannii	Acinetobacter	469	Acinetobacter baumannii	470	Acinetobacter	baumannii
GCF_000811945.3	Acinetobacter baumannii	Acinetobacter	469	Acinetobacter baumannii	470	Acinetobacter	baumannii
GCF_000811265.3	Acinetobacter baumannii	Acinetobacter	469	Acinetobacter baumannii	470	Acinetobacter	baumannii
GCF_000804745.1	Acinetobacter baumannii	Acinetobacter	469	Acinetobacter baumannii	470	Acinetobacter	baumannii
GCF_000809925.3	Acinetobacter baumannii	Acinetobacter	469	Acinetobacter baumannii	470	Acinetobacter	baumannii
GCF_000811545.3	Acinetobacter baumannii	Acinetobacter	469	Acinetobacter baumannii	470	Acinetobacter	baumannii
GCF_000627735.1	Acinetobacter baumannii	Acinetobacter	469	Acinetobacter baumannii	470	Acinetobacter	baumannii
GCF_001416355.1	Acinetobacter baumannii	Acinetobacter	469	Acinetobacter baumannii	470	Acinetobacter	baumannii
GCF_001415835.1	Acinetobacter baumannii	Acinetobacter	469	Acinetobacter baumannii	470	Acinetobacter	baumannii
GCF_000671415.1	Acinetobacter baumannii	Acinetobacter	469	Acinetobacter baumannii	470	Acinetobacter	baumannii
GCF_000600395.1	Acinetobacter baumannii	Acinetobacter	469	Acinetobacter baumannii	470	Acinetobacter	baumannii
GCF_000734775.1	Acinetobacter baumannii	Acinetobacter	469	Acinetobacter baumannii	470	Acinetobacter	baumannii
GCF_000692095.1	Acinetobacter baumannii	Acinetobacter	469	Acinetobacter baumannii	470	Acinetobacter	baumannii
GCF_000498375.1	Acinetobacter baumannii	Acinetobacter	469	Acinetobacter baumannii	470	Acinetobacter	baumannii
GCF_000600935.1	Acinetobacter baumannii	Acinetobacter	469	Acinetobacter baumannii	470	Acinetobacter	baumannii
GCF_000809625.3	Acinetobacter baumannii	Acinetobacter	469	Acinetobacter baumannii	470	Acinetobacter	baumannii
GCF_000441955.1	Acinetobacter baumannii	Acinetobacter	469	Acinetobacter baumannii	470	Acinetobacter	baumannii
GCF_000163395.2	Acinetobacter baumannii	Acinetobacter	469	Acinetobacter baumannii	470	Acinetobacter	baumannii
GCF_000354015.1	Acinetobacter baumannii	Acinetobacter	469	Acinetobacter baumannii	470	Acinetobacter	baumannii
GCF_001573105.1	Acinetobacter baumannii	Acinetobacter	469	Acinetobacter baumannii	470	Acinetobacter	baumannii
GCF_000681635.1	Acinetobacter baumannii	Acinetobacter	469	Acinetobacter baumannii	470	Acinetobacter	baumannii
GCF_000681975.1	Acinetobacter baumannii	Acinetobacter	469	Acinetobacter baumannii	470	Acinetobacter	baumannii
GCF_000969385.1	Acinetobacter baumannii	Acinetobacter	469	Acinetobacter baumannii	470	Acinetobacter	baumannii
GCF_000600575.1	Acinetobacter baumannii	Acinetobacter	469	Acinetobacter baumannii	470	Acinetobacter	baumannii
GCF_000809305.3	Acinetobacter baumannii	Acinetobacter	469	Acinetobacter baumannii	470	Acinetobacter	baumannii
GCF_001441565.1	Acinetobacter baumannii	Acinetobacter	469	Acinetobacter baumannii	470	Acinetobacter	baumannii
GCF_000876055.1	Acinetobacter baumannii	Acinetobacter	469	Acinetobacter baumannii	470	Acinetobacter	baumannii
GCF_000836075.1	Acinetobacter baumannii	Acinetobacter	469	Acinetobacter baumannii	470	Acinetobacter	baumannii
GCF_000805135.1	Acinetobacter baumannii	Acinetobacter	469	Acinetobacter baumannii	470	Acinetobacter	baumannii
GCF_000804815.1	Acinetobacter baumannii	Acinetobacter	469	Acinetobacter baumannii	470	Acinetobacter	baumannii
GCF_000582275.1	Acinetobacter baumannii	Acinetobacter	469	Acinetobacter baumannii	470	Acinetobacter	baumannii
GCF_000580555.1	Acinetobacter baumannii	Acinetobacter	469	Acinetobacter baumannii	470	Acinetobacter	baumannii
GCF_000949175.2	Acinetobacter baumannii	Acinetobacter	469	Acinetobacter baumannii	470	Acinetobacter	baumannii
GCF_000588175.1	Acinetobacter baumannii	Acinetobacter	469	Acinetobacter baumannii	470	Acinetobacter	baumannii
GCF_000811725.3	Acinetobacter baumannii	Acinetobacter	469	Acinetobacter baumannii	470	Acinetobacter	baumannii
GCF_000939415.2	Acinetobacter baumannii	Acinetobacter	469	Acinetobacter baumannii	470	Acinetobacter	baumannii
GCF_000592015.1	Acinetobacter baumannii	Acinetobacter	469	Acinetobacter baumannii	470	Acinetobacter	baumannii
GCF_001432755.1	Acinetobacter baumannii	Acinetobacter	469	Acinetobacter baumannii	470	Acinetobacter	baumannii
GCF_000811705.3	Acinetobacter baumannii	Acinetobacter	469	Acinetobacter baumannii	470	Acinetobacter	baumannii
GCF_000582945.1	Acinetobacter baumannii	Acinetobacter	469	Acinetobacter baumannii	470	Acinetobacter	baumannii
GCF_000589515.1	Acinetobacter baumannii	Acinetobacter	469	Acinetobacter baumannii	470	Acinetobacter	baumannii
GCF_000591695.1	Acinetobacter baumannii	Acinetobacter	469	Acinetobacter baumannii	470	Acinetobacter	baumannii
GCF_000515675.1	Acinetobacter baumannii	Acinetobacter	469	Acinetobacter baumannii	470	Acinetobacter	baumannii
GCF_000804715.1	Acinetobacter baumannii	Acinetobacter	469	Acinetobacter baumannii	470	Acinetobacter	baumannii
GCF_000611045.1	Acinetobacter baumannii	Acinetobacter	469	Acinetobacter baumannii	470	Acinetobacter	baumannii
GCF_000809525.3	Acinetobacter baumannii	Acinetobacter	469	Acinetobacter baumannii	470	Acinetobacter	baumannii
GCF_000301575.1	Acinetobacter baumannii	Acinetobacter	469	Acinetobacter baumannii	470	Acinetobacter	baumannii
GCF_001441555.1	Acinetobacter baumannii	Acinetobacter	469	Acinetobacter baumannii	470	Acinetobacter	baumannii
GCF_000335675.1	Acinetobacter baumannii	Acinetobacter	469	Acinetobacter baumannii	470	Acinetobacter	baumannii
GCF_000589275.1	Acinetobacter baumannii	Acinetobacter	469	Acinetobacter baumannii	470	Acinetobacter	baumannii
GCF_000517485.2	Acinetobacter baumannii	Acinetobacter	469	Acinetobacter baumannii	470	Acinetobacter	baumannii
GCF_000611105.1	Acinetobacter baumannii	Acinetobacter	469	Acinetobacter baumannii	470	Acinetobacter	baumannii
GCF_000302575.1	Acinetobacter baumannii	Acinetobacter	469	Acinetobacter baumannii	470	Acinetobacter	baumannii
GCF_000163355.2	Acinetobacter baumannii	Acinetobacter	469	Acinetobacter baumannii	470	Acinetobacter	baumannii
GCF_000588935.1	Acinetobacter baumannii	Acinetobacter	469	Acinetobacter baumannii	470	Acinetobacter	baumannii
GCF_000804895.1	Acinetobacter baumannii	Acinetobacter	469	Acinetobacter baumannii	470	Acinetobacter	baumannii
GCF_000810325.3	Acinetobacter baumannii	Acinetobacter	469	Acinetobacter baumannii	470	Acinetobacter	baumannii
GCF_000584835.1	Acinetobacter baumannii	Acinetobacter	469	Acinetobacter baumannii	470	Acinetobacter	baumannii
GCF_000587895.1	Acinetobacter baumannii	Acinetobacter	469	Acinetobacter baumannii	470	Acinetobacter	baumannii
GCF_000581375.1	Acinetobacter baumannii	Acinetobacter	469	Acinetobacter baumannii	470	Acinetobacter	baumannii
GCF_000600715.1	Acinetobacter baumannii	Acinetobacter	469	Acinetobacter baumannii	470	Acinetobacter	baumannii
GCF_000368205.1	Acinetobacter baumannii	Acinetobacter	469	Acinetobacter baumannii	470	Acinetobacter	baumannii
GCF_000453465.1	Acinetobacter baumannii	Acinetobacter	469	Acinetobacter baumannii	470	Acinetobacter	baumannii
GCF_000808945.3	Acinetobacter baumannii	Acinetobacter	469	Acinetobacter baumannii	470	Acinetobacter	baumannii
GCF_000809445.3	Acinetobacter baumannii	Acinetobacter	469	Acinetobacter baumannii	470	Acinetobacter	baumannii
GCF_000811485.3	Acinetobacter baumannii	Acinetobacter	469	Acinetobacter baumannii	470	Acinetobacter	baumannii
GCF_000589075.1	Acinetobacter baumannii	Acinetobacter	469	Acinetobacter baumannii	470	Acinetobacter	baumannii
GCF_000966515.1	Acinetobacter baumannii	Acinetobacter	469	Acinetobacter baumannii	470	Acinetobacter	baumannii
GCF_000581235.1	Acinetobacter baumannii	Acinetobacter	469	Acinetobacter baumannii	470	Acinetobacter	baumannii
GCF_000611285.1	Acinetobacter baumannii	Acinetobacter	469	Acinetobacter baumannii	470	Acinetobacter	baumannii
GCF_001433045.1	Acinetobacter baumannii	Acinetobacter	469	Acinetobacter baumannii	470	Acinetobacter	baumannii
GCF_000600615.1	Acinetobacter baumannii	Acinetobacter	469	Acinetobacter baumannii	470	Acinetobacter	baumannii
GCF_000805145.1	Acinetobacter baumannii	Acinetobacter	469	Acinetobacter baumannii	470	Acinetobacter	baumannii
GCF_000588235.1	Acinetobacter baumannii	Acinetobacter	469	Acinetobacter baumannii	470	Acinetobacter	baumannii
GCF_000592515.1	Acinetobacter baumannii	Acinetobacter	469	Acinetobacter baumannii	470	Acinetobacter	baumannii
GCF_000584315.1	Acinetobacter baumannii	Acinetobacter	469	Acinetobacter baumannii	470	Acinetobacter	baumannii
GCF_000810485.3	Acinetobacter baumannii	Acinetobacter	469	Acinetobacter baumannii	470	Acinetobacter	baumannii
GCF_000353895.1	Acinetobacter baumannii	Acinetobacter	469	Acinetobacter baumannii	470	Acinetobacter	baumannii
GCF_000969485.1	Acinetobacter baumannii	Acinetobacter	469	Acinetobacter baumannii	470	Acinetobacter	baumannii
GCF_000592555.1	Acinetobacter baumannii	Acinetobacter	469	Acinetobacter baumannii	470	Acinetobacter	baumannii
GCF_000581135.1	Acinetobacter baumannii	Acinetobacter	469	Acinetobacter baumannii	470	Acinetobacter	baumannii
GCF_000810305.3	Acinetobacter baumannii	Acinetobacter	469	Acinetobacter baumannii	470	Acinetobacter	baumannii
GCF_000584535.1	Acinetobacter baumannii	Acinetobacter	469	Acinetobacter baumannii	470	Acinetobacter	baumannii
GCF_000809965.3	Acinetobacter baumannii	Acinetobacter	469	Acinetobacter baumannii	470	Acinetobacter	baumannii
GCF_000309215.1	Acinetobacter baumannii	Acinetobacter	469	Acinetobacter baumannii	470	Acinetobacter	baumannii
GCF_000580535.1	Acinetobacter baumannii	Acinetobacter	469	Acinetobacter baumannii	470	Acinetobacter	baumannii
GCF_000775875.1	Acinetobacter baumannii	Acinetobacter	469	Acinetobacter baumannii	470	Acinetobacter	baumannii
GCF_000301955.1	Acinetobacter baumannii	Acinetobacter	469	Acinetobacter baumannii	470	Acinetobacter	baumannii
GCF_000786735.1	Acinetobacter baumannii	Acinetobacter	469	Acinetobacter baumannii	470	Acinetobacter	baumannii
GCF_000582335.1	Acinetobacter baumannii	Acinetobacter	469	Acinetobacter baumannii	470	Acinetobacter	baumannii
GCF_000723125.1	Acinetobacter baumannii	Acinetobacter	469	Acinetobacter baumannii	470	Acinetobacter	baumannii
GCF_001612355.1	Acinetobacter baumannii	Acinetobacter	469	Acinetobacter baumannii	470	Acinetobacter	baumannii
GCF_000184495.1	Acinetobacter baumannii	Acinetobacter	469	Acinetobacter baumannii	470	Acinetobacter	baumannii
GCF_000515715.1	Acinetobacter baumannii	Acinetobacter	469	Acinetobacter baumannii	470	Acinetobacter	baumannii
GCF_000582965.1	Acinetobacter baumannii	Acinetobacter	469	Acinetobacter baumannii	470	Acinetobacter	baumannii
GCF_001415875.1	Acinetobacter baumannii	Acinetobacter	469	Acinetobacter baumannii	470	Acinetobacter	baumannii
GCF_000583555.1	Acinetobacter baumannii	Acinetobacter	469	Acinetobacter baumannii	470	Acinetobacter	baumannii
GCF_001512235.1	Acinetobacter baumannii	Acinetobacter	469	Acinetobacter baumannii	470	Acinetobacter	baumannii
GCF_000581815.1	Acinetobacter baumannii	Acinetobacter	469	Acinetobacter baumannii	470	Acinetobacter	baumannii
GCF_000809865.3	Acinetobacter baumannii	Acinetobacter	469	Acinetobacter baumannii	470	Acinetobacter	baumannii
GCF_000627755.1	Acinetobacter baumannii	Acinetobacter	469	Acinetobacter baumannii	470	Acinetobacter	baumannii
GCF_001415215.1	Acinetobacter baumannii	Acinetobacter	469	Acinetobacter baumannii	470	Acinetobacter	baumannii
GCF_001511995.1	Acinetobacter baumannii	Acinetobacter	469	Acinetobacter baumannii	470	Acinetobacter	baumannii
GCF_001420515.1	Acinetobacter baumannii	Acinetobacter	469	Acinetobacter baumannii	470	Acinetobacter	baumannii
GCF_000516155.1	Acinetobacter baumannii	Acinetobacter	469	Acinetobacter baumannii	470	Acinetobacter	baumannii
GCF_000592415.1	Acinetobacter baumannii	Acinetobacter	469	Acinetobacter baumannii	470	Acinetobacter	baumannii
GCF_001512215.1	Acinetobacter baumannii	Acinetobacter	469	Acinetobacter baumannii	470	Acinetobacter	baumannii
GCF_000722975.1	Acinetobacter baumannii	Acinetobacter	469	Acinetobacter baumannii	470	Acinetobacter	baumannii
GCF_000810665.3	Acinetobacter baumannii	Acinetobacter	469	Acinetobacter baumannii	470	Acinetobacter	baumannii
GCF_000589315.1	Acinetobacter baumannii	Acinetobacter	469	Acinetobacter baumannii	470	Acinetobacter	baumannii
GCF_000187205.2	Acinetobacter baumannii	Acinetobacter	469	Acinetobacter baumannii	470	Acinetobacter	baumannii
GCF_000587935.1	Acinetobacter baumannii	Acinetobacter	469	Acinetobacter baumannii	470	Acinetobacter	baumannii
GCF_000580595.1	Acinetobacter baumannii	Acinetobacter	469	Acinetobacter baumannii	470	Acinetobacter	baumannii
GCF_001415915.1	Acinetobacter baumannii	Acinetobacter	469	Acinetobacter baumannii	470	Acinetobacter	baumannii
GCF_001443265.1	Acinetobacter baumannii	Acinetobacter	469	Acinetobacter baumannii	470	Acinetobacter	baumannii
GCF_000309135.1	Acinetobacter baumannii	Acinetobacter	469	Acinetobacter baumannii	470	Acinetobacter	baumannii
GCF_000836625.1	Acinetobacter baumannii	Acinetobacter	469	Acinetobacter baumannii	470	Acinetobacter	baumannii
GCF_001276055.1	Acinetobacter baumannii	Acinetobacter	469	Acinetobacter baumannii	470	Acinetobacter	baumannii
GCF_000516275.1	Acinetobacter baumannii	Acinetobacter	469	Acinetobacter baumannii	470	Acinetobacter	baumannii
GCF_000805035.1	Acinetobacter baumannii	Acinetobacter	469	Acinetobacter baumannii	470	Acinetobacter	baumannii
GCF_001612255.1	Acinetobacter baumannii	Acinetobacter	469	Acinetobacter baumannii	470	Acinetobacter	baumannii
GCF_000723055.1	Acinetobacter baumannii	Acinetobacter	469	Acinetobacter baumannii	470	Acinetobacter	baumannii
GCF_000516315.1	Acinetobacter baumannii	Acinetobacter	469	Acinetobacter baumannii	470	Acinetobacter	baumannii
GCF_000584635.1	Acinetobacter baumannii	Acinetobacter	469	Acinetobacter baumannii	470	Acinetobacter	baumannii
GCF_001441355.1	Acinetobacter baumannii	Acinetobacter	469	Acinetobacter baumannii	470	Acinetobacter	baumannii
GCF_001441545.1	Acinetobacter baumannii	Acinetobacter	469	Acinetobacter baumannii	470	Acinetobacter	baumannii
GCF_000808925.3	Acinetobacter baumannii	Acinetobacter	469	Acinetobacter baumannii	470	Acinetobacter	baumannii
GCF_001077555.1	Acinetobacter baumannii	Acinetobacter	469	Acinetobacter baumannii	470	Acinetobacter	baumannii
GCF_000580455.1	Acinetobacter baumannii	Acinetobacter	469	Acinetobacter baumannii	470	Acinetobacter	baumannii
GCF_000302015.1	Acinetobacter baumannii	Acinetobacter	469	Acinetobacter baumannii	470	Acinetobacter	baumannii
GCF_001617835.1	Acinetobacter baumannii	Acinetobacter	469	Acinetobacter baumannii	470	Acinetobacter	baumannii
GCF_000589015.1	Acinetobacter baumannii	Acinetobacter	469	Acinetobacter baumannii	470	Acinetobacter	baumannii
GCF_000286615.1	Acinetobacter baumannii	Acinetobacter	469	Acinetobacter baumannii	470	Acinetobacter	baumannii
GCF_001414935.1	Acinetobacter baumannii	Acinetobacter	469	Acinetobacter baumannii	470	Acinetobacter	baumannii
GCF_000309175.1	Acinetobacter baumannii	Acinetobacter	469	Acinetobacter baumannii	470	Acinetobacter	baumannii
GCF_000177735.1	Acinetobacter baumannii	Acinetobacter	469	Acinetobacter baumannii	470	Acinetobacter	baumannii
GCF_001578145.1	Acinetobacter baumannii	Acinetobacter	469	Acinetobacter baumannii	470	Acinetobacter	baumannii
GCF_000580615.1	Acinetobacter baumannii	Acinetobacter	469	Acinetobacter baumannii	470	Acinetobacter	baumannii
GCF_000453565.1	Acinetobacter baumannii	Acinetobacter	469	Acinetobacter baumannii	470	Acinetobacter	baumannii
GCF_000580395.1	Acinetobacter baumannii	Acinetobacter	469	Acinetobacter baumannii	470	Acinetobacter	baumannii
GCF_000592595.1	Acinetobacter baumannii	Acinetobacter	469	Acinetobacter baumannii	470	Acinetobacter	baumannii
GCF_000763365.1	Acinetobacter baumannii	Acinetobacter	469	Acinetobacter baumannii	470	Acinetobacter	baumannii
GCF_001416565.1	Acinetobacter baumannii	Acinetobacter	469	Acinetobacter baumannii	470	Acinetobacter	baumannii
GCF_001416075.1	Acinetobacter baumannii	Acinetobacter	469	Acinetobacter baumannii	470	Acinetobacter	baumannii
GCF_000584775.1	Acinetobacter baumannii	Acinetobacter	469	Acinetobacter baumannii	470	Acinetobacter	baumannii
GCF_000353775.1	Acinetobacter baumannii	Acinetobacter	469	Acinetobacter baumannii	470	Acinetobacter	baumannii
GCF_000515895.1	Acinetobacter baumannii	Acinetobacter	469	Acinetobacter baumannii	470	Acinetobacter	baumannii
GCF_000671655.1	Acinetobacter baumannii	Acinetobacter	469	Acinetobacter baumannii	470	Acinetobacter	baumannii
GCF_001415435.1	Acinetobacter baumannii	Acinetobacter	469	Acinetobacter baumannii	470	Acinetobacter	baumannii
GCF_000301975.1	Acinetobacter baumannii	Acinetobacter	469	Acinetobacter baumannii	470	Acinetobacter	baumannii
GCF_000671635.1	Acinetobacter baumannii	Acinetobacter	469	Acinetobacter baumannii	470	Acinetobacter	baumannii
GCF_000301615.1	Acinetobacter baumannii	Acinetobacter	469	Acinetobacter baumannii	470	Acinetobacter	baumannii
GCF_000627555.1	Acinetobacter baumannii	Acinetobacter	469	Acinetobacter baumannii	470	Acinetobacter	baumannii
GCF_000584075.1	Acinetobacter baumannii	Acinetobacter	469	Acinetobacter baumannii	470	Acinetobacter	baumannii
GCF_000810725.3	Acinetobacter baumannii	Acinetobacter	469	Acinetobacter baumannii	470	Acinetobacter	baumannii
GCF_000809805.3	Acinetobacter baumannii	Acinetobacter	469	Acinetobacter baumannii	470	Acinetobacter	baumannii
GCF_000723145.1	Acinetobacter baumannii	Acinetobacter	469	Acinetobacter baumannii	470	Acinetobacter	baumannii
GCF_001512255.1	Acinetobacter baumannii	Acinetobacter	469	Acinetobacter baumannii	470	Acinetobacter	baumannii
GCF_000723065.1	Acinetobacter baumannii	Acinetobacter	469	Acinetobacter baumannii	470	Acinetobacter	baumannii
GCF_000580975.1	Acinetobacter baumannii	Acinetobacter	469	Acinetobacter baumannii	470	Acinetobacter	baumannii
GCF_000611485.1	Acinetobacter baumannii	Acinetobacter	469	Acinetobacter baumannii	470	Acinetobacter	baumannii
GCF_000810285.3	Acinetobacter baumannii	Acinetobacter	469	Acinetobacter baumannii	470	Acinetobacter	baumannii
GCF_001414995.1	Acinetobacter baumannii	Acinetobacter	469	Acinetobacter baumannii	470	Acinetobacter	baumannii
GCF_000369265.1	Acinetobacter baumannii	Acinetobacter	469	Acinetobacter baumannii	470	Acinetobacter	baumannii
GCF_000810205.3	Acinetobacter baumannii	Acinetobacter	469	Acinetobacter baumannii	470	Acinetobacter	baumannii
GCF_000682295.1	Acinetobacter baumannii	Acinetobacter	469	Acinetobacter baumannii	470	Acinetobacter	baumannii
GCF_000580515.1	Acinetobacter baumannii	Acinetobacter	469	Acinetobacter baumannii	470	Acinetobacter	baumannii
GCF_000988155.1	Acinetobacter baumannii	Acinetobacter	469	Acinetobacter baumannii	470	Acinetobacter	baumannii
GCF_000600835.1	Acinetobacter baumannii	Acinetobacter	469	Acinetobacter baumannii	470	Acinetobacter	baumannii
GCF_001541765.1	Acinetobacter baumannii	Acinetobacter	469	Acinetobacter baumannii	470	Acinetobacter	baumannii
GCF_000820685.1	Acinetobacter baumannii	Acinetobacter	469	Acinetobacter baumannii	470	Acinetobacter	baumannii
GCF_000584235.1	Acinetobacter baumannii	Acinetobacter	469	Acinetobacter baumannii	470	Acinetobacter	baumannii
GCF_000581175.1	Acinetobacter baumannii	Acinetobacter	469	Acinetobacter baumannii	470	Acinetobacter	baumannii
GCF_000305215.1	Acinetobacter baumannii	Acinetobacter	469	Acinetobacter baumannii	470	Acinetobacter	baumannii
GCF_000588355.1	Acinetobacter baumannii	Acinetobacter	469	Acinetobacter baumannii	470	Acinetobacter	baumannii
GCF_000809905.3	Acinetobacter baumannii	Acinetobacter	469	Acinetobacter baumannii	470	Acinetobacter	baumannii
GCF_001617825.1	Acinetobacter baumannii	Acinetobacter	469	Acinetobacter baumannii	470	Acinetobacter	baumannii
GCF_000581995.1	Acinetobacter baumannii	Acinetobacter	469	Acinetobacter baumannii	470	Acinetobacter	baumannii
GCF_000515515.1	Acinetobacter baumannii	Acinetobacter	469	Acinetobacter baumannii	470	Acinetobacter	baumannii
GCF_000722965.1	Acinetobacter baumannii	Acinetobacter	469	Acinetobacter baumannii	470	Acinetobacter	baumannii
GCF_000354155.1	Acinetobacter baumannii	Acinetobacter	469	Acinetobacter baumannii	470	Acinetobacter	baumannii
GCF_000453905.1	Acinetobacter baumannii	Acinetobacter	469	Acinetobacter baumannii	470	Acinetobacter	baumannii
GCF_000591995.1	Acinetobacter baumannii	Acinetobacter	469	Acinetobacter baumannii	470	Acinetobacter	baumannii
GCF_000581495.1	Acinetobacter baumannii	Acinetobacter	469	Acinetobacter baumannii	470	Acinetobacter	baumannii
GCF_000810365.3	Acinetobacter baumannii	Acinetobacter	469	Acinetobacter baumannii	470	Acinetobacter	baumannii
GCF_000453525.1	Acinetobacter baumannii	Acinetobacter	469	Acinetobacter baumannii	470	Acinetobacter	baumannii
GCF_001415165.1	Acinetobacter baumannii	Acinetobacter	469	Acinetobacter baumannii	470	Acinetobacter	baumannii
GCF_000809505.3	Acinetobacter baumannii	Acinetobacter	469	Acinetobacter baumannii	470	Acinetobacter	baumannii
GCF_000600435.1	Acinetobacter baumannii	Acinetobacter	469	Acinetobacter baumannii	470	Acinetobacter	baumannii
GCF_000581255.1	Acinetobacter baumannii	Acinetobacter	469	Acinetobacter baumannii	470	Acinetobacter	baumannii
GCF_001416015.1	Acinetobacter baumannii	Acinetobacter	469	Acinetobacter baumannii	470	Acinetobacter	baumannii
GCF_000453985.1	Acinetobacter baumannii	Acinetobacter	469	Acinetobacter baumannii	470	Acinetobacter	baumannii
GCF_000787315.1	Acinetobacter baumannii	Acinetobacter	469	Acinetobacter baumannii	470	Acinetobacter	baumannii
GCF_001432595.1	Acinetobacter baumannii	Acinetobacter	469	Acinetobacter baumannii	470	Acinetobacter	baumannii
GCF_000515915.1	Acinetobacter baumannii	Acinetobacter	469	Acinetobacter baumannii	470	Acinetobacter	baumannii
GCF_000589495.1	Acinetobacter baumannii	Acinetobacter	469	Acinetobacter baumannii	470	Acinetobacter	baumannii
GCF_001077655.1	Acinetobacter baumannii	Acinetobacter	469	Acinetobacter baumannii	470	Acinetobacter	baumannii
GCF_000682175.1	Acinetobacter baumannii	Acinetobacter	469	Acinetobacter baumannii	470	Acinetobacter	baumannii
GCF_000278625.1	Acinetobacter baumannii	Acinetobacter	469	Acinetobacter baumannii	470	Acinetobacter	baumannii
GCF_000760455.1	Acinetobacter baumannii	Acinetobacter	469	Acinetobacter baumannii	470	Acinetobacter	baumannii
GCF_001028385.1	Acinetobacter baumannii	Acinetobacter	469	Acinetobacter baumannii	470	Acinetobacter	baumannii
GCF_000580475.1	Acinetobacter baumannii	Acinetobacter	469	Acinetobacter baumannii	470	Acinetobacter	baumannii
GCF_000589295.1	Acinetobacter baumannii	Acinetobacter	469	Acinetobacter baumannii	470	Acinetobacter	baumannii
GCF_000627635.1	Acinetobacter baumannii	Acinetobacter	469	Acinetobacter baumannii	470	Acinetobacter	baumannii
GCF_000305235.1	Acinetobacter baumannii	Acinetobacter	469	Acinetobacter baumannii	470	Acinetobacter	baumannii
GCF_000581895.1	Acinetobacter baumannii	Acinetobacter	469	Acinetobacter baumannii	470	Acinetobacter	baumannii
GCF_001415385.1	Acinetobacter baumannii	Acinetobacter	469	Acinetobacter baumannii	470	Acinetobacter	baumannii
GCF_001516805.1	Acinetobacter baumannii	Acinetobacter	469	Acinetobacter baumannii	470	Acinetobacter	baumannii
GCF_000600915.1	Acinetobacter baumannii	Acinetobacter	469	Acinetobacter baumannii	470	Acinetobacter	baumannii
GCF_000592155.1	Acinetobacter baumannii	Acinetobacter	469	Acinetobacter baumannii	470	Acinetobacter	baumannii
GCF_000589655.1	Acinetobacter baumannii	Acinetobacter	469	Acinetobacter baumannii	470	Acinetobacter	baumannii
GCF_000301535.1	Acinetobacter baumannii	Acinetobacter	469	Acinetobacter baumannii	470	Acinetobacter	baumannii
GCF_000627615.1	Acinetobacter baumannii	Acinetobacter	469	Acinetobacter baumannii	470	Acinetobacter	baumannii
GCF_000591675.1	Acinetobacter baumannii	Acinetobacter	469	Acinetobacter baumannii	470	Acinetobacter	baumannii
GCF_000305255.1	Acinetobacter baumannii	Acinetobacter	469	Acinetobacter baumannii	470	Acinetobacter	baumannii
GCF_000580575.1	Acinetobacter baumannii	Acinetobacter	469	Acinetobacter baumannii	470	Acinetobacter	baumannii
GCF_000580415.1	Acinetobacter baumannii	Acinetobacter	469	Acinetobacter baumannii	470	Acinetobacter	baumannii
GCF_000335535.1	Acinetobacter baumannii	Acinetobacter	469	Acinetobacter baumannii	470	Acinetobacter	baumannii
GCF_000682315.1	Acinetobacter baumannii	Acinetobacter	469	Acinetobacter baumannii	470	Acinetobacter	baumannii
GCF_000760415.1	Acinetobacter baumannii	Acinetobacter	469	Acinetobacter baumannii	470	Acinetobacter	baumannii
GCF_000018445.1	Acinetobacter baumannii	Acinetobacter	469	Acinetobacter baumannii	470	Acinetobacter	baumannii
GCF_000804985.1	Acinetobacter baumannii	Acinetobacter	469	Acinetobacter baumannii	470	Acinetobacter	baumannii
GCF_000623015.1	Acinetobacter baumannii	Acinetobacter	469	Acinetobacter baumannii	470	Acinetobacter	baumannii
GCF_000589755.1	Acinetobacter baumannii	Acinetobacter	469	Acinetobacter baumannii	470	Acinetobacter	baumannii
GCF_000301375.1	Acinetobacter baumannii	Acinetobacter	469	Acinetobacter baumannii	470	Acinetobacter	baumannii
GCF_000681855.1	Acinetobacter baumannii	Acinetobacter	469	Acinetobacter baumannii	470	Acinetobacter	baumannii
GCF_001612095.1	Acinetobacter baumannii	Acinetobacter	469	Acinetobacter baumannii	470	Acinetobacter	baumannii
GCF_000682635.1	Acinetobacter baumannii	Acinetobacter	469	Acinetobacter baumannii	470	Acinetobacter	baumannii
GCF_001432705.1	Acinetobacter baumannii	Acinetobacter	469	Acinetobacter baumannii	470	Acinetobacter	baumannii
GCF_000682235.1	Acinetobacter baumannii	Acinetobacter	469	Acinetobacter baumannii	470	Acinetobacter	baumannii
GCF_000588295.1	Acinetobacter baumannii	Acinetobacter	469	Acinetobacter baumannii	470	Acinetobacter	baumannii
GCF_000453205.1	Acinetobacter baumannii	Acinetobacter	469	Acinetobacter baumannii	470	Acinetobacter	baumannii
GCF_001617945.1	Acinetobacter baumannii	Acinetobacter	469	Acinetobacter baumannii	470	Acinetobacter	baumannii
GCF_000810045.3	Acinetobacter baumannii	Acinetobacter	469	Acinetobacter baumannii	470	Acinetobacter	baumannii
GCF_000583455.1	Acinetobacter baumannii	Acinetobacter	469	Acinetobacter baumannii	470	Acinetobacter	baumannii
GCF_000584895.1	Acinetobacter baumannii	Acinetobacter	469	Acinetobacter baumannii	470	Acinetobacter	baumannii
GCF_001432275.1	Acinetobacter baumannii	Acinetobacter	469	Acinetobacter baumannii	470	Acinetobacter	baumannii
GCF_000332855.1	Acinetobacter baumannii	Acinetobacter	469	Acinetobacter baumannii	470	Acinetobacter	baumannii
GCF_000588955.1	Acinetobacter baumannii	Acinetobacter	469	Acinetobacter baumannii	470	Acinetobacter	baumannii
GCF_001414655.1	Acinetobacter baumannii	Acinetobacter	469	Acinetobacter baumannii	470	Acinetobacter	baumannii
GCF_000810625.2	Acinetobacter baumannii	Acinetobacter	469	Acinetobacter baumannii	470	Acinetobacter	baumannii
GCF_001415065.1	Acinetobacter baumannii	Acinetobacter	469	Acinetobacter baumannii	470	Acinetobacter	baumannii
GCF_000681835.1	Acinetobacter baumannii	Acinetobacter	469	Acinetobacter baumannii	470	Acinetobacter	baumannii
GCF_000981405.1	Acinetobacter baumannii	Acinetobacter	469	Acinetobacter baumannii	470	Acinetobacter	baumannii
GCF_000301195.1	Acinetobacter baumannii	Acinetobacter	469	Acinetobacter baumannii	470	Acinetobacter	baumannii
GCF_000770815.1	Acinetobacter baumannii	Acinetobacter	469	Acinetobacter baumannii	470	Acinetobacter	baumannii
GCF_000804905.1	Acinetobacter baumannii	Acinetobacter	469	Acinetobacter baumannii	470	Acinetobacter	baumannii
GCF_000453285.1	Acinetobacter baumannii	Acinetobacter	469	Acinetobacter baumannii	470	Acinetobacter	baumannii
GCF_001414645.1	Acinetobacter baumannii	Acinetobacter	469	Acinetobacter baumannii	470	Acinetobacter	baumannii
GCF_000810065.3	Acinetobacter baumannii	Acinetobacter	469	Acinetobacter baumannii	470	Acinetobacter	baumannii
GCF_000611565.1	Acinetobacter baumannii	Acinetobacter	469	Acinetobacter baumannii	470	Acinetobacter	baumannii
GCF_000805215.1	Acinetobacter baumannii	Acinetobacter	469	Acinetobacter baumannii	470	Acinetobacter	baumannii
GCF_001414785.1	Acinetobacter baumannii	Acinetobacter	469	Acinetobacter baumannii	470	Acinetobacter	baumannii
GCF_001416165.1	Acinetobacter baumannii	Acinetobacter	469	Acinetobacter baumannii	470	Acinetobacter	baumannii
GCF_000804825.1	Acinetobacter baumannii	Acinetobacter	469	Acinetobacter baumannii	470	Acinetobacter	baumannii
GCF_000586655.1	Acinetobacter baumannii	Acinetobacter	469	Acinetobacter baumannii	470	Acinetobacter	baumannii
GCF_000760395.1	Acinetobacter baumannii	Acinetobacter	469	Acinetobacter baumannii	470	Acinetobacter	baumannii
GCF_000811325.3	Acinetobacter baumannii	Acinetobacter	469	Acinetobacter baumannii	470	Acinetobacter	baumannii
GCF_000584055.1	Acinetobacter baumannii	Acinetobacter	469	Acinetobacter baumannii	470	Acinetobacter	baumannii
GCF_000292545.1	Acinetobacter baumannii	Acinetobacter	469	Acinetobacter baumannii	470	Acinetobacter	baumannii
GCF_000302035.1	Acinetobacter baumannii	Acinetobacter	469	Acinetobacter baumannii	470	Acinetobacter	baumannii
GCF_000770805.1	Acinetobacter baumannii	Acinetobacter	469	Acinetobacter baumannii	470	Acinetobacter	baumannii
GCF_000810875.3	Acinetobacter baumannii	Acinetobacter	469	Acinetobacter baumannii	470	Acinetobacter	baumannii
GCF_000939555.1	Acinetobacter baumannii	Acinetobacter	469	Acinetobacter baumannii	470	Acinetobacter	baumannii
GCF_000515835.1	Acinetobacter baumannii	Acinetobacter	469	Acinetobacter baumannii	470	Acinetobacter	baumannii
GCF_000515555.1	Acinetobacter baumannii	Acinetobacter	469	Acinetobacter baumannii	470	Acinetobacter	baumannii
GCF_000302135.1	Acinetobacter baumannii	Acinetobacter	469	Acinetobacter baumannii	470	Acinetobacter	baumannii
GCF_000809705.3	Acinetobacter baumannii	Acinetobacter	469	Acinetobacter baumannii	470	Acinetobacter	baumannii
GCF_000515935.1	Acinetobacter baumannii	Acinetobacter	469	Acinetobacter baumannii	470	Acinetobacter	baumannii
GCF_000515815.1	Acinetobacter baumannii	Acinetobacter	469	Acinetobacter baumannii	470	Acinetobacter	baumannii
GCF_001612365.1	Acinetobacter baumannii	Acinetobacter	469	Acinetobacter baumannii	470	Acinetobacter	baumannii
GCF_001612025.1	Acinetobacter baumannii	Acinetobacter	469	Acinetobacter baumannii	470	Acinetobacter	baumannii
GCF_000760475.1	Acinetobacter baumannii	Acinetobacter	469	Acinetobacter baumannii	470	Acinetobacter	baumannii
GCF_000966525.1	Acinetobacter baumannii	Acinetobacter	469	Acinetobacter baumannii	470	Acinetobacter	baumannii
GCF_001028265.1	Acinetobacter baumannii	Acinetobacter	469	Acinetobacter baumannii	470	Acinetobacter	baumannii
GCF_001415015.1	Acinetobacter baumannii	Acinetobacter	469	Acinetobacter baumannii	470	Acinetobacter	baumannii
GCF_001399655.1	Acinetobacter baumannii	Acinetobacter	469	Acinetobacter baumannii	470	Acinetobacter	baumannii
GCF_000805045.1	Acinetobacter baumannii	Acinetobacter	469	Acinetobacter baumannii	470	Acinetobacter	baumannii
GCF_001007815.1	Acinetobacter baumannii	Acinetobacter	469	Acinetobacter baumannii	470	Acinetobacter	baumannii
GCF_001059495.1	Acinetobacter baumannii	Acinetobacter	469	Acinetobacter baumannii	470	Acinetobacter	baumannii
GCF_000580735.1	Acinetobacter baumannii	Acinetobacter	469	Acinetobacter baumannii	470	Acinetobacter	baumannii
GCF_000682435.1	Acinetobacter baumannii	Acinetobacter	469	Acinetobacter baumannii	470	Acinetobacter	baumannii
GCF_000453025.1	Acinetobacter baumannii	Acinetobacter	469	Acinetobacter baumannii	470	Acinetobacter	baumannii
GCF_000811565.3	Acinetobacter baumannii	Acinetobacter	469	Acinetobacter baumannii	470	Acinetobacter	baumannii
GCF_000581355.1	Acinetobacter baumannii	Acinetobacter	469	Acinetobacter baumannii	470	Acinetobacter	baumannii
GCF_000335615.1	Acinetobacter baumannii	Acinetobacter	469	Acinetobacter baumannii	470	Acinetobacter	baumannii
GCF_000600455.1	Acinetobacter baumannii	Acinetobacter	469	Acinetobacter baumannii	470	Acinetobacter	baumannii
GCF_000810505.3	Acinetobacter baumannii	Acinetobacter	469	Acinetobacter baumannii	470	Acinetobacter	baumannii
GCF_000353815.1	Acinetobacter baumannii	Acinetobacter	469	Acinetobacter baumannii	470	Acinetobacter	baumannii
GCF_000583335.1	Acinetobacter baumannii	Acinetobacter	469	Acinetobacter baumannii	470	Acinetobacter	baumannii
GCF_000241725.1	Acinetobacter baumannii	Acinetobacter	469	Acinetobacter baumannii	470	Acinetobacter	baumannii
GCF_000453265.1	Acinetobacter baumannii	Acinetobacter	469	Acinetobacter baumannii	470	Acinetobacter	baumannii
GCF_000808775.3	Acinetobacter baumannii	Acinetobacter	469	Acinetobacter baumannii	470	Acinetobacter	baumannii
GCF_000722985.1	Acinetobacter baumannii	Acinetobacter	469	Acinetobacter baumannii	470	Acinetobacter	baumannii
GCF_001511895.1	Acinetobacter baumannii	Acinetobacter	469	Acinetobacter baumannii	470	Acinetobacter	baumannii
GCF_000611165.1	Acinetobacter baumannii	Acinetobacter	469	Acinetobacter baumannii	470	Acinetobacter	baumannii
GCF_000278605.1	Acinetobacter baumannii	Acinetobacter	469	Acinetobacter baumannii	470	Acinetobacter	baumannii
GCF_001415785.1	Acinetobacter baumannii	Acinetobacter	469	Acinetobacter baumannii	470	Acinetobacter	baumannii
GCF_000682455.1	Acinetobacter baumannii	Acinetobacter	469	Acinetobacter baumannii	470	Acinetobacter	baumannii
GCF_000516575.2	Acinetobacter baumannii	Acinetobacter	469	Acinetobacter baumannii	470	Acinetobacter	baumannii
GCF_001028335.1	Acinetobacter baumannii	Acinetobacter	469	Acinetobacter baumannii	470	Acinetobacter	baumannii
GCF_000600875.1	Acinetobacter baumannii	Acinetobacter	469	Acinetobacter baumannii	470	Acinetobacter	baumannii
GCF_000413915.1	Acinetobacter baumannii	Acinetobacter	469	Acinetobacter baumannii	470	Acinetobacter	baumannii
GCF_000581615.1	Acinetobacter baumannii	Acinetobacter	469	Acinetobacter baumannii	470	Acinetobacter	baumannii
GCF_000453665.1	Acinetobacter baumannii	Acinetobacter	469	Acinetobacter baumannii	470	Acinetobacter	baumannii
GCF_000588155.1	Acinetobacter baumannii	Acinetobacter	469	Acinetobacter baumannii	470	Acinetobacter	baumannii
GCF_000584095.1	Acinetobacter baumannii	Acinetobacter	469	Acinetobacter baumannii	470	Acinetobacter	baumannii
GCF_000671575.1	Acinetobacter baumannii	Acinetobacter	469	Acinetobacter baumannii	470	Acinetobacter	baumannii
GCF_000299655.1	Acinetobacter baumannii	Acinetobacter	469	Acinetobacter baumannii	470	Acinetobacter	baumannii
GCF_000302175.1	Acinetobacter baumannii	Acinetobacter	469	Acinetobacter baumannii	470	Acinetobacter	baumannii
GCF_001541685.1	Acinetobacter baumannii	Acinetobacter	469	Acinetobacter baumannii	470	Acinetobacter	baumannii
GCF_000454005.1	Acinetobacter baumannii	Acinetobacter	469	Acinetobacter baumannii	470	Acinetobacter	baumannii
GCF_001417545.1	Acinetobacter baumannii	Acinetobacter	469	Acinetobacter baumannii	470	Acinetobacter	baumannii
GCF_000186645.1	Acinetobacter baumannii	Acinetobacter	469	Acinetobacter baumannii	470	Acinetobacter	baumannii
GCF_000453925.1	Acinetobacter baumannii	Acinetobacter	469	Acinetobacter baumannii	470	Acinetobacter	baumannii
GCF_001415765.1	Acinetobacter baumannii	Acinetobacter	469	Acinetobacter baumannii	470	Acinetobacter	baumannii
GCF_000611205.1	Acinetobacter baumannii	Acinetobacter	469	Acinetobacter baumannii	470	Acinetobacter	baumannii
GCF_000808845.3	Acinetobacter baumannii	Acinetobacter	469	Acinetobacter baumannii	470	Acinetobacter	baumannii
GCF_000515735.1	Acinetobacter baumannii	Acinetobacter	469	Acinetobacter baumannii	470	Acinetobacter	baumannii
GCF_000682555.1	Acinetobacter baumannii	Acinetobacter	469	Acinetobacter baumannii	470	Acinetobacter	baumannii
GCF_001612435.1	Acinetobacter baumannii	Acinetobacter	469	Acinetobacter baumannii	470	Acinetobacter	baumannii
GCF_001573085.1	Acinetobacter baumannii	Acinetobacter	469	Acinetobacter baumannii	470	Acinetobacter	baumannii
GCF_000021145.1	Acinetobacter baumannii	Acinetobacter	469	Acinetobacter baumannii	470	Acinetobacter	baumannii
GCF_000682055.1	Acinetobacter baumannii	Acinetobacter	469	Acinetobacter baumannii	470	Acinetobacter	baumannii
GCF_001415515.1	Acinetobacter baumannii	Acinetobacter	469	Acinetobacter baumannii	470	Acinetobacter	baumannii
GCF_000588795.1	Acinetobacter baumannii	Acinetobacter	469	Acinetobacter baumannii	470	Acinetobacter	baumannii
GCF_000949065.2	Acinetobacter baumannii	Acinetobacter	469	Acinetobacter baumannii	470	Acinetobacter	baumannii
GCF_000581635.1	Acinetobacter baumannii	Acinetobacter	469	Acinetobacter baumannii	470	Acinetobacter	baumannii
GCF_000811205.3	Acinetobacter baumannii	Acinetobacter	469	Acinetobacter baumannii	470	Acinetobacter	baumannii
GCF_001500225.1	Acinetobacter baumannii	Acinetobacter	469	Acinetobacter baumannii	470	Acinetobacter	baumannii
GCF_001416145.1	Acinetobacter baumannii	Acinetobacter	469	Acinetobacter baumannii	470	Acinetobacter	baumannii
GCF_001077565.1	Acinetobacter baumannii	Acinetobacter	469	Acinetobacter baumannii	470	Acinetobacter	baumannii
GCF_000583255.1	Acinetobacter baumannii	Acinetobacter	469	Acinetobacter baumannii	470	Acinetobacter	baumannii
GCF_000184475.1	Acinetobacter baumannii	Acinetobacter	469	Acinetobacter baumannii	470	Acinetobacter	baumannii
GCF_000681735.1	Acinetobacter baumannii	Acinetobacter	469	Acinetobacter baumannii	470	Acinetobacter	baumannii
GCF_000592635.1	Acinetobacter baumannii	Acinetobacter	469	Acinetobacter baumannii	470	Acinetobacter	baumannii
GCF_000811865.3	Acinetobacter baumannii	Acinetobacter	469	Acinetobacter baumannii	470	Acinetobacter	baumannii
GCF_000810185.3	Acinetobacter baumannii	Acinetobacter	469	Acinetobacter baumannii	470	Acinetobacter	baumannii
GCF_001433335.1	Acinetobacter baumannii	Acinetobacter	469	Acinetobacter baumannii	470	Acinetobacter	baumannii
GCF_000589835.1	Acinetobacter baumannii	Acinetobacter	469	Acinetobacter baumannii	470	Acinetobacter	baumannii
GCF_000354075.1	Acinetobacter baumannii	Acinetobacter	469	Acinetobacter baumannii	470	Acinetobacter	baumannii
GCF_000757665.1	Acinetobacter baumannii	Acinetobacter	469	Acinetobacter baumannii	470	Acinetobacter	baumannii
GCF_000581755.1	Acinetobacter baumannii	Acinetobacter	469	Acinetobacter baumannii	470	Acinetobacter	baumannii
GCF_000671595.1	Acinetobacter baumannii	Acinetobacter	469	Acinetobacter baumannii	470	Acinetobacter	baumannii
GCF_000516015.1	Acinetobacter baumannii	Acinetobacter	469	Acinetobacter baumannii	470	Acinetobacter	baumannii
GCF_000681935.1	Acinetobacter baumannii	Acinetobacter	469	Acinetobacter baumannii	470	Acinetobacter	baumannii
GCF_001414885.1	Acinetobacter baumannii	Acinetobacter	469	Acinetobacter baumannii	470	Acinetobacter	baumannii
GCF_000611305.1	Acinetobacter baumannii	Acinetobacter	469	Acinetobacter baumannii	470	Acinetobacter	baumannii
GCF_001415295.1	Acinetobacter baumannii	Acinetobacter	469	Acinetobacter baumannii	470	Acinetobacter	baumannii
GCF_000580195.1	Acinetobacter baumannii	Acinetobacter	469	Acinetobacter baumannii	470	Acinetobacter	baumannii
GCF_000222245.1	Acinetobacter baumannii	Acinetobacter	469	Acinetobacter baumannii	470	Acinetobacter	baumannii
GCF_000939425.1	Acinetobacter baumannii	Acinetobacter	469	Acinetobacter baumannii	470	Acinetobacter	baumannii
GCF_000805115.1	Acinetobacter baumannii	Acinetobacter	469	Acinetobacter baumannii	470	Acinetobacter	baumannii
GCF_000805515.1	Acinetobacter baumannii	Acinetobacter	469	Acinetobacter baumannii	470	Acinetobacter	baumannii
GCF_000591575.1	Acinetobacter baumannii	Acinetobacter	469	Acinetobacter baumannii	470	Acinetobacter	baumannii
GCF_000581315.1	Acinetobacter baumannii	Acinetobacter	469	Acinetobacter baumannii	470	Acinetobacter	baumannii
GCF_000591635.1	Acinetobacter baumannii	Acinetobacter	469	Acinetobacter baumannii	470	Acinetobacter	baumannii
GCF_000163375.2	Acinetobacter baumannii	Acinetobacter	469	Acinetobacter baumannii	470	Acinetobacter	baumannii
GCF_000588135.1	Acinetobacter baumannii	Acinetobacter	469	Acinetobacter baumannii	470	Acinetobacter	baumannii
GCF_000465635.2	Acinetobacter baumannii	Acinetobacter	469	Acinetobacter baumannii	470	Acinetobacter	baumannii
GCF_000808905.3	Acinetobacter baumannii	Acinetobacter	469	Acinetobacter baumannii	470	Acinetobacter	baumannii
GCF_000581295.1	Acinetobacter baumannii	Acinetobacter	469	Acinetobacter baumannii	470	Acinetobacter	baumannii
GCF_000592455.1	Acinetobacter baumannii	Acinetobacter	469	Acinetobacter baumannii	470	Acinetobacter	baumannii
GCF_000804805.1	Acinetobacter baumannii	Acinetobacter	469	Acinetobacter baumannii	470	Acinetobacter	baumannii
GCF_001541875.1	Acinetobacter baumannii	Acinetobacter	469	Acinetobacter baumannii	470	Acinetobacter	baumannii
GCF_000794125.1	Acinetobacter baumannii	Acinetobacter	469	Acinetobacter baumannii	470	Acinetobacter	baumannii
GCF_000302255.1	Acinetobacter baumannii	Acinetobacter	469	Acinetobacter baumannii	470	Acinetobacter	baumannii
GCF_000770785.1	Acinetobacter baumannii	Acinetobacter	469	Acinetobacter baumannii	470	Acinetobacter	baumannii
GCF_000588215.1	Acinetobacter baumannii	Acinetobacter	469	Acinetobacter baumannii	470	Acinetobacter	baumannii
GCF_000804975.1	Acinetobacter baumannii	Acinetobacter	469	Acinetobacter baumannii	470	Acinetobacter	baumannii
GCF_000627355.1	Acinetobacter baumannii	Acinetobacter	469	Acinetobacter baumannii	470	Acinetobacter	baumannii
GCF_000297535.1	Acinetobacter baumannii	Acinetobacter	469	Acinetobacter baumannii	470	Acinetobacter	baumannii
GCF_000516255.1	Acinetobacter baumannii	Acinetobacter	469	Acinetobacter baumannii	470	Acinetobacter	baumannii
GCF_001514375.1	Acinetobacter baumannii	Acinetobacter	469	Acinetobacter baumannii	470	Acinetobacter	baumannii
GCF_000588375.1	Acinetobacter baumannii	Acinetobacter	469	Acinetobacter baumannii	470	Acinetobacter	baumannii
GCF_000809745.3	Acinetobacter baumannii	Acinetobacter	469	Acinetobacter baumannii	470	Acinetobacter	baumannii
GCF_000248275.1	Acinetobacter baumannii	Acinetobacter	469	Acinetobacter baumannii	470	Acinetobacter	baumannii
GCF_000591595.1	Acinetobacter baumannii	Acinetobacter	469	Acinetobacter baumannii	470	Acinetobacter	baumannii
GCF_000580295.1	Acinetobacter baumannii	Acinetobacter	469	Acinetobacter baumannii	470	Acinetobacter	baumannii
GCF_000611085.1	Acinetobacter baumannii	Acinetobacter	469	Acinetobacter baumannii	470	Acinetobacter	baumannii
GCF_000592115.1	Acinetobacter baumannii	Acinetobacter	469	Acinetobacter baumannii	470	Acinetobacter	baumannii
GCF_000301295.1	Acinetobacter baumannii	Acinetobacter	469	Acinetobacter baumannii	470	Acinetobacter	baumannii
GCF_001612215.1	Acinetobacter baumannii	Acinetobacter	469	Acinetobacter baumannii	470	Acinetobacter	baumannii
GCF_001433145.1	Acinetobacter baumannii	Acinetobacter	469	Acinetobacter baumannii	470	Acinetobacter	baumannii
GCF_001611995.1	Acinetobacter baumannii	Acinetobacter	469	Acinetobacter baumannii	470	Acinetobacter	baumannii
GCF_000966505.1	Acinetobacter baumannii	Acinetobacter	469	Acinetobacter baumannii	470	Acinetobacter	baumannii
GCF_000580995.1	Acinetobacter baumannii	Acinetobacter	469	Acinetobacter baumannii	470	Acinetobacter	baumannii
GCF_000809565.3	Acinetobacter baumannii	Acinetobacter	469	Acinetobacter baumannii	470	Acinetobacter	baumannii
GCF_000359725.1	Acinetobacter baumannii	Acinetobacter	469	Acinetobacter baumannii	470	Acinetobacter	baumannii
GCF_000876095.1	Acinetobacter baumannii	Acinetobacter	469	Acinetobacter baumannii	470	Acinetobacter	baumannii
GCF_001415965.1	Acinetobacter baumannii	Acinetobacter	469	Acinetobacter baumannii	470	Acinetobacter	baumannii
GCF_000808885.3	Acinetobacter baumannii	Acinetobacter	469	Acinetobacter baumannii	470	Acinetobacter	baumannii
GCF_001433655.1	Acinetobacter baumannii	Acinetobacter	469	Acinetobacter baumannii	470	Acinetobacter	baumannii
GCF_001617885.1	Acinetobacter baumannii	Acinetobacter	469	Acinetobacter baumannii	470	Acinetobacter	baumannii
GCF_000805305.1	Acinetobacter baumannii	Acinetobacter	469	Acinetobacter baumannii	470	Acinetobacter	baumannii
GCF_000811825.3	Acinetobacter baumannii	Acinetobacter	469	Acinetobacter baumannii	470	Acinetobacter	baumannii
GCF_000297595.1	Acinetobacter baumannii	Acinetobacter	469	Acinetobacter baumannii	470	Acinetobacter	baumannii
GCF_000580175.1	Acinetobacter baumannii	Acinetobacter	469	Acinetobacter baumannii	470	Acinetobacter	baumannii
GCF_000581015.1	Acinetobacter baumannii	Acinetobacter	469	Acinetobacter baumannii	470	Acinetobacter	baumannii
GCF_000301935.1	Acinetobacter baumannii	Acinetobacter	469	Acinetobacter baumannii	470	Acinetobacter	baumannii
GCF_000584115.1	Acinetobacter baumannii	Acinetobacter	469	Acinetobacter baumannii	470	Acinetobacter	baumannii
GCF_000811765.3	Acinetobacter baumannii	Acinetobacter	469	Acinetobacter baumannii	470	Acinetobacter	baumannii
GCF_000592655.1	Acinetobacter baumannii	Acinetobacter	469	Acinetobacter baumannii	470	Acinetobacter	baumannii
GCF_000591975.1	Acinetobacter baumannii	Acinetobacter	469	Acinetobacter baumannii	470	Acinetobacter	baumannii
GCF_001416585.1	Acinetobacter baumannii	Acinetobacter	469	Acinetobacter baumannii	470	Acinetobacter	baumannii
GCF_001446715.1	Acinetobacter baumannii	Acinetobacter	469	Acinetobacter baumannii	470	Acinetobacter	baumannii
GCF_000587955.1	Acinetobacter baumannii	Acinetobacter	469	Acinetobacter baumannii	470	Acinetobacter	baumannii
GCF_000600415.1	Acinetobacter baumannii	Acinetobacter	469	Acinetobacter baumannii	470	Acinetobacter	baumannii
GCF_000515455.1	Acinetobacter baumannii	Acinetobacter	469	Acinetobacter baumannii	470	Acinetobacter	baumannii
GCF_001414865.1	Acinetobacter baumannii	Acinetobacter	469	Acinetobacter baumannii	470	Acinetobacter	baumannii
GCF_000301275.1	Acinetobacter baumannii	Acinetobacter	469	Acinetobacter baumannii	470	Acinetobacter	baumannii
GCF_001432265.1	Acinetobacter baumannii	Acinetobacter	469	Acinetobacter baumannii	470	Acinetobacter	baumannii
GCF_001612315.1	Acinetobacter baumannii	Acinetobacter	469	Acinetobacter baumannii	470	Acinetobacter	baumannii
GCF_001414565.1	Acinetobacter baumannii	Acinetobacter	469	Acinetobacter baumannii	470	Acinetobacter	baumannii
GCF_000611385.1	Acinetobacter baumannii	Acinetobacter	469	Acinetobacter baumannii	470	Acinetobacter	baumannii
GCF_000453825.1	Acinetobacter baumannii	Acinetobacter	469	Acinetobacter baumannii	470	Acinetobacter	baumannii
GCF_000810545.3	Acinetobacter baumannii	Acinetobacter	469	Acinetobacter baumannii	470	Acinetobacter	baumannii
GCF_000584515.1	Acinetobacter baumannii	Acinetobacter	469	Acinetobacter baumannii	470	Acinetobacter	baumannii
GCF_001052675.1	Acinetobacter baumannii	Acinetobacter	469	Acinetobacter baumannii	470	Acinetobacter	baumannii
GCF_000681955.1	Acinetobacter baumannii	Acinetobacter	469	Acinetobacter baumannii	470	Acinetobacter	baumannii
GCF_000584155.1	Acinetobacter baumannii	Acinetobacter	469	Acinetobacter baumannii	470	Acinetobacter	baumannii
GCF_000809325.3	Acinetobacter baumannii	Acinetobacter	469	Acinetobacter baumannii	470	Acinetobacter	baumannii
GCF_000969465.1	Acinetobacter baumannii	Acinetobacter	469	Acinetobacter baumannii	470	Acinetobacter	baumannii
GCF_000810745.3	Acinetobacter baumannii	Acinetobacter	469	Acinetobacter baumannii	470	Acinetobacter	baumannii
GCF_000963815.1	Acinetobacter baumannii	Acinetobacter	469	Acinetobacter baumannii	470	Acinetobacter	baumannii
GCF_000671455.1	Acinetobacter baumannii	Acinetobacter	469	Acinetobacter baumannii	470	Acinetobacter	baumannii
GCF_001414985.1	Acinetobacter baumannii	Acinetobacter	469	Acinetobacter baumannii	470	Acinetobacter	baumannii
GCF_000453765.1	Acinetobacter baumannii	Acinetobacter	469	Acinetobacter baumannii	470	Acinetobacter	baumannii
GCF_001531205.1	Acinetobacter baumannii	Acinetobacter	469	Acinetobacter baumannii	470	Acinetobacter	baumannii
GCF_000966495.1	Acinetobacter baumannii	Acinetobacter	469	Acinetobacter baumannii	470	Acinetobacter	baumannii
GCF_000581795.1	Acinetobacter baumannii	Acinetobacter	469	Acinetobacter baumannii	470	Acinetobacter	baumannii
GCF_000309155.1	Acinetobacter baumannii	Acinetobacter	469	Acinetobacter baumannii	470	Acinetobacter	baumannii
GCF_000809725.3	Acinetobacter baumannii	Acinetobacter	469	Acinetobacter baumannii	470	Acinetobacter	baumannii
GCF_001612285.1	Acinetobacter baumannii	Acinetobacter	469	Acinetobacter baumannii	470	Acinetobacter	baumannii
GCF_000939405.1	Acinetobacter baumannii	Acinetobacter	469	Acinetobacter baumannii	470	Acinetobacter	baumannii
GCF_000939635.1	Acinetobacter baumannii	Acinetobacter	469	Acinetobacter baumannii	470	Acinetobacter	baumannii
GCF_000453085.1	Acinetobacter baumannii	Acinetobacter	469	Acinetobacter baumannii	470	Acinetobacter	baumannii
GCF_000453445.1	Acinetobacter baumannii	Acinetobacter	469	Acinetobacter baumannii	470	Acinetobacter	baumannii
GCF_000808815.3	Acinetobacter baumannii	Acinetobacter	469	Acinetobacter baumannii	470	Acinetobacter	baumannii
GCF_000515655.1	Acinetobacter baumannii	Acinetobacter	469	Acinetobacter baumannii	470	Acinetobacter	baumannii
GCF_001416555.1	Acinetobacter baumannii	Acinetobacter	469	Acinetobacter baumannii	470	Acinetobacter	baumannii
GCF_000304655.1	Acinetobacter baumannii	Acinetobacter	469	Acinetobacter baumannii	470	Acinetobacter	baumannii
GCF_000453785.1	Acinetobacter baumannii	Acinetobacter	469	Acinetobacter baumannii	470	Acinetobacter	baumannii
GCF_000516635.2	Acinetobacter baumannii	Acinetobacter	469	Acinetobacter baumannii	470	Acinetobacter	baumannii
GCF_000760435.1	Acinetobacter baumannii	Acinetobacter	469	Acinetobacter baumannii	470	Acinetobacter	baumannii
GCF_001415645.1	Acinetobacter baumannii	Acinetobacter	469	Acinetobacter baumannii	470	Acinetobacter	baumannii
GCF_000811805.3	Acinetobacter baumannii	Acinetobacter	469	Acinetobacter baumannii	470	Acinetobacter	baumannii
GCF_000304695.1	Acinetobacter baumannii	Acinetobacter	469	Acinetobacter baumannii	470	Acinetobacter	baumannii
GCF_000353955.1	Acinetobacter baumannii	Acinetobacter	469	Acinetobacter baumannii	470	Acinetobacter	baumannii
GCF_001416665.1	Acinetobacter baumannii	Acinetobacter	469	Acinetobacter baumannii	470	Acinetobacter	baumannii
GCF_001416275.1	Acinetobacter baumannii	Acinetobacter	469	Acinetobacter baumannii	470	Acinetobacter	baumannii
GCF_000591855.1	Acinetobacter baumannii	Acinetobacter	469	Acinetobacter baumannii	470	Acinetobacter	baumannii
GCF_000580755.1	Acinetobacter baumannii	Acinetobacter	469	Acinetobacter baumannii	470	Acinetobacter	baumannii
GCF_000761175.1	Acinetobacter baumannii	Acinetobacter	469	Acinetobacter baumannii	470	Acinetobacter	baumannii
GCF_000810565.3	Acinetobacter baumannii	Acinetobacter	469	Acinetobacter baumannii	470	Acinetobacter	baumannii
GCF_000805225.1	Acinetobacter baumannii	Acinetobacter	469	Acinetobacter baumannii	470	Acinetobacter	baumannii
GCF_000517505.1	Acinetobacter baumannii	Acinetobacter	469	Acinetobacter baumannii	470	Acinetobacter	baumannii
GCF_000592575.1	Acinetobacter baumannii	Acinetobacter	469	Acinetobacter baumannii	470	Acinetobacter	baumannii
GCF_001007775.1	Acinetobacter baumannii	Acinetobacter	469	Acinetobacter baumannii	470	Acinetobacter	baumannii
GCF_000808765.2	Acinetobacter baumannii	Acinetobacter	469	Acinetobacter baumannii	470	Acinetobacter	baumannii
GCF_000804955.1	Acinetobacter baumannii	Acinetobacter	469	Acinetobacter baumannii	470	Acinetobacter	baumannii
GCF_000810865.3	Acinetobacter baumannii	Acinetobacter	469	Acinetobacter baumannii	470	Acinetobacter	baumannii
GCF_000600375.1	Acinetobacter baumannii	Acinetobacter	469	Acinetobacter baumannii	470	Acinetobacter	baumannii
GCF_001432385.1	Acinetobacter baumannii	Acinetobacter	469	Acinetobacter baumannii	470	Acinetobacter	baumannii
GCF_001432535.1	Acinetobacter baumannii	Acinetobacter	469	Acinetobacter baumannii	470	Acinetobacter	baumannii
GCF_001531135.1	Acinetobacter baumannii	Acinetobacter	469	Acinetobacter baumannii	470	Acinetobacter	baumannii
GCF_000297935.1	Acinetobacter baumannii	Acinetobacter	469	Acinetobacter baumannii	470	Acinetobacter	baumannii
GCF_000584495.1	Acinetobacter baumannii	Acinetobacter	469	Acinetobacter baumannii	470	Acinetobacter	baumannii
GCF_000682015.1	Acinetobacter baumannii	Acinetobacter	469	Acinetobacter baumannii	470	Acinetobacter	baumannii
GCF_000810445.3	Acinetobacter baumannii	Acinetobacter	469	Acinetobacter baumannii	470	Acinetobacter	baumannii
GCF_000581915.1	Acinetobacter baumannii	Acinetobacter	469	Acinetobacter baumannii	470	Acinetobacter	baumannii
GCF_001432665.1	Acinetobacter baumannii	Acinetobacter	469	Acinetobacter baumannii	470	Acinetobacter	baumannii
GCF_000611345.1	Acinetobacter baumannii	Acinetobacter	469	Acinetobacter baumannii	470	Acinetobacter	baumannii
GCF_000453185.1	Acinetobacter baumannii	Acinetobacter	469	Acinetobacter baumannii	470	Acinetobacter	baumannii
GCF_000809765.3	Acinetobacter baumannii	Acinetobacter	469	Acinetobacter baumannii	470	Acinetobacter	baumannii
GCF_000627515.1	Acinetobacter baumannii	Acinetobacter	469	Acinetobacter baumannii	470	Acinetobacter	baumannii
GCF_000301435.1	Acinetobacter baumannii	Acinetobacter	469	Acinetobacter baumannii	470	Acinetobacter	baumannii
GCF_000811665.3	Acinetobacter baumannii	Acinetobacter	469	Acinetobacter baumannii	470	Acinetobacter	baumannii
GCF_000592735.1	Acinetobacter baumannii	Acinetobacter	469	Acinetobacter baumannii	470	Acinetobacter	baumannii
GCF_000189675.1	Acinetobacter baumannii	Acinetobacter	469	Acinetobacter baumannii	470	Acinetobacter	baumannii
GCF_000369185.1	Acinetobacter baumannii	Acinetobacter	469	Acinetobacter baumannii	470	Acinetobacter	baumannii
GCF_000286535.1	Acinetobacter baumannii	Acinetobacter	469	Acinetobacter baumannii	470	Acinetobacter	baumannii
GCF_000805595.1	Acinetobacter baumannii	Acinetobacter	469	Acinetobacter baumannii	470	Acinetobacter	baumannii
GCF_001441625.1	Acinetobacter baumannii	Acinetobacter	469	Acinetobacter baumannii	470	Acinetobacter	baumannii
GCF_000681555.1	Acinetobacter baumannii	Acinetobacter	469	Acinetobacter baumannii	470	Acinetobacter	baumannii
GCF_000177695.1	Acinetobacter baumannii	Acinetobacter	469	Acinetobacter baumannii	470	Acinetobacter	baumannii
GCF_000309235.1	Acinetobacter baumannii	Acinetobacter	469	Acinetobacter baumannii	470	Acinetobacter	baumannii
GCF_001612075.1	Acinetobacter baumannii	Acinetobacter	469	Acinetobacter baumannii	470	Acinetobacter	baumannii
GCF_000505685.1	Acinetobacter baumannii	Acinetobacter	469	Acinetobacter baumannii	470	Acinetobacter	baumannii
GCF_000515595.1	Acinetobacter baumannii	Acinetobacter	469	Acinetobacter baumannii	470	Acinetobacter	baumannii
GCF_000301875.1	Acinetobacter baumannii	Acinetobacter	469	Acinetobacter baumannii	470	Acinetobacter	baumannii
GCF_001028325.1	Acinetobacter baumannii	Acinetobacter	469	Acinetobacter baumannii	470	Acinetobacter	baumannii
GCF_000583435.1	Acinetobacter baumannii	Acinetobacter	469	Acinetobacter baumannii	470	Acinetobacter	baumannii
GCF_000600555.1	Acinetobacter baumannii	Acinetobacter	469	Acinetobacter baumannii	470	Acinetobacter	baumannii
GCF_000949045.2	Acinetobacter baumannii	Acinetobacter	469	Acinetobacter baumannii	470	Acinetobacter	baumannii
GCF_000584675.1	Acinetobacter baumannii	Acinetobacter	469	Acinetobacter baumannii	470	Acinetobacter	baumannii
GCF_001415815.1	Acinetobacter baumannii	Acinetobacter	469	Acinetobacter baumannii	470	Acinetobacter	baumannii
GCF_001441465.1	Acinetobacter baumannii	Acinetobacter	469	Acinetobacter baumannii	470	Acinetobacter	baumannii
GCF_000809405.3	Acinetobacter baumannii	Acinetobacter	469	Acinetobacter baumannii	470	Acinetobacter	baumannii
GCF_000591895.1	Acinetobacter baumannii	Acinetobacter	469	Acinetobacter baumannii	470	Acinetobacter	baumannii
GCF_000966305.1	Acinetobacter baumannii	Acinetobacter	469	Acinetobacter baumannii	470	Acinetobacter	baumannii
GCF_000588975.1	Acinetobacter baumannii	Acinetobacter	469	Acinetobacter baumannii	470	Acinetobacter	baumannii
GCF_000802895.1	Acinetobacter baumannii	Acinetobacter	469	Acinetobacter baumannii	470	Acinetobacter	baumannii
GCF_000589595.1	Acinetobacter baumannii	Acinetobacter	469	Acinetobacter baumannii	470	Acinetobacter	baumannii
GCF_001052015.1	Acinetobacter baumannii	Acinetobacter	469	Acinetobacter baumannii	470	Acinetobacter	baumannii
GCF_000453165.1	Acinetobacter baumannii	Acinetobacter	469	Acinetobacter baumannii	470	Acinetobacter	baumannii
GCF_000592075.1	Acinetobacter baumannii	Acinetobacter	469	Acinetobacter baumannii	470	Acinetobacter	baumannii
GCF_000591795.1	Acinetobacter baumannii	Acinetobacter	469	Acinetobacter baumannii	470	Acinetobacter	baumannii
GCF_000580215.1	Acinetobacter baumannii	Acinetobacter	469	Acinetobacter baumannii	470	Acinetobacter	baumannii
GCF_001612175.1	Acinetobacter baumannii	Acinetobacter	469	Acinetobacter baumannii	470	Acinetobacter	baumannii
GCF_000302075.1	Acinetobacter baumannii	Acinetobacter	469	Acinetobacter baumannii	470	Acinetobacter	baumannii
GCF_000581455.1	Acinetobacter baumannii	Acinetobacter	469	Acinetobacter baumannii	470	Acinetobacter	baumannii
GCF_000515995.2	Acinetobacter baumannii	Acinetobacter	469	Acinetobacter baumannii	470	Acinetobacter	baumannii
GCF_000591935.1	Acinetobacter baumannii	Acinetobacter	469	Acinetobacter baumannii	470	Acinetobacter	baumannii
GCF_001441455.1	Acinetobacter baumannii	Acinetobacter	469	Acinetobacter baumannii	470	Acinetobacter	baumannii
GCF_000582215.1	Acinetobacter baumannii	Acinetobacter	469	Acinetobacter baumannii	470	Acinetobacter	baumannii
GCF_000368225.1	Acinetobacter baumannii	Acinetobacter	469	Acinetobacter baumannii	470	Acinetobacter	baumannii
GCF_000581435.1	Acinetobacter baumannii	Acinetobacter	469	Acinetobacter baumannii	470	Acinetobacter	baumannii
GCF_000810585.3	Acinetobacter baumannii	Acinetobacter	469	Acinetobacter baumannii	470	Acinetobacter	baumannii
GCF_000589435.1	Acinetobacter baumannii	Acinetobacter	469	Acinetobacter baumannii	470	Acinetobacter	baumannii
GCF_000354135.1	Acinetobacter baumannii	Acinetobacter	469	Acinetobacter baumannii	470	Acinetobacter	baumannii
GCF_000580895.1	Acinetobacter baumannii	Acinetobacter	469	Acinetobacter baumannii	470	Acinetobacter	baumannii
GCF_000810245.3	Acinetobacter baumannii	Acinetobacter	469	Acinetobacter baumannii	470	Acinetobacter	baumannii
GCF_000811745.3	Acinetobacter baumannii	Acinetobacter	469	Acinetobacter baumannii	470	Acinetobacter	baumannii
GCF_000810145.3	Acinetobacter baumannii	Acinetobacter	469	Acinetobacter baumannii	470	Acinetobacter	baumannii
GCF_000584195.1	Acinetobacter baumannii	Acinetobacter	469	Acinetobacter baumannii	470	Acinetobacter	baumannii
GCF_000592095.1	Acinetobacter baumannii	Acinetobacter	469	Acinetobacter baumannii	470	Acinetobacter	baumannii
GCF_001512015.1	Acinetobacter baumannii	Acinetobacter	469	Acinetobacter baumannii	470	Acinetobacter	baumannii
GCF_000513795.2	Acinetobacter baumannii	Acinetobacter	469	Acinetobacter baumannii	470	Acinetobacter	baumannii
GCF_001416475.1	Acinetobacter baumannii	Acinetobacter	469	Acinetobacter baumannii	470	Acinetobacter	baumannii
GCF_000682035.1	Acinetobacter baumannii	Acinetobacter	469	Acinetobacter baumannii	470	Acinetobacter	baumannii
GCF_000810995.3	Acinetobacter baumannii	Acinetobacter	469	Acinetobacter baumannii	470	Acinetobacter	baumannii
GCF_000162295.1	Acinetobacter baumannii	Acinetobacter	469	Acinetobacter baumannii	470	Acinetobacter	baumannii
GCF_000581515.1	Acinetobacter baumannii	Acinetobacter	469	Acinetobacter baumannii	470	Acinetobacter	baumannii
GCF_001511975.1	Acinetobacter baumannii	Acinetobacter	469	Acinetobacter baumannii	470	Acinetobacter	baumannii
GCF_000681575.1	Acinetobacter baumannii	Acinetobacter	469	Acinetobacter baumannii	470	Acinetobacter	baumannii
GCF_001573125.1	Acinetobacter baumannii	Acinetobacter	469	Acinetobacter baumannii	470	Acinetobacter	baumannii
GCF_000587915.1	Acinetobacter baumannii	Acinetobacter	469	Acinetobacter baumannii	470	Acinetobacter	baumannii
GCF_000453225.1	Acinetobacter baumannii	Acinetobacter	469	Acinetobacter baumannii	470	Acinetobacter	baumannii
GCF_000369285.1	Acinetobacter baumannii	Acinetobacter	469	Acinetobacter baumannii	470	Acinetobacter	baumannii
GCF_000810165.3	Acinetobacter baumannii	Acinetobacter	469	Acinetobacter baumannii	470	Acinetobacter	baumannii
GCF_000453845.1	Acinetobacter baumannii	Acinetobacter	469	Acinetobacter baumannii	470	Acinetobacter	baumannii
GCF_000682255.1	Acinetobacter baumannii	Acinetobacter	469	Acinetobacter baumannii	470	Acinetobacter	baumannii
GCF_000581155.1	Acinetobacter baumannii	Acinetobacter	469	Acinetobacter baumannii	470	Acinetobacter	baumannii
GCF_000681615.1	Acinetobacter baumannii	Acinetobacter	469	Acinetobacter baumannii	470	Acinetobacter	baumannii
GCF_000682475.1	Acinetobacter baumannii	Acinetobacter	469	Acinetobacter baumannii	470	Acinetobacter	baumannii
GCF_000611425.1	Acinetobacter baumannii	Acinetobacter	469	Acinetobacter baumannii	470	Acinetobacter	baumannii
GCF_001432925.1	Acinetobacter baumannii	Acinetobacter	469	Acinetobacter baumannii	470	Acinetobacter	baumannii
GCF_001612115.1	Acinetobacter baumannii	Acinetobacter	469	Acinetobacter baumannii	470	Acinetobacter	baumannii
GCF_000453325.1	Acinetobacter baumannii	Acinetobacter	469	Acinetobacter baumannii	470	Acinetobacter	baumannii
GCF_000671515.1	Acinetobacter baumannii	Acinetobacter	469	Acinetobacter baumannii	470	Acinetobacter	baumannii
GCF_001441415.1	Acinetobacter baumannii	Acinetobacter	469	Acinetobacter baumannii	470	Acinetobacter	baumannii
GCF_001026965.1	Acinetobacter baumannii	Acinetobacter	469	Acinetobacter baumannii	470	Acinetobacter	baumannii
GCF_001415615.1	Acinetobacter baumannii	Acinetobacter	469	Acinetobacter baumannii	470	Acinetobacter	baumannii
GCF_000592215.1	Acinetobacter baumannii	Acinetobacter	469	Acinetobacter baumannii	470	Acinetobacter	baumannii
GCF_000804875.1	Acinetobacter baumannii	Acinetobacter	469	Acinetobacter baumannii	470	Acinetobacter	baumannii
GCF_000611405.1	Acinetobacter baumannii	Acinetobacter	469	Acinetobacter baumannii	470	Acinetobacter	baumannii
GCF_001415465.1	Acinetobacter baumannii	Acinetobacter	469	Acinetobacter baumannii	470	Acinetobacter	baumannii
GCF_001415715.1	Acinetobacter baumannii	Acinetobacter	469	Acinetobacter baumannii	470	Acinetobacter	baumannii
GCF_000811245.3	Acinetobacter baumannii	Acinetobacter	469	Acinetobacter baumannii	470	Acinetobacter	baumannii
GCF_000787355.1	Acinetobacter baumannii	Acinetobacter	469	Acinetobacter baumannii	470	Acinetobacter	baumannii
GCF_000580255.1	Acinetobacter baumannii	Acinetobacter	469	Acinetobacter baumannii	470	Acinetobacter	baumannii
GCF_000611265.1	Acinetobacter baumannii	Acinetobacter	469	Acinetobacter baumannii	470	Acinetobacter	baumannii
GCF_000582175.1	Acinetobacter baumannii	Acinetobacter	469	Acinetobacter baumannii	470	Acinetobacter	baumannii
GCF_000627335.1	Acinetobacter baumannii	Acinetobacter	469	Acinetobacter baumannii	470	Acinetobacter	baumannii
GCF_000775855.1	Acinetobacter baumannii	Acinetobacter	469	Acinetobacter baumannii	470	Acinetobacter	baumannii
GCF_000809605.3	Acinetobacter baumannii	Acinetobacter	469	Acinetobacter baumannii	470	Acinetobacter	baumannii
GCF_001416465.1	Acinetobacter baumannii	Acinetobacter	469	Acinetobacter baumannii	470	Acinetobacter	baumannii
GCF_000811405.3	Acinetobacter baumannii	Acinetobacter	469	Acinetobacter baumannii	470	Acinetobacter	baumannii
GCF_000681755.1	Acinetobacter baumannii	Acinetobacter	469	Acinetobacter baumannii	470	Acinetobacter	baumannii
GCF_000369365.1	Acinetobacter baumannii	Acinetobacter	469	Acinetobacter baumannii	470	Acinetobacter	baumannii
GCF_000592475.1	Acinetobacter baumannii	Acinetobacter	469	Acinetobacter baumannii	470	Acinetobacter	baumannii
GCF_001416005.1	Acinetobacter baumannii	Acinetobacter	469	Acinetobacter baumannii	470	Acinetobacter	baumannii
GCF_001415985.1	Acinetobacter baumannii	Acinetobacter	469	Acinetobacter baumannii	470	Acinetobacter	baumannii
GCF_000723045.1	Acinetobacter baumannii	Acinetobacter	469	Acinetobacter baumannii	470	Acinetobacter	baumannii
GCF_001612185.1	Acinetobacter baumannii	Acinetobacter	469	Acinetobacter baumannii	470	Acinetobacter	baumannii
GCF_000453505.1	Acinetobacter baumannii	Acinetobacter	469	Acinetobacter baumannii	470	Acinetobacter	baumannii
GCF_000805065.1	Acinetobacter baumannii	Acinetobacter	469	Acinetobacter baumannii	470	Acinetobacter	baumannii
GCF_001593425.1	Acinetobacter baumannii	Acinetobacter	469	Acinetobacter baumannii	470	Acinetobacter	baumannii
GCF_001433005.1	Acinetobacter baumannii	Acinetobacter	469	Acinetobacter baumannii	470	Acinetobacter	baumannii
GCF_000177715.1	Acinetobacter baumannii	Acinetobacter	469	Acinetobacter baumannii	470	Acinetobacter	baumannii
GCF_000583415.1	Acinetobacter baumannii	Acinetobacter	469	Acinetobacter baumannii	470	Acinetobacter	baumannii
GCF_000611465.1	Acinetobacter baumannii	Acinetobacter	469	Acinetobacter baumannii	470	Acinetobacter	baumannii
GCF_000581335.1	Acinetobacter baumannii	Acinetobacter	469	Acinetobacter baumannii	470	Acinetobacter	baumannii
GCF_000582155.1	Acinetobacter baumannii	Acinetobacter	469	Acinetobacter baumannii	470	Acinetobacter	baumannii
GCF_001612275.1	Acinetobacter baumannii	Acinetobacter	469	Acinetobacter baumannii	470	Acinetobacter	baumannii
GCF_000584875.1	Acinetobacter baumannii	Acinetobacter	469	Acinetobacter baumannii	470	Acinetobacter	baumannii
GCF_000588755.1	Acinetobacter baumannii	Acinetobacter	469	Acinetobacter baumannii	470	Acinetobacter	baumannii
GCF_000591815.1	Acinetobacter baumannii	Acinetobacter	469	Acinetobacter baumannii	470	Acinetobacter	baumannii
GCF_000600755.1	Acinetobacter baumannii	Acinetobacter	469	Acinetobacter baumannii	470	Acinetobacter	baumannii
GCF_001414765.1	Acinetobacter baumannii	Acinetobacter	469	Acinetobacter baumannii	470	Acinetobacter	baumannii
GCF_001414925.1	Acinetobacter baumannii	Acinetobacter	469	Acinetobacter baumannii	470	Acinetobacter	baumannii
GCF_000314655.1	Acinetobacter baumannii	Acinetobacter	469	Acinetobacter baumannii	470	Acinetobacter	baumannii
GCF_000671475.1	Acinetobacter baumannii	Acinetobacter	469	Acinetobacter baumannii	470	Acinetobacter	baumannii
GCF_000587875.1	Acinetobacter baumannii	Acinetobacter	469	Acinetobacter baumannii	470	Acinetobacter	baumannii
GCF_000588475.1	Acinetobacter baumannii	Acinetobacter	469	Acinetobacter baumannii	470	Acinetobacter	baumannii
GCF_000214985.1	Acinetobacter baumannii	Acinetobacter	469	Acinetobacter baumannii	470	Acinetobacter	baumannii
GCF_000589555.1	Acinetobacter baumannii	Acinetobacter	469	Acinetobacter baumannii	470	Acinetobacter	baumannii
GCF_001433355.1	Acinetobacter baumannii	Acinetobacter	469	Acinetobacter baumannii	470	Acinetobacter	baumannii
GCF_000516095.1	Acinetobacter baumannii	Acinetobacter	469	Acinetobacter baumannii	470	Acinetobacter	baumannii
GCF_000811225.3	Acinetobacter baumannii	Acinetobacter	469	Acinetobacter baumannii	470	Acinetobacter	baumannii
GCF_000671555.1	Acinetobacter baumannii	Acinetobacter	469	Acinetobacter baumannii	470	Acinetobacter	baumannii
GCF_000580135.1	Acinetobacter baumannii	Acinetobacter	469	Acinetobacter baumannii	470	Acinetobacter	baumannii
GCF_000581575.1	Acinetobacter baumannii	Acinetobacter	469	Acinetobacter baumannii	470	Acinetobacter	baumannii
GCF_000301175.1	Acinetobacter baumannii	Acinetobacter	469	Acinetobacter baumannii	470	Acinetobacter	baumannii
GCF_000809885.2	Acinetobacter baumannii	Acinetobacter	469	Acinetobacter baumannii	470	Acinetobacter	baumannii
GCF_000301495.1	Acinetobacter baumannii	Acinetobacter	469	Acinetobacter baumannii	470	Acinetobacter	baumannii
GCF_000810645.3	Acinetobacter baumannii	Acinetobacter	469	Acinetobacter baumannii	470	Acinetobacter	baumannii
GCF_000805205.1	Acinetobacter baumannii	Acinetobacter	469	Acinetobacter baumannii	470	Acinetobacter	baumannii
GCF_000805055.1	Acinetobacter baumannii	Acinetobacter	469	Acinetobacter baumannii	470	Acinetobacter	baumannii
GCF_000802915.1	Acinetobacter baumannii	Acinetobacter	469	Acinetobacter baumannii	470	Acinetobacter	baumannii
GCF_000515855.1	Acinetobacter baumannii	Acinetobacter	469	Acinetobacter baumannii	470	Acinetobacter	baumannii
GCF_000951165.1	Acinetobacter baumannii	Acinetobacter	469	Acinetobacter baumannii	470	Acinetobacter	baumannii
GCF_000682495.1	Acinetobacter baumannii	Acinetobacter	469	Acinetobacter baumannii	470	Acinetobacter	baumannii
GCF_000591955.1	Acinetobacter baumannii	Acinetobacter	469	Acinetobacter baumannii	470	Acinetobacter	baumannii
GCF_000588815.1	Acinetobacter baumannii	Acinetobacter	469	Acinetobacter baumannii	470	Acinetobacter	baumannii
GCF_000804645.1	Acinetobacter baumannii	Acinetobacter	469	Acinetobacter baumannii	470	Acinetobacter	baumannii
GCF_000810345.3	Acinetobacter baumannii	Acinetobacter	469	Acinetobacter baumannii	470	Acinetobacter	baumannii
GCF_001415505.1	Acinetobacter baumannii	Acinetobacter	469	Acinetobacter baumannii	470	Acinetobacter	baumannii
GCF_001441405.1	Acinetobacter baumannii	Acinetobacter	469	Acinetobacter baumannii	470	Acinetobacter	baumannii
GCF_001541525.1	Acinetobacter baumannii	Acinetobacter	469	Acinetobacter baumannii	470	Acinetobacter	baumannii
GCF_001415425.1	Acinetobacter baumannii	Acinetobacter	469	Acinetobacter baumannii	470	Acinetobacter	baumannii
GCF_000515775.1	Acinetobacter baumannii	Acinetobacter	469	Acinetobacter baumannii	470	Acinetobacter	baumannii
GCF_001416095.1	Acinetobacter baumannii	Acinetobacter	469	Acinetobacter baumannii	470	Acinetobacter	baumannii
GCF_000939395.1	Acinetobacter baumannii	Acinetobacter	469	Acinetobacter baumannii	470	Acinetobacter	baumannii
GCF_001415325.1	Acinetobacter baumannii	Acinetobacter	469	Acinetobacter baumannii	470	Acinetobacter	baumannii
GCF_000809345.3	Acinetobacter baumannii	Acinetobacter	469	Acinetobacter baumannii	470	Acinetobacter	baumannii
GCF_000301855.1	Acinetobacter baumannii	Acinetobacter	469	Acinetobacter baumannii	470	Acinetobacter	baumannii
GCF_000681695.1	Acinetobacter baumannii	Acinetobacter	469	Acinetobacter baumannii	470	Acinetobacter	baumannii
GCF_001007705.1	Acinetobacter baumannii	Acinetobacter	469	Acinetobacter baumannii	470	Acinetobacter	baumannii
GCF_000581535.1	Acinetobacter baumannii	Acinetobacter	469	Acinetobacter baumannii	470	Acinetobacter	baumannii
GCF_000589815.1	Acinetobacter baumannii	Acinetobacter	469	Acinetobacter baumannii	470	Acinetobacter	baumannii
GCF_000611365.1	Acinetobacter baumannii	Acinetobacter	469	Acinetobacter baumannii	470	Acinetobacter	baumannii
GCF_000589095.1	Acinetobacter baumannii	Acinetobacter	469	Acinetobacter baumannii	470	Acinetobacter	baumannii
GCF_000805545.1	Acinetobacter baumannii	Acinetobacter	469	Acinetobacter baumannii	470	Acinetobacter	baumannii
GCF_000582355.1	Acinetobacter baumannii	Acinetobacter	469	Acinetobacter baumannii	470	Acinetobacter	baumannii
GCF_000811505.3	Acinetobacter baumannii	Acinetobacter	469	Acinetobacter baumannii	470	Acinetobacter	baumannii
GCF_000592695.1	Acinetobacter baumannii	Acinetobacter	469	Acinetobacter baumannii	470	Acinetobacter	baumannii
GCF_000301215.1	Acinetobacter baumannii	Acinetobacter	469	Acinetobacter baumannii	470	Acinetobacter	baumannii
GCF_000586635.1	Acinetobacter baumannii	Acinetobacter	469	Acinetobacter baumannii	470	Acinetobacter	baumannii
GCF_000333715.1	Acinetobacter baumannii	Acinetobacter	469	Acinetobacter baumannii	470	Acinetobacter	baumannii
GCF_001432585.1	Acinetobacter baumannii	Acinetobacter	469	Acinetobacter baumannii	470	Acinetobacter	baumannii
GCF_000516195.2	Acinetobacter baumannii	Acinetobacter	469	Acinetobacter baumannii	470	Acinetobacter	baumannii
GCF_000627655.1	Acinetobacter baumannii	Acinetobacter	469	Acinetobacter baumannii	470	Acinetobacter	baumannii
GCF_000580695.1	Acinetobacter baumannii	Acinetobacter	469	Acinetobacter baumannii	470	Acinetobacter	baumannii
GCF_000301355.1	Acinetobacter baumannii	Acinetobacter	469	Acinetobacter baumannii	470	Acinetobacter	baumannii
GCF_000588075.1	Acinetobacter baumannii	Acinetobacter	469	Acinetobacter baumannii	470	Acinetobacter	baumannii
GCF_001612395.1	Acinetobacter baumannii	Acinetobacter	469	Acinetobacter baumannii	470	Acinetobacter	baumannii
GCF_001512135.1	Acinetobacter baumannii	Acinetobacter	469	Acinetobacter baumannii	470	Acinetobacter	baumannii
GCF_001053695.1	Acinetobacter baumannii	Acinetobacter	469	Acinetobacter baumannii	470	Acinetobacter	baumannii
GCF_000811305.3	Acinetobacter baumannii	Acinetobacter	469	Acinetobacter baumannii	470	Acinetobacter	baumannii
GCF_001008125.1	Acinetobacter baumannii	Acinetobacter	469	Acinetobacter baumannii	470	Acinetobacter	baumannii
GCF_000589535.1	Acinetobacter baumannii	Acinetobacter	469	Acinetobacter baumannii	470	Acinetobacter	baumannii
GCF_000627715.1	Acinetobacter baumannii	Acinetobacter	469	Acinetobacter baumannii	470	Acinetobacter	baumannii
GCF_000600775.1	Acinetobacter baumannii	Acinetobacter	469	Acinetobacter baumannii	470	Acinetobacter	baumannii
GCF_000611505.1	Acinetobacter baumannii	Acinetobacter	469	Acinetobacter baumannii	470	Acinetobacter	baumannii
GCF_000516175.1	Acinetobacter baumannii	Acinetobacter	469	Acinetobacter baumannii	470	Acinetobacter	baumannii
GCF_000302095.1	Acinetobacter baumannii	Acinetobacter	469	Acinetobacter baumannii	470	Acinetobacter	baumannii
GCF_000583495.1	Acinetobacter baumannii	Acinetobacter	469	Acinetobacter baumannii	470	Acinetobacter	baumannii
GCF_000589675.1	Acinetobacter baumannii	Acinetobacter	469	Acinetobacter baumannii	470	Acinetobacter	baumannii
GCF_001053755.1	Acinetobacter baumannii	Acinetobacter	469	Acinetobacter baumannii	470	Acinetobacter	baumannii
GCF_000708795.1	Acinetobacter baumannii	Acinetobacter	469	Acinetobacter baumannii	470	Acinetobacter	baumannii
GCF_000581595.1	Acinetobacter baumannii	Acinetobacter	469	Acinetobacter baumannii	470	Acinetobacter	baumannii
GCF_000681915.1	Acinetobacter baumannii	Acinetobacter	469	Acinetobacter baumannii	470	Acinetobacter	baumannii
GCF_000584555.1	Acinetobacter baumannii	Acinetobacter	469	Acinetobacter baumannii	470	Acinetobacter	baumannii
GCF_000809825.3	Acinetobacter baumannii	Acinetobacter	469	Acinetobacter baumannii	470	Acinetobacter	baumannii
GCF_000581075.1	Acinetobacter baumannii	Acinetobacter	469	Acinetobacter baumannii	470	Acinetobacter	baumannii
GCF_000583315.1	Acinetobacter baumannii	Acinetobacter	469	Acinetobacter baumannii	470	Acinetobacter	baumannii
GCF_000750855.1	Acinetobacter baumannii	Acinetobacter	469	Acinetobacter baumannii	470	Acinetobacter	baumannii
GCF_000809365.3	Acinetobacter baumannii	Acinetobacter	469	Acinetobacter baumannii	470	Acinetobacter	baumannii
GCF_001416155.1	Acinetobacter baumannii	Acinetobacter	469	Acinetobacter baumannii	470	Acinetobacter	baumannii
GCF_000600855.1	Acinetobacter baumannii	Acinetobacter	469	Acinetobacter baumannii	470	Acinetobacter	baumannii
GCF_000580155.1	Acinetobacter baumannii	Acinetobacter	469	Acinetobacter baumannii	470	Acinetobacter	baumannii
GCF_000592055.1	Acinetobacter baumannii	Acinetobacter	469	Acinetobacter baumannii	470	Acinetobacter	baumannii
GCF_000811885.3	Acinetobacter baumannii	Acinetobacter	469	Acinetobacter baumannii	470	Acinetobacter	baumannii
GCF_001433205.1	Acinetobacter baumannii	Acinetobacter	469	Acinetobacter baumannii	470	Acinetobacter	baumannii
GCF_000453305.1	Acinetobacter baumannii	Acinetobacter	469	Acinetobacter baumannii	470	Acinetobacter	baumannii
GCF_000576535.1	Acinetobacter baumannii	Acinetobacter	469	Acinetobacter baumannii	470	Acinetobacter	baumannii
GCF_000453365.1	Acinetobacter baumannii	Acinetobacter	469	Acinetobacter baumannii	470	Acinetobacter	baumannii
GCF_001433675.1	Acinetobacter baumannii	Acinetobacter	469	Acinetobacter baumannii	470	Acinetobacter	baumannii
GCF_000516215.2	Acinetobacter baumannii	Acinetobacter	469	Acinetobacter baumannii	470	Acinetobacter	baumannii
GCF_001511855.1	Acinetobacter baumannii	Acinetobacter	469	Acinetobacter baumannii	470	Acinetobacter	baumannii
GCF_000301415.1	Acinetobacter baumannii	Acinetobacter	469	Acinetobacter baumannii	470	Acinetobacter	baumannii
GCF_000808785.3	Acinetobacter baumannii	Acinetobacter	469	Acinetobacter baumannii	470	Acinetobacter	baumannii
GCF_000588315.1	Acinetobacter baumannii	Acinetobacter	469	Acinetobacter baumannii	470	Acinetobacter	baumannii
GCF_001417485.1	Acinetobacter baumannii	Acinetobacter	469	Acinetobacter baumannii	470	Acinetobacter	baumannii
GCF_000627675.1	Acinetobacter baumannii	Acinetobacter	469	Acinetobacter baumannii	470	Acinetobacter	baumannii
GCF_000583575.1	Acinetobacter baumannii	Acinetobacter	469	Acinetobacter baumannii	470	Acinetobacter	baumannii
GCF_000516595.2	Acinetobacter baumannii	Acinetobacter	469	Acinetobacter baumannii	470	Acinetobacter	baumannii
GCF_000307895.1	Acinetobacter baumannii	Acinetobacter	469	Acinetobacter baumannii	470	Acinetobacter	baumannii
GCF_000809235.3	Acinetobacter baumannii	Acinetobacter	469	Acinetobacter baumannii	470	Acinetobacter	baumannii
GCF_000353855.1	Acinetobacter baumannii	Acinetobacter	469	Acinetobacter baumannii	470	Acinetobacter	baumannii
GCF_000939565.1	Acinetobacter baumannii	Acinetobacter	469	Acinetobacter baumannii	470	Acinetobacter	baumannii
GCF_001432685.1	Acinetobacter baumannii	Acinetobacter	469	Acinetobacter baumannii	470	Acinetobacter	baumannii
GCF_000581415.1	Acinetobacter baumannii	Acinetobacter	469	Acinetobacter baumannii	470	Acinetobacter	baumannii
GCF_001416395.1	Acinetobacter baumannii	Acinetobacter	469	Acinetobacter baumannii	470	Acinetobacter	baumannii
GCF_000581855.1	Acinetobacter baumannii	Acinetobacter	469	Acinetobacter baumannii	470	Acinetobacter	baumannii
GCF_001416255.1	Acinetobacter baumannii	Acinetobacter	469	Acinetobacter baumannii	470	Acinetobacter	baumannii
GCF_000589195.1	Acinetobacter baumannii	Acinetobacter	469	Acinetobacter baumannii	470	Acinetobacter	baumannii
GCF_000809215.3	Acinetobacter baumannii	Acinetobacter	469	Acinetobacter baumannii	470	Acinetobacter	baumannii
GCF_000810685.3	Acinetobacter baumannii	Acinetobacter	469	Acinetobacter baumannii	470	Acinetobacter	baumannii
GCF_000589375.1	Acinetobacter baumannii	Acinetobacter	469	Acinetobacter baumannii	470	Acinetobacter	baumannii
GCF_000583235.1	Acinetobacter baumannii	Acinetobacter	469	Acinetobacter baumannii	470	Acinetobacter	baumannii
GCF_001055965.1	Acinetobacter baumannii	Acinetobacter	469	Acinetobacter baumannii	470	Acinetobacter	baumannii
GCF_000301655.1	Acinetobacter baumannii	Acinetobacter	469	Acinetobacter baumannii	470	Acinetobacter	baumannii
GCF_000369385.1	Acinetobacter baumannii	Acinetobacter	469	Acinetobacter baumannii	470	Acinetobacter	baumannii
GCF_001512115.1	Acinetobacter baumannii	Acinetobacter	469	Acinetobacter baumannii	470	Acinetobacter	baumannii
GCF_000809665.3	Acinetobacter baumannii	Acinetobacter	469	Acinetobacter baumannii	470	Acinetobacter	baumannii
GCF_000969285.1	Acinetobacter baumannii	Acinetobacter	469	Acinetobacter baumannii	470	Acinetobacter	baumannii
GCF_000804965.1	Acinetobacter baumannii	Acinetobacter	469	Acinetobacter baumannii	470	Acinetobacter	baumannii
GCF_000810825.3	Acinetobacter baumannii	Acinetobacter	469	Acinetobacter baumannii	470	Acinetobacter	baumannii
GCF_000811185.3	Acinetobacter baumannii	Acinetobacter	469	Acinetobacter baumannii	470	Acinetobacter	baumannii
GCF_000581935.1	Acinetobacter baumannii	Acinetobacter	469	Acinetobacter baumannii	470	Acinetobacter	baumannii
GCF_000682275.1	Acinetobacter baumannii	Acinetobacter	469	Acinetobacter baumannii	470	Acinetobacter	baumannii
GCF_000308995.1	Acinetobacter baumannii	Acinetobacter	469	Acinetobacter baumannii	470	Acinetobacter	baumannii
GCF_000589715.1	Acinetobacter baumannii	Acinetobacter	469	Acinetobacter baumannii	470	Acinetobacter	baumannii
GCF_000600895.1	Acinetobacter baumannii	Acinetobacter	469	Acinetobacter baumannii	470	Acinetobacter	baumannii
GCF_000509345.1	Acinetobacter baumannii	Acinetobacter	469	Acinetobacter baumannii	470	Acinetobacter	baumannii
GCF_000583275.1	Acinetobacter baumannii	Acinetobacter	469	Acinetobacter baumannii	470	Acinetobacter	baumannii
GCF_000309255.1	Acinetobacter baumannii	Acinetobacter	469	Acinetobacter baumannii	470	Acinetobacter	baumannii
GCF_000591915.1	Acinetobacter baumannii	Acinetobacter	469	Acinetobacter baumannii	470	Acinetobacter	baumannii
GCF_000805535.1	Acinetobacter baumannii	Acinetobacter	469	Acinetobacter baumannii	470	Acinetobacter	baumannii
GCF_000876075.1	Acinetobacter baumannii	Acinetobacter	469	Acinetobacter baumannii	470	Acinetobacter	baumannii
GCF_000811105.3	Acinetobacter baumannii	Acinetobacter	469	Acinetobacter baumannii	470	Acinetobacter	baumannii
GCF_000354095.1	Acinetobacter baumannii	Acinetobacter	469	Acinetobacter baumannii	470	Acinetobacter	baumannii
GCF_000515615.1	Acinetobacter baumannii	Acinetobacter	469	Acinetobacter baumannii	470	Acinetobacter	baumannii
GCF_000811625.3	Acinetobacter baumannii	Acinetobacter	469	Acinetobacter baumannii	470	Acinetobacter	baumannii
GCF_000453245.1	Acinetobacter baumannii	Acinetobacter	469	Acinetobacter baumannii	470	Acinetobacter	baumannii
GCF_000809485.3	Acinetobacter baumannii	Acinetobacter	469	Acinetobacter baumannii	470	Acinetobacter	baumannii
GCF_001416515.1	Acinetobacter baumannii	Acinetobacter	469	Acinetobacter baumannii	470	Acinetobacter	baumannii
GCF_000581775.1	Acinetobacter baumannii	Acinetobacter	469	Acinetobacter baumannii	470	Acinetobacter	baumannii
GCF_000583595.1	Acinetobacter baumannii	Acinetobacter	469	Acinetobacter baumannii	470	Acinetobacter	baumannii
GCF_000681795.1	Acinetobacter baumannii	Acinetobacter	469	Acinetobacter baumannii	470	Acinetobacter	baumannii
GCF_000589055.1	Acinetobacter baumannii	Acinetobacter	469	Acinetobacter baumannii	470	Acinetobacter	baumannii
GCF_000611325.1	Acinetobacter baumannii	Acinetobacter	469	Acinetobacter baumannii	470	Acinetobacter	baumannii
GCF_000830055.1	Acinetobacter baumannii	Acinetobacter	469	Acinetobacter baumannii	470	Acinetobacter	baumannii
GCF_001415805.1	Acinetobacter baumannii	Acinetobacter	469	Acinetobacter baumannii	470	Acinetobacter	baumannii
GCF_000682115.1	Acinetobacter baumannii	Acinetobacter	469	Acinetobacter baumannii	470	Acinetobacter	baumannii
GCF_000453125.1	Acinetobacter baumannii	Acinetobacter	469	Acinetobacter baumannii	470	Acinetobacter	baumannii
GCF_001027885.1	Acinetobacter baumannii	Acinetobacter	469	Acinetobacter baumannii	470	Acinetobacter	baumannii
GCF_001420505.1	Acinetobacter baumannii	Acinetobacter	469	Acinetobacter baumannii	470	Acinetobacter	baumannii
GCF_000588055.1	Acinetobacter baumannii	Acinetobacter	469	Acinetobacter baumannii	470	Acinetobacter	baumannii
GCF_000453685.1	Acinetobacter baumannii	Acinetobacter	469	Acinetobacter baumannii	470	Acinetobacter	baumannii
GCF_000804725.1	Acinetobacter baumannii	Acinetobacter	469	Acinetobacter baumannii	470	Acinetobacter	baumannii
GCF_000189695.1	Acinetobacter baumannii	Acinetobacter	469	Acinetobacter baumannii	470	Acinetobacter	baumannii
GCF_000592135.1	Acinetobacter baumannii	Acinetobacter	469	Acinetobacter baumannii	470	Acinetobacter	baumannii
GCF_000583295.1	Acinetobacter baumannii	Acinetobacter	469	Acinetobacter baumannii	470	Acinetobacter	baumannii
GCF_000367885.1	Acinetobacter baumannii	Acinetobacter	469	Acinetobacter baumannii	470	Acinetobacter	baumannii
GCF_000589775.1	Acinetobacter baumannii	Acinetobacter	469	Acinetobacter baumannii	470	Acinetobacter	baumannii
GCF_000354055.1	Acinetobacter baumannii	Acinetobacter	469	Acinetobacter baumannii	470	Acinetobacter	baumannii
GCF_001415255.1	Acinetobacter baumannii	Acinetobacter	469	Acinetobacter baumannii	470	Acinetobacter	baumannii
GCF_000811905.3	Acinetobacter baumannii	Acinetobacter	469	Acinetobacter baumannii	470	Acinetobacter	baumannii
GCF_000708775.1	Acinetobacter baumannii	Acinetobacter	469	Acinetobacter baumannii	470	Acinetobacter	baumannii
GCF_000682415.1	Acinetobacter baumannii	Acinetobacter	469	Acinetobacter baumannii	470	Acinetobacter	baumannii
GCF_000810835.3	Acinetobacter baumannii	Acinetobacter	469	Acinetobacter baumannii	470	Acinetobacter	baumannii
GCF_000581055.1	Acinetobacter baumannii	Acinetobacter	469	Acinetobacter baumannii	470	Acinetobacter	baumannii
GCF_000453145.1	Acinetobacter baumannii	Acinetobacter	469	Acinetobacter baumannii	470	Acinetobacter	baumannii
GCF_001414905.1	Acinetobacter baumannii	Acinetobacter	469	Acinetobacter baumannii	470	Acinetobacter	baumannii
GCF_000453605.1	Acinetobacter baumannii	Acinetobacter	469	Acinetobacter baumannii	470	Acinetobacter	baumannii
GCF_000787335.1	Acinetobacter baumannii	Acinetobacter	469	Acinetobacter baumannii	470	Acinetobacter	baumannii
GCF_000584655.1	Acinetobacter baumannii	Acinetobacter	469	Acinetobacter baumannii	470	Acinetobacter	baumannii
GCF_000369325.1	Acinetobacter baumannii	Acinetobacter	469	Acinetobacter baumannii	470	Acinetobacter	baumannii
GCF_001077575.1	Acinetobacter baumannii	Acinetobacter	469	Acinetobacter baumannii	470	Acinetobacter	baumannii
GCF_000588035.1	Acinetobacter baumannii	Acinetobacter	469	Acinetobacter baumannii	470	Acinetobacter	baumannii
GCF_000811085.3	Acinetobacter baumannii	Acinetobacter	469	Acinetobacter baumannii	470	Acinetobacter	baumannii
GCF_000682075.1	Acinetobacter baumannii	Acinetobacter	469	Acinetobacter baumannii	470	Acinetobacter	baumannii
GCF_000021245.1	Acinetobacter baumannii	Acinetobacter	469	Acinetobacter baumannii	470	Acinetobacter	baumannii
GCF_001612015.1	Acinetobacter baumannii	Acinetobacter	469	Acinetobacter baumannii	470	Acinetobacter	baumannii
GCF_000600535.1	Acinetobacter baumannii	Acinetobacter	469	Acinetobacter baumannii	470	Acinetobacter	baumannii
GCF_000820665.1	Acinetobacter baumannii	Acinetobacter	469	Acinetobacter baumannii	470	Acinetobacter	baumannii
GCF_000589575.1	Acinetobacter baumannii	Acinetobacter	469	Acinetobacter baumannii	470	Acinetobacter	baumannii
GCF_001028305.1	Acinetobacter baumannii	Acinetobacter	469	Acinetobacter baumannii	470	Acinetobacter	baumannii
GCF_000627415.1	Acinetobacter baumannii	Acinetobacter	469	Acinetobacter baumannii	470	Acinetobacter	baumannii
GCF_001433055.1	Acinetobacter baumannii	Acinetobacter	469	Acinetobacter baumannii	470	Acinetobacter	baumannii
GCF_001432425.1	Acinetobacter baumannii	Acinetobacter	469	Acinetobacter baumannii	470	Acinetobacter	baumannii
GCF_000787225.1	Acinetobacter baumannii	Acinetobacter	469	Acinetobacter baumannii	470	Acinetobacter	baumannii
GCF_000515535.1	Acinetobacter baumannii	Acinetobacter	469	Acinetobacter baumannii	470	Acinetobacter	baumannii
GCF_000453405.1	Acinetobacter baumannii	Acinetobacter	469	Acinetobacter baumannii	470	Acinetobacter	baumannii
GCF_000600655.1	Acinetobacter baumannii	Acinetobacter	469	Acinetobacter baumannii	470	Acinetobacter	baumannii
GCF_000589615.1	Acinetobacter baumannii	Acinetobacter	469	Acinetobacter baumannii	470	Acinetobacter	baumannii
GCF_000588635.1	Acinetobacter baumannii	Acinetobacter	469	Acinetobacter baumannii	470	Acinetobacter	baumannii
GCF_000589735.1	Acinetobacter baumannii	Acinetobacter	469	Acinetobacter baumannii	470	Acinetobacter	baumannii
GCF_000453625.1	Acinetobacter baumannii	Acinetobacter	469	Acinetobacter baumannii	470	Acinetobacter	baumannii
GCF_000515475.1	Acinetobacter baumannii	Acinetobacter	469	Acinetobacter baumannii	470	Acinetobacter	baumannii
GCF_001432895.1	Acinetobacter baumannii	Acinetobacter	469	Acinetobacter baumannii	470	Acinetobacter	baumannii
GCF_000186665.3	Acinetobacter baumannii	Acinetobacter	469	Acinetobacter baumannii	470	Acinetobacter	baumannii
GCF_001612335.1	Acinetobacter baumannii	Acinetobacter	469	Acinetobacter baumannii	470	Acinetobacter	baumannii
GCF_000949055.2	Acinetobacter baumannii	Acinetobacter	469	Acinetobacter baumannii	470	Acinetobacter	baumannii
GCF_000588655.1	Acinetobacter baumannii	Acinetobacter	469	Acinetobacter baumannii	470	Acinetobacter	baumannii
GCF_000600635.1	Acinetobacter baumannii	Acinetobacter	469	Acinetobacter baumannii	470	Acinetobacter	baumannii
GCF_000949115.2	Acinetobacter baumannii	Acinetobacter	469	Acinetobacter baumannii	470	Acinetobacter	baumannii
GCF_000419425.1	Acinetobacter baumannii	Acinetobacter	469	Acinetobacter baumannii	470	Acinetobacter	baumannii
GCF_000682135.1	Acinetobacter baumannii	Acinetobacter	469	Acinetobacter baumannii	470	Acinetobacter	baumannii
GCF_000301235.1	Acinetobacter baumannii	Acinetobacter	469	Acinetobacter baumannii	470	Acinetobacter	baumannii
GCF_000419385.1	Acinetobacter baumannii	Acinetobacter	469	Acinetobacter baumannii	470	Acinetobacter	baumannii
GCF_000453065.1	Acinetobacter baumannii	Acinetobacter	469	Acinetobacter baumannii	470	Acinetobacter	baumannii
GCF_000811145.3	Acinetobacter baumannii	Acinetobacter	469	Acinetobacter baumannii	470	Acinetobacter	baumannii
GCF_001415355.1	Acinetobacter baumannii	Acinetobacter	469	Acinetobacter baumannii	470	Acinetobacter	baumannii
GCF_000301895.1	Acinetobacter baumannii	Acinetobacter	469	Acinetobacter baumannii	470	Acinetobacter	baumannii
GCF_001416495.1	Acinetobacter baumannii	Acinetobacter	469	Acinetobacter baumannii	470	Acinetobacter	baumannii
GCF_000582295.1	Acinetobacter baumannii	Acinetobacter	469	Acinetobacter baumannii	470	Acinetobacter	baumannii
GCF_000309275.1	Acinetobacter baumannii	Acinetobacter	469	Acinetobacter baumannii	470	Acinetobacter	baumannii
GCF_000580235.1	Acinetobacter baumannii	Acinetobacter	469	Acinetobacter baumannii	470	Acinetobacter	baumannii
GCF_001052325.1	Acinetobacter baumannii	Acinetobacter	469	Acinetobacter baumannii	470	Acinetobacter	baumannii
GCF_001400975.1	Acinetobacter baumannii	Acinetobacter	469	Acinetobacter baumannii	470	Acinetobacter	baumannii
GCF_000453545.1	Acinetobacter baumannii	Acinetobacter	469	Acinetobacter baumannii	470	Acinetobacter	baumannii
GCF_000588995.1	Acinetobacter baumannii	Acinetobacter	469	Acinetobacter baumannii	470	Acinetobacter	baumannii
GCF_000810125.3	Acinetobacter baumannii	Acinetobacter	469	Acinetobacter baumannii	470	Acinetobacter	baumannii
GCF_000453725.1	Acinetobacter baumannii	Acinetobacter	469	Acinetobacter baumannii	470	Acinetobacter	baumannii
GCF_000453105.1	Acinetobacter baumannii	Acinetobacter	469	Acinetobacter baumannii	470	Acinetobacter	baumannii
GCF_000173395.1	Acinetobacter baumannii	Acinetobacter	469	Acinetobacter baumannii	470	Acinetobacter	baumannii
GCF_000592315.1	Acinetobacter baumannii	Acinetobacter	469	Acinetobacter baumannii	470	Acinetobacter	baumannii
GCF_000516075.1	Acinetobacter baumannii	Acinetobacter	469	Acinetobacter baumannii	470	Acinetobacter	baumannii
GCF_001432975.1	Acinetobacter baumannii	Acinetobacter	469	Acinetobacter baumannii	470	Acinetobacter	baumannii
GCF_000453965.1	Acinetobacter baumannii	Acinetobacter	469	Acinetobacter baumannii	470	Acinetobacter	baumannii
GCF_000301395.1	Acinetobacter baumannii	Acinetobacter	469	Acinetobacter baumannii	470	Acinetobacter	baumannii
GCF_000417785.2	Acinetobacter baumannii	Acinetobacter	469	Acinetobacter baumannii	470	Acinetobacter	baumannii
GCF_000804635.1	Acinetobacter baumannii	Acinetobacter	469	Acinetobacter baumannii	470	Acinetobacter	baumannii
GCF_001415345.1	Acinetobacter baumannii	Acinetobacter	469	Acinetobacter baumannii	470	Acinetobacter	baumannii
GCF_001417495.1	Acinetobacter baumannii	Acinetobacter	469	Acinetobacter baumannii	470	Acinetobacter	baumannii
GCF_000949165.2	Acinetobacter baumannii	Acinetobacter	469	Acinetobacter baumannii	470	Acinetobacter	baumannii
GCF_000969365.1	Acinetobacter baumannii	Acinetobacter	469	Acinetobacter baumannii	470	Acinetobacter	baumannii
GCF_000515435.1	Acinetobacter baumannii	Acinetobacter	469	Acinetobacter baumannii	470	Acinetobacter	baumannii
GCF_000600735.1	Acinetobacter baumannii	Acinetobacter	469	Acinetobacter baumannii	470	Acinetobacter	baumannii
GCF_000681595.1	Acinetobacter baumannii	Acinetobacter	469	Acinetobacter baumannii	470	Acinetobacter	baumannii
GCF_000278645.1	Acinetobacter baumannii	Acinetobacter	469	Acinetobacter baumannii	470	Acinetobacter	baumannii
GCF_001541425.1	Acinetobacter baumannii	Acinetobacter	469	Acinetobacter baumannii	470	Acinetobacter	baumannii
GCF_000301555.1	Acinetobacter baumannii	Acinetobacter	469	Acinetobacter baumannii	470	Acinetobacter	baumannii
GCF_001416545.1	Acinetobacter baumannii	Acinetobacter	469	Acinetobacter baumannii	470	Acinetobacter	baumannii
GCF_001541455.1	Acinetobacter baumannii	Acinetobacter	469	Acinetobacter baumannii	470	Acinetobacter	baumannii
GCF_000516055.1	Acinetobacter baumannii	Acinetobacter	469	Acinetobacter baumannii	470	Acinetobacter	baumannii
GCF_000627535.1	Acinetobacter baumannii	Acinetobacter	469	Acinetobacter baumannii	470	Acinetobacter	baumannii
GCF_000584415.1	Acinetobacter baumannii	Acinetobacter	469	Acinetobacter baumannii	470	Acinetobacter	baumannii
GCF_001028315.1	Acinetobacter baumannii	Acinetobacter	469	Acinetobacter baumannii	470	Acinetobacter	baumannii
GCF_000453645.1	Acinetobacter baumannii	Acinetobacter	469	Acinetobacter baumannii	470	Acinetobacter	baumannii
GCF_000342085.1	Acinetobacter baumannii	Acinetobacter	469	Acinetobacter baumannii	470	Acinetobacter	baumannii
GCF_000682375.1	Acinetobacter baumannii	Acinetobacter	469	Acinetobacter baumannii	470	Acinetobacter	baumannii
GCF_000809425.3	Acinetobacter baumannii	Acinetobacter	469	Acinetobacter baumannii	470	Acinetobacter	baumannii
GCF_001541705.1	Acinetobacter baumannii	Acinetobacter	469	Acinetobacter baumannii	470	Acinetobacter	baumannii
GCF_001416225.1	Acinetobacter baumannii	Acinetobacter	469	Acinetobacter baumannii	470	Acinetobacter	baumannii
GCF_000301995.1	Acinetobacter baumannii	Acinetobacter	469	Acinetobacter baumannii	470	Acinetobacter	baumannii
GCF_000627595.1	Acinetobacter baumannii	Acinetobacter	469	Acinetobacter baumannii	470	Acinetobacter	baumannii
GCF_000368525.1	Acinetobacter baumannii	Acinetobacter	469	Acinetobacter baumannii	470	Acinetobacter	baumannii
GCF_001415535.1	Acinetobacter baumannii	Acinetobacter	469	Acinetobacter baumannii	470	Acinetobacter	baumannii
GCF_000671435.1	Acinetobacter baumannii	Acinetobacter	469	Acinetobacter baumannii	470	Acinetobacter	baumannii
GCF_000681995.1	Acinetobacter baumannii	Acinetobacter	469	Acinetobacter baumannii	470	Acinetobacter	baumannii
GCF_000584455.1	Acinetobacter baumannii	Acinetobacter	469	Acinetobacter baumannii	470	Acinetobacter	baumannii
GCF_000584595.1	Acinetobacter baumannii	Acinetobacter	469	Acinetobacter baumannii	470	Acinetobacter	baumannii
GCF_000809785.3	Acinetobacter baumannii	Acinetobacter	469	Acinetobacter baumannii	470	Acinetobacter	baumannii
GCF_000611445.1	Acinetobacter baumannii	Acinetobacter	469	Acinetobacter baumannii	470	Acinetobacter	baumannii
GCF_000516295.1	Acinetobacter baumannii	Acinetobacter	469	Acinetobacter baumannii	470	Acinetobacter	baumannii
GCF_001444225.1	Acinetobacter baumannii	Acinetobacter	469	Acinetobacter baumannii	470	Acinetobacter	baumannii
GCF_000453425.1	Acinetobacter baumannii	Acinetobacter	469	Acinetobacter baumannii	470	Acinetobacter	baumannii
GCF_000949195.2	Acinetobacter baumannii	Acinetobacter	469	Acinetobacter baumannii	470	Acinetobacter	baumannii
GCF_000342065.1	Acinetobacter baumannii	Acinetobacter	469	Acinetobacter baumannii	470	Acinetobacter	baumannii
GCF_000584035.1	Acinetobacter baumannii	Acinetobacter	469	Acinetobacter baumannii	470	Acinetobacter	baumannii
GCF_000453885.1	Acinetobacter baumannii	Acinetobacter	469	Acinetobacter baumannii	470	Acinetobacter	baumannii
GCF_000592615.1	Acinetobacter baumannii	Acinetobacter	469	Acinetobacter baumannii	470	Acinetobacter	baumannii
GCF_000592755.1	Acinetobacter baumannii	Acinetobacter	469	Acinetobacter baumannii	470	Acinetobacter	baumannii
GCF_000591615.1	Acinetobacter baumannii	Acinetobacter	469	Acinetobacter baumannii	470	Acinetobacter	baumannii
GCF_000509325.1	Acinetobacter baumannii	Acinetobacter	469	Acinetobacter baumannii	470	Acinetobacter	baumannii
GCF_000309095.1	Acinetobacter baumannii	Acinetobacter	469	Acinetobacter baumannii	470	Acinetobacter	baumannii
GCF_000333735.1	Acinetobacter baumannii	Acinetobacter	469	Acinetobacter baumannii	470	Acinetobacter	baumannii
GCF_000302195.1	Acinetobacter baumannii	Acinetobacter	469	Acinetobacter baumannii	470	Acinetobacter	baumannii
GCF_001442575.1	Acinetobacter baumannii	Acinetobacter	469	Acinetobacter baumannii	470	Acinetobacter	baumannii
GCF_000222225.1	Acinetobacter baumannii	Acinetobacter	469	Acinetobacter baumannii	470	Acinetobacter	baumannii
GCF_000810945.3	Acinetobacter baumannii	Acinetobacter	469	Acinetobacter baumannii	470	Acinetobacter	baumannii
GCF_000314635.1	Acinetobacter baumannii	Acinetobacter	469	Acinetobacter baumannii	470	Acinetobacter	baumannii
GCF_000581475.1	Acinetobacter baumannii	Acinetobacter	469	Acinetobacter baumannii	470	Acinetobacter	baumannii
GCF_000588775.1	Acinetobacter baumannii	Acinetobacter	469	Acinetobacter baumannii	470	Acinetobacter	baumannii
GCF_000338835.1	Acinetobacter baumannii	Acinetobacter	469	Acinetobacter baumannii	470	Acinetobacter	baumannii
GCF_000592355.1	Acinetobacter baumannii	Acinetobacter	469	Acinetobacter baumannii	470	Acinetobacter	baumannii
GCF_001292715.1	Acinetobacter baumannii	Acinetobacter	469	Acinetobacter baumannii	470	Acinetobacter	baumannii
GCF_000809285.3	Acinetobacter baumannii	Acinetobacter	469	Acinetobacter baumannii	470	Acinetobacter	baumannii
GCF_000214965.1	Acinetobacter baumannii	Acinetobacter	469	Acinetobacter baumannii	470	Acinetobacter	baumannii
GCF_000627495.1	Acinetobacter baumannii	Acinetobacter	469	Acinetobacter baumannii	470	Acinetobacter	baumannii
GCF_000600475.1	Acinetobacter baumannii	Acinetobacter	469	Acinetobacter baumannii	470	Acinetobacter	baumannii
GCF_000681775.1	Acinetobacter baumannii	Acinetobacter	469	Acinetobacter baumannii	470	Acinetobacter	baumannii
GCF_000368245.1	Acinetobacter baumannii	Acinetobacter	469	Acinetobacter baumannii	470	Acinetobacter	baumannii
GCF_001432965.1	Acinetobacter baumannii	Acinetobacter	469	Acinetobacter baumannii	470	Acinetobacter	baumannii
GCF_001007725.1	Acinetobacter baumannii	Acinetobacter	469	Acinetobacter baumannii	470	Acinetobacter	baumannii
GCF_001612155.1	Acinetobacter baumannii	Acinetobacter	469	Acinetobacter baumannii	470	Acinetobacter	baumannii
GCF_000299675.1	Acinetobacter baumannii	Acinetobacter	469	Acinetobacter baumannii	470	Acinetobacter	baumannii
GCF_000591775.1	Acinetobacter baumannii	Acinetobacter	469	Acinetobacter baumannii	470	Acinetobacter	baumannii
GCF_000581975.1	Acinetobacter baumannii	Acinetobacter	469	Acinetobacter baumannii	470	Acinetobacter	baumannii
GCF_000811685.3	Acinetobacter baumannii	Acinetobacter	469	Acinetobacter baumannii	470	Acinetobacter	baumannii
GCF_000297915.1	Acinetobacter baumannii	Acinetobacter	469	Acinetobacter baumannii	470	Acinetobacter	baumannii
GCF_001414685.1	Acinetobacter baumannii	Acinetobacter	469	Acinetobacter baumannii	470	Acinetobacter	baumannii
GCF_000417805.2	Acinetobacter baumannii	Acinetobacter	469	Acinetobacter baumannii	470	Acinetobacter	baumannii
GCF_000811605.3	Acinetobacter baumannii	Acinetobacter	469	Acinetobacter baumannii	470	Acinetobacter	baumannii
GCF_000811645.3	Acinetobacter baumannii	Acinetobacter	469	Acinetobacter baumannii	470	Acinetobacter	baumannii
GCF_001512175.1	Acinetobacter baumannii	Acinetobacter	469	Acinetobacter baumannii	470	Acinetobacter	baumannii
GCF_000580775.1	Acinetobacter baumannii	Acinetobacter	469	Acinetobacter baumannii	470	Acinetobacter	baumannii
GCF_000591715.1	Acinetobacter baumannii	Acinetobacter	469	Acinetobacter baumannii	470	Acinetobacter	baumannii
GCF_001416415.1	Acinetobacter baumannii	Acinetobacter	469	Acinetobacter baumannii	470	Acinetobacter	baumannii
GCF_000301915.1	Acinetobacter baumannii	Acinetobacter	469	Acinetobacter baumannii	470	Acinetobacter	baumannii
GCF_001612005.1	Acinetobacter baumannii	Acinetobacter	469	Acinetobacter baumannii	470	Acinetobacter	baumannii
GCF_000737145.1	Acinetobacter baumannii	Acinetobacter	469	Acinetobacter baumannii	470	Acinetobacter	baumannii
GCF_000583535.1	Acinetobacter baumannii	Acinetobacter	469	Acinetobacter baumannii	470	Acinetobacter	baumannii
GCF_000811015.3	Acinetobacter baumannii	Acinetobacter	469	Acinetobacter baumannii	470	Acinetobacter	baumannii
GCF_000453705.1	Acinetobacter baumannii	Acinetobacter	469	Acinetobacter baumannii	470	Acinetobacter	baumannii
GCF_000297575.1	Acinetobacter baumannii	Acinetobacter	469	Acinetobacter baumannii	470	Acinetobacter	baumannii
GCF_001052775.1	Acinetobacter baumannii	Acinetobacter	469	Acinetobacter baumannii	470	Acinetobacter	baumannii
GCF_000611185.1	Acinetobacter baumannii	Acinetobacter	469	Acinetobacter baumannii	470	Acinetobacter	baumannii
GCF_001511875.1	Acinetobacter baumannii	Acinetobacter	469	Acinetobacter baumannii	470	Acinetobacter	baumannii
GCF_000627395.1	Acinetobacter baumannii	Acinetobacter	469	Acinetobacter baumannii	470	Acinetobacter	baumannii
GCF_001444215.1	Acinetobacter baumannii	Acinetobacter	469	Acinetobacter baumannii	470	Acinetobacter	baumannii
GCF_000682655.1	Acinetobacter baumannii	Acinetobacter	469	Acinetobacter baumannii	470	Acinetobacter	baumannii
GCF_001432625.1	Acinetobacter baumannii	Acinetobacter	469	Acinetobacter baumannii	470	Acinetobacter	baumannii
GCF_000787235.1	Acinetobacter baumannii	Acinetobacter	469	Acinetobacter baumannii	470	Acinetobacter	baumannii
GCF_000516335.2	Acinetobacter baumannii	Acinetobacter	469	Acinetobacter baumannii	470	Acinetobacter	baumannii
GCF_000588615.1	Acinetobacter baumannii	Acinetobacter	469	Acinetobacter baumannii	470	Acinetobacter	baumannii
GCF_000453805.1	Acinetobacter baumannii	Acinetobacter	469	Acinetobacter baumannii	470	Acinetobacter	baumannii
GCF_001441475.1	Acinetobacter baumannii	Acinetobacter	469	Acinetobacter baumannii	470	Acinetobacter	baumannii
GCF_000588115.1	Acinetobacter baumannii	Acinetobacter	469	Acinetobacter baumannii	470	Acinetobacter	baumannii
GCF_001432845.1	Acinetobacter baumannii	Acinetobacter	469	Acinetobacter baumannii	470	Acinetobacter	baumannii
GCF_000802885.1	Acinetobacter baumannii	Acinetobacter	469	Acinetobacter baumannii	470	Acinetobacter	baumannii
GCF_000627375.1	Acinetobacter baumannii	Acinetobacter	469	Acinetobacter baumannii	470	Acinetobacter	baumannii
GCF_000189655.1	Acinetobacter baumannii	Acinetobacter	469	Acinetobacter baumannii	470	Acinetobacter	baumannii
GCF_000301595.1	Acinetobacter baumannii	Acinetobacter	469	Acinetobacter baumannii	470	Acinetobacter	baumannii
GCF_001612455.1	Acinetobacter baumannii	Acinetobacter	469	Acinetobacter baumannii	470	Acinetobacter	baumannii
GCF_000759395.1	Acinetobacter baumannii	Acinetobacter	469	Acinetobacter baumannii	470	Acinetobacter	baumannii
GCF_000278665.1	Acinetobacter baumannii	Acinetobacter	469	Acinetobacter baumannii	470	Acinetobacter	baumannii
GCF_001432745.1	Acinetobacter baumannii	Acinetobacter	469	Acinetobacter baumannii	470	Acinetobacter	baumannii
GCF_000368125.1	Acinetobacter baumannii	Acinetobacter	469	Acinetobacter baumannii	470	Acinetobacter	baumannii
GCF_000588575.1	Acinetobacter baumannii	Acinetobacter	469	Acinetobacter baumannii	470	Acinetobacter	baumannii
GCF_000600675.1	Acinetobacter baumannii	Acinetobacter	469	Acinetobacter baumannii	470	Acinetobacter	baumannii
GCF_000939575.1	Acinetobacter baumannii	Acinetobacter	469	Acinetobacter baumannii	470	Acinetobacter	baumannii
GCF_000453385.1	Acinetobacter baumannii	Acinetobacter	469	Acinetobacter baumannii	470	Acinetobacter	baumannii
GCF_000580835.1	Acinetobacter baumannii	Acinetobacter	469	Acinetobacter baumannii	470	Acinetobacter	baumannii
GCF_000810765.3	Acinetobacter baumannii	Acinetobacter	469	Acinetobacter baumannii	470	Acinetobacter	baumannii
GCF_001612235.1	Acinetobacter baumannii	Acinetobacter	469	Acinetobacter baumannii	470	Acinetobacter	baumannii
GCF_000761465.1	Acinetobacter baumannii	Acinetobacter	469	Acinetobacter baumannii	470	Acinetobacter	baumannii
GCF_000589395.1	Acinetobacter baumannii	Acinetobacter	469	Acinetobacter baumannii	470	Acinetobacter	baumannii
GCF_000592235.1	Acinetobacter baumannii	Acinetobacter	469	Acinetobacter baumannii	470	Acinetobacter	baumannii
GCF_000353915.1	Acinetobacter baumannii	Acinetobacter	469	Acinetobacter baumannii	470	Acinetobacter	baumannii
GCF_000809385.3	Acinetobacter baumannii	Acinetobacter	469	Acinetobacter baumannii	470	Acinetobacter	baumannii
GCF_000681895.1	Acinetobacter baumannii	Acinetobacter	469	Acinetobacter baumannii	470	Acinetobacter	baumannii
GCF_000809685.3	Acinetobacter baumannii	Acinetobacter	469	Acinetobacter baumannii	470	Acinetobacter	baumannii
GCF_000810405.3	Acinetobacter baumannii	Acinetobacter	469	Acinetobacter baumannii	470	Acinetobacter	baumannii
GCF_001261895.2	Acinetobacter baumannii	Acinetobacter	469	Acinetobacter baumannii	470	Acinetobacter	baumannii
GCF_000588435.1	Acinetobacter baumannii	Acinetobacter	469	Acinetobacter baumannii	470	Acinetobacter	baumannii
GCF_000584175.1	Acinetobacter baumannii	Acinetobacter	469	Acinetobacter baumannii	470	Acinetobacter	baumannii
GCF_000811365.3	Acinetobacter baumannii	Acinetobacter	469	Acinetobacter baumannii	470	Acinetobacter	baumannii
GCF_001457535.1	Acinetobacter baumannii	Acinetobacter	469	Acinetobacter baumannii	470	Acinetobacter	baumannii
GCF_001416235.1	Acinetobacter baumannii	Acinetobacter	469	Acinetobacter baumannii	470	Acinetobacter	baumannii
GCF_000583515.1	Acinetobacter baumannii	Acinetobacter	469	Acinetobacter baumannii	470	Acinetobacter	baumannii
GCF_001432375.1	Acinetobacter baumannii	Acinetobacter	469	Acinetobacter baumannii	470	Acinetobacter	baumannii
GCF_000809645.3	Acinetobacter baumannii	Acinetobacter	469	Acinetobacter baumannii	470	Acinetobacter	baumannii
GCF_000581735.1	Acinetobacter baumannii	Acinetobacter	469	Acinetobacter baumannii	470	Acinetobacter	baumannii
GCF_000592295.1	Acinetobacter baumannii	Acinetobacter	469	Acinetobacter baumannii	470	Acinetobacter	baumannii
GCF_000580335.1	Acinetobacter baumannii	Acinetobacter	469	Acinetobacter baumannii	470	Acinetobacter	baumannii
GCF_000188215.1	Acinetobacter baumannii	Acinetobacter	469	Acinetobacter baumannii	470	Acinetobacter	baumannii
GCF_000584715.1	Acinetobacter baumannii	Acinetobacter	469	Acinetobacter baumannii	470	Acinetobacter	baumannii
GCF_000584295.1	Acinetobacter baumannii	Acinetobacter	469	Acinetobacter baumannii	470	Acinetobacter	baumannii
GCF_000681875.1	Acinetobacter baumannii	Acinetobacter	469	Acinetobacter baumannii	470	Acinetobacter	baumannii
GCF_000810915.3	Acinetobacter baumannii	Acinetobacter	469	Acinetobacter baumannii	470	Acinetobacter	baumannii
GCF_001512055.1	Acinetobacter baumannii	Acinetobacter	469	Acinetobacter baumannii	470	Acinetobacter	baumannii
GCF_000589475.1	Acinetobacter baumannii	Acinetobacter	469	Acinetobacter baumannii	470	Acinetobacter	baumannii
GCF_001433265.1	Acinetobacter baumannii	Acinetobacter	469	Acinetobacter baumannii	470	Acinetobacter	baumannii
GCF_000589795.1	Acinetobacter baumannii	Acinetobacter	469	Acinetobacter baumannii	470	Acinetobacter	baumannii
GCF_000301515.1	Acinetobacter baumannii	Acinetobacter	469	Acinetobacter baumannii	470	Acinetobacter	baumannii
GCF_000215005.1	Acinetobacter baumannii	Acinetobacter	469	Acinetobacter baumannii	470	Acinetobacter	baumannii
GCF_000278685.1	Acinetobacter baumannii	Acinetobacter	469	Acinetobacter baumannii	470	Acinetobacter	baumannii
GCF_000584735.1	Acinetobacter baumannii	Acinetobacter	469	Acinetobacter baumannii	470	Acinetobacter	baumannii
GCF_001512035.1	Acinetobacter baumannii	Acinetobacter	469	Acinetobacter baumannii	470	Acinetobacter	baumannii
GCF_000580375.1	Acinetobacter baumannii	Acinetobacter	469	Acinetobacter baumannii	470	Acinetobacter	baumannii
GCF_000810605.3	Acinetobacter baumannii	Acinetobacter	469	Acinetobacter baumannii	470	Acinetobacter	baumannii
GCF_000671495.1	Acinetobacter baumannii	Acinetobacter	469	Acinetobacter baumannii	470	Acinetobacter	baumannii
GCF_000589455.1	Acinetobacter baumannii	Acinetobacter	469	Acinetobacter baumannii	470	Acinetobacter	baumannii
GCF_000591655.1	Acinetobacter baumannii	Acinetobacter	469	Acinetobacter baumannii	470	Acinetobacter	baumannii
GCF_000746645.1	Acinetobacter baumannii	Acinetobacter	469	Acinetobacter baumannii	470	Acinetobacter	baumannii
GCF_000309115.1	Acinetobacter baumannii	Acinetobacter	469	Acinetobacter baumannii	470	Acinetobacter	baumannii
GCF_000810425.3	Acinetobacter baumannii	Acinetobacter	469	Acinetobacter baumannii	470	Acinetobacter	baumannii
GCF_000368105.1	Acinetobacter baumannii	Acinetobacter	469	Acinetobacter baumannii	470	Acinetobacter	baumannii
GCF_000516375.1	Acinetobacter baumannii	Acinetobacter	469	Acinetobacter baumannii	470	Acinetobacter	baumannii
GCF_000731975.1	Acinetobacter baumannii	Acinetobacter	469	Acinetobacter baumannii	470	Acinetobacter	baumannii
GCF_001416115.1	Acinetobacter baumannii	Acinetobacter	469	Acinetobacter baumannii	470	Acinetobacter	baumannii
GCF_001416625.1	Acinetobacter baumannii	Acinetobacter	469	Acinetobacter baumannii	470	Acinetobacter	baumannii
GCF_001512095.1	Acinetobacter baumannii	Acinetobacter	469	Acinetobacter baumannii	470	Acinetobacter	baumannii
GCF_000811925.3	Acinetobacter baumannii	Acinetobacter	469	Acinetobacter baumannii	470	Acinetobacter	baumannii
GCF_000810935.3	Acinetobacter baumannii	Acinetobacter	469	Acinetobacter baumannii	470	Acinetobacter	baumannii
GCF_001414735.1	Acinetobacter baumannii	Acinetobacter	469	Acinetobacter baumannii	470	Acinetobacter	baumannii
GCF_000787295.1	Acinetobacter baumannii	Acinetobacter	469	Acinetobacter baumannii	470	Acinetobacter	baumannii
GCF_000582015.1	Acinetobacter baumannii	Acinetobacter	469	Acinetobacter baumannii	470	Acinetobacter	baumannii
GCF_000671675.1	Acinetobacter baumannii	Acinetobacter	469	Acinetobacter baumannii	470	Acinetobacter	baumannii
GCF_000516115.1	Acinetobacter baumannii	Acinetobacter	469	Acinetobacter baumannii	470	Acinetobacter	baumannii
GCF_000939495.1	Acinetobacter baumannii	Acinetobacter	469	Acinetobacter baumannii	470	Acinetobacter	baumannii
GCF_000600795.1	Acinetobacter baumannii	Acinetobacter	469	Acinetobacter baumannii	470	Acinetobacter	baumannii
GCF_000627695.1	Acinetobacter baumannii	Acinetobacter	469	Acinetobacter baumannii	470	Acinetobacter	baumannii
GCF_000369245.1	Acinetobacter baumannii	Acinetobacter	469	Acinetobacter baumannii	470	Acinetobacter	baumannii
GCF_000353935.1	Acinetobacter baumannii	Acinetobacter	469	Acinetobacter baumannii	470	Acinetobacter	baumannii
GCF_001531455.1	Acinetobacter baumannii	Acinetobacter	469	Acinetobacter baumannii	470	Acinetobacter	baumannii
GCF_000592255.1	Acinetobacter baumannii	Acinetobacter	469	Acinetobacter baumannii	470	Acinetobacter	baumannii
GCF_000589355.1	Acinetobacter baumannii	Acinetobacter	469	Acinetobacter baumannii	470	Acinetobacter	baumannii
GCF_000682195.1	Acinetobacter baumannii	Acinetobacter	469	Acinetobacter baumannii	470	Acinetobacter	baumannii
GCF_000592535.1	Acinetobacter baumannii	Acinetobacter	469	Acinetobacter baumannii	470	Acinetobacter	baumannii
GCF_000369305.1	Acinetobacter baumannii	Acinetobacter	469	Acinetobacter baumannii	470	Acinetobacter	baumannii
GCF_001416715.1	Acinetobacter baumannii	Acinetobacter	469	Acinetobacter baumannii	470	Acinetobacter	baumannii
GCF_000581675.1	Acinetobacter baumannii	Acinetobacter	469	Acinetobacter baumannii	470	Acinetobacter	baumannii
GCF_000731965.1	Acinetobacter baumannii	Acinetobacter	469	Acinetobacter baumannii	470	Acinetobacter	baumannii
GCF_000302155.1	Acinetobacter baumannii	Acinetobacter	469	Acinetobacter baumannii	470	Acinetobacter	baumannii
GCF_000589695.1	Acinetobacter baumannii	Acinetobacter	469	Acinetobacter baumannii	470	Acinetobacter	baumannii
GCF_000811525.3	Acinetobacter baumannii	Acinetobacter	469	Acinetobacter baumannii	470	Acinetobacter	baumannii
GCF_001007685.1	Acinetobacter baumannii	Acinetobacter	469	Acinetobacter baumannii	470	Acinetobacter	baumannii
GCF_000939535.1	Acinetobacter baumannii	Acinetobacter	469	Acinetobacter baumannii	470	Acinetobacter	baumannii
GCF_001541725.1	Acinetobacter baumannii	Acinetobacter	469	Acinetobacter baumannii	470	Acinetobacter	baumannii
GCF_000588895.1	Acinetobacter baumannii	Acinetobacter	469	Acinetobacter baumannii	470	Acinetobacter	baumannii
GCF_000580435.1	Acinetobacter baumannii	Acinetobacter	469	Acinetobacter baumannii	470	Acinetobacter	baumannii
GCF_000515875.2	Acinetobacter baumannii	Acinetobacter	469	Acinetobacter baumannii	470	Acinetobacter	baumannii
GCF_000515495.1	Acinetobacter baumannii	Acinetobacter	469	Acinetobacter baumannii	470	Acinetobacter	baumannii
GCF_000931755.1	Acinetobacter baumannii	Acinetobacter	469	Acinetobacter baumannii	470	Acinetobacter	baumannii
GCF_000805635.1	Acinetobacter baumannii	Acinetobacter	469	Acinetobacter baumannii	470	Acinetobacter	baumannii
GCF_000369205.1	Acinetobacter baumannii	Acinetobacter	469	Acinetobacter baumannii	470	Acinetobacter	baumannii
GCF_000297955.1	Acinetobacter baumannii	Acinetobacter	469	Acinetobacter baumannii	470	Acinetobacter	baumannii
GCF_000600595.1	Acinetobacter baumannii	Acinetobacter	469	Acinetobacter baumannii	470	Acinetobacter	baumannii
GCF_000681675.1	Acinetobacter baumannii	Acinetobacter	469	Acinetobacter baumannii	470	Acinetobacter	baumannii
GCF_001441485.1	Acinetobacter baumannii	Acinetobacter	469	Acinetobacter baumannii	470	Acinetobacter	baumannii
GCF_000584695.1	Acinetobacter baumannii	Acinetobacter	469	Acinetobacter baumannii	470	Acinetobacter	baumannii
GCF_000515695.1	Acinetobacter baumannii	Acinetobacter	469	Acinetobacter baumannii	470	Acinetobacter	baumannii
GCF_000810385.3	Acinetobacter baumannii	Acinetobacter	469	Acinetobacter baumannii	470	Acinetobacter	baumannii
GCF_001485005.1	Acinetobacter baylyi	Acinetobacter	469	Acinetobacter baylyi	202950	Acinetobacter	baylyi
GCF_000621045.1	Acinetobacter baylyi	Acinetobacter	469	Acinetobacter baylyi	202950	Acinetobacter	baylyi
GCF_000368685.1	Acinetobacter baylyi	Acinetobacter	469	Acinetobacter baylyi	202950	Acinetobacter	baylyi
GCF_000302115.1	Acinetobacter baylyi	Acinetobacter	469	Acinetobacter baylyi	202950	Acinetobacter	baylyi
GCF_000368985.1	Acinetobacter beijerinckii	Acinetobacter	469	Acinetobacter beijerinckii	262668	Acinetobacter	beijerinckii
GCF_000369005.1	Acinetobacter beijerinckii	Acinetobacter	469	Acinetobacter beijerinckii	262668	Acinetobacter	beijerinckii
GCF_000931715.1	Acinetobacter beijerinckii	Acinetobacter	469	Acinetobacter beijerinckii	262668	Acinetobacter	beijerinckii
GCF_001500155.1	Acinetobacter bereziniae	Acinetobacter	469	Acinetobacter bereziniae	106648	Acinetobacter	bereziniae
GCF_000368505.1	Acinetobacter bereziniae	Acinetobacter	469	Acinetobacter bereziniae	106648	Acinetobacter	bereziniae
GCF_000368925.1	Acinetobacter bereziniae	Acinetobacter	469	Acinetobacter bereziniae	106648	Acinetobacter	bereziniae
GCF_000825165.1	Acinetobacter bereziniae	Acinetobacter	469	Acinetobacter bereziniae	106648	Acinetobacter	bereziniae
GCF_000753985.1	Acinetobacter bereziniae	Acinetobacter	469	Acinetobacter bereziniae	106648	Acinetobacter	bereziniae
GCF_001485025.1	Acinetobacter bouvetii	Acinetobacter	469	Acinetobacter bouvetii	202951	Acinetobacter	bouvetii
GCF_000373725.1	Acinetobacter bouvetii	Acinetobacter	469	Acinetobacter bouvetii	202951	Acinetobacter	bouvetii
GCF_000368865.1	Acinetobacter bouvetii	Acinetobacter	469	Acinetobacter bouvetii	202951	Acinetobacter	bouvetii
GCF_000368645.1	Acinetobacter brisouii	Acinetobacter	469	Acinetobacter brisouii	396323	Acinetobacter	brisouii
GCF_000488275.1	Acinetobacter brisouii	Acinetobacter	469	Acinetobacter brisouii	396323	Acinetobacter	brisouii
GCF_000931655.1	Acinetobacter brisouii	Acinetobacter	469	Acinetobacter brisouii	396323	Acinetobacter	brisouii
GCF_000368965.1	Acinetobacter calcoaceticus	Acinetobacter	469	Acinetobacter calcoaceticus	471	Acinetobacter	calcoaceticus
GCF_000367865.1	Acinetobacter calcoaceticus	Acinetobacter	469	Acinetobacter calcoaceticus	471	Acinetobacter	calcoaceticus
GCF_000162035.1	Acinetobacter calcoaceticus	Acinetobacter	469	Acinetobacter calcoaceticus	471	Acinetobacter	calcoaceticus
GCF_000302295.1	Acinetobacter calcoaceticus	Acinetobacter	469	Acinetobacter calcoaceticus	471	Acinetobacter	calcoaceticus
GCF_000301675.1	Acinetobacter calcoaceticus	Acinetobacter	469	Acinetobacter calcoaceticus	471	Acinetobacter	calcoaceticus
GCF_000309015.1	Acinetobacter calcoaceticus	Acinetobacter	469	Acinetobacter calcoaceticus	471	Acinetobacter	calcoaceticus
GCF_000368945.1	Acinetobacter calcoaceticus	Acinetobacter	469	Acinetobacter calcoaceticus	471	Acinetobacter	calcoaceticus
GCF_000818215.1	Acinetobacter calcoaceticus	Acinetobacter	469	Acinetobacter calcoaceticus	471	Acinetobacter	calcoaceticus
GCF_000952075.1	Acinetobacter calcoaceticus	Acinetobacter	469	Acinetobacter calcoaceticus	471	Acinetobacter	calcoaceticus
GCF_000931735.1	Acinetobacter calcoaceticus	Acinetobacter	469	Acinetobacter calcoaceticus	471	Acinetobacter	calcoaceticus
GCF_000368565.1	Acinetobacter gerneri	Acinetobacter	469	Acinetobacter gerneri	202952	Acinetobacter	gerneri
GCF_000430245.1	Acinetobacter gerneri	Acinetobacter	469	Acinetobacter gerneri	202952	Acinetobacter	gerneri
GCF_000747725.1	Acinetobacter gerneri	Acinetobacter	469	Acinetobacter gerneri	202952	Acinetobacter	gerneri
GCF_000368485.1	Acinetobacter guillouiae	Acinetobacter	469	Acinetobacter guillouiae	106649	Acinetobacter	guillouiae
GCF_000368145.1	Acinetobacter guillouiae	Acinetobacter	469	Acinetobacter guillouiae	106649	Acinetobacter	guillouiae
GCF_000414055.1	Acinetobacter guillouiae	Acinetobacter	469	Acinetobacter guillouiae	106649	Acinetobacter	guillouiae
GCF_000829655.1	Acinetobacter guillouiae	Acinetobacter	469	Acinetobacter guillouiae	106649	Acinetobacter	guillouiae
GCF_000488195.1	Acinetobacter gyllenbergii	Acinetobacter	469	Acinetobacter gyllenbergii	134534	Acinetobacter	gyllenbergii
GCF_000414075.1	Acinetobacter gyllenbergii	Acinetobacter	469	Acinetobacter gyllenbergii	134534	Acinetobacter	gyllenbergii
GCF_000413855.1	Acinetobacter gyllenbergii	Acinetobacter	469	Acinetobacter gyllenbergii	134534	Acinetobacter	gyllenbergii
GCF_000931695.1	Acinetobacter gyllenbergii	Acinetobacter	469	Acinetobacter gyllenbergii	134534	Acinetobacter	gyllenbergii
GCF_000430205.1	Acinetobacter haemolyticus	Acinetobacter	469	Acinetobacter haemolyticus	29430	Acinetobacter	haemolyticus
GCF_000309035.1	Acinetobacter haemolyticus	Acinetobacter	469	Acinetobacter haemolyticus	29430	Acinetobacter	haemolyticus
GCF_000301715.1	Acinetobacter haemolyticus	Acinetobacter	469	Acinetobacter haemolyticus	29430	Acinetobacter	haemolyticus
GCF_000369085.1	Acinetobacter haemolyticus	Acinetobacter	469	Acinetobacter haemolyticus	29430	Acinetobacter	haemolyticus
GCF_000164055.1	Acinetobacter haemolyticus	Acinetobacter	469	Acinetobacter haemolyticus	29430	Acinetobacter	haemolyticus
GCF_000830135.1	Acinetobacter haemolyticus	Acinetobacter	469	Acinetobacter haemolyticus	29430	Acinetobacter	haemolyticus
GCF_000302315.1	Acinetobacter haemolyticus	Acinetobacter	469	Acinetobacter haemolyticus	29430	Acinetobacter	haemolyticus
GCF_000369065.1	Acinetobacter haemolyticus	Acinetobacter	469	Acinetobacter haemolyticus	29430	Acinetobacter	haemolyticus
GCF_000413875.1	Acinetobacter indicus	Acinetobacter	469	Acinetobacter indicus	756892	Acinetobacter	indicus
GCF_000830155.1	Acinetobacter indicus	Acinetobacter	469	Acinetobacter indicus	756892	Acinetobacter	indicus
GCF_000964095.1	Acinetobacter indicus	Acinetobacter	469	Acinetobacter indicus	756892	Acinetobacter	indicus
GCF_000488255.1	Acinetobacter indicus	Acinetobacter	469	Acinetobacter indicus	756892	Acinetobacter	indicus
GCF_001484935.1	Acinetobacter johnsonii	Acinetobacter	469	Acinetobacter johnsonii	40214	Acinetobacter	johnsonii
GCF_000302335.1	Acinetobacter johnsonii	Acinetobacter	469	Acinetobacter johnsonii	40214	Acinetobacter	johnsonii
GCF_000368045.1	Acinetobacter johnsonii	Acinetobacter	469	Acinetobacter johnsonii	40214	Acinetobacter	johnsonii
GCF_000301735.1	Acinetobacter johnsonii	Acinetobacter	469	Acinetobacter johnsonii	40214	Acinetobacter	johnsonii
GCF_000949655.1	Acinetobacter johnsonii	Acinetobacter	469	Acinetobacter johnsonii	40214	Acinetobacter	johnsonii
GCF_000162075.1	Acinetobacter junii	Acinetobacter	469	Acinetobacter junii	40215	Acinetobacter	junii
GCF_000368665.1	Acinetobacter junii	Acinetobacter	469	Acinetobacter junii	40215	Acinetobacter	junii
GCF_000831735.1	Acinetobacter junii	Acinetobacter	469	Acinetobacter junii	40215	Acinetobacter	junii
GCF_000775815.1	Acinetobacter junii	Acinetobacter	469	Acinetobacter junii	40215	Acinetobacter	junii
GCF_000302355.1	Acinetobacter junii	Acinetobacter	469	Acinetobacter junii	40215	Acinetobacter	junii
GCF_000830115.1	Acinetobacter junii	Acinetobacter	469	Acinetobacter junii	40215	Acinetobacter	junii
GCF_000813495.1	Acinetobacter junii	Acinetobacter	469	Acinetobacter junii	40215	Acinetobacter	junii
GCF_000430225.1	Acinetobacter junii	Acinetobacter	469	Acinetobacter junii	40215	Acinetobacter	junii
GCF_000368745.1	Acinetobacter junii	Acinetobacter	469	Acinetobacter junii	40215	Acinetobacter	junii
GCF_000368765.1	Acinetobacter junii	Acinetobacter	469	Acinetobacter junii	40215	Acinetobacter	junii
GCF_000487975.1	Acinetobacter lwoffii	Acinetobacter	469	Acinetobacter lwoffii	28090	Acinetobacter	lwoffii
GCF_000369145.1	Acinetobacter lwoffii	Acinetobacter	469	Acinetobacter lwoffii	28090	Acinetobacter	lwoffii
GCF_000162095.1	Acinetobacter lwoffii	Acinetobacter	469	Acinetobacter lwoffii	28090	Acinetobacter	lwoffii
GCF_000368165.1	Acinetobacter lwoffii	Acinetobacter	469	Acinetobacter lwoffii	28090	Acinetobacter	lwoffii
GCF_000836095.1	Acinetobacter lwoffii	Acinetobacter	469	Acinetobacter lwoffii	28090	Acinetobacter	lwoffii
GCF_000248355.1	Acinetobacter lwoffii	Acinetobacter	469	Acinetobacter lwoffii	28090	Acinetobacter	lwoffii
GCF_000301755.1	Acinetobacter lwoffii	Acinetobacter	469	Acinetobacter lwoffii	28090	Acinetobacter	lwoffii
GCF_000369125.1	Acinetobacter lwoffii	Acinetobacter	469	Acinetobacter lwoffii	28090	Acinetobacter	lwoffii
GCF_000931675.1	Acinetobacter nosocomialis	Acinetobacter	469	Acinetobacter nosocomialis	106654	Acinetobacter	nosocomialis
GCF_000836055.1	Acinetobacter nosocomialis	Acinetobacter	469	Acinetobacter nosocomialis	106654	Acinetobacter	nosocomialis
GCF_000931795.1	Acinetobacter nosocomialis	Acinetobacter	469	Acinetobacter nosocomialis	106654	Acinetobacter	nosocomialis
GCF_000949695.1	Acinetobacter nosocomialis	Acinetobacter	469	Acinetobacter nosocomialis	106654	Acinetobacter	nosocomialis
GCF_001471615.1	Acinetobacter nosocomialis	Acinetobacter	469	Acinetobacter nosocomialis	106654	Acinetobacter	nosocomialis
GCF_000588595.1	Acinetobacter nosocomialis	Acinetobacter	469	Acinetobacter nosocomialis	106654	Acinetobacter	nosocomialis
GCF_001056825.1	Acinetobacter nosocomialis	Acinetobacter	469	Acinetobacter nosocomialis	106654	Acinetobacter	nosocomialis
GCF_000949675.1	Acinetobacter nosocomialis	Acinetobacter	469	Acinetobacter nosocomialis	106654	Acinetobacter	nosocomialis
GCF_000931775.1	Acinetobacter nosocomialis	Acinetobacter	469	Acinetobacter nosocomialis	106654	Acinetobacter	nosocomialis
GCF_000775895.1	Acinetobacter nosocomialis	Acinetobacter	469	Acinetobacter nosocomialis	106654	Acinetobacter	nosocomialis
GCF_000949715.1	Acinetobacter nosocomialis	Acinetobacter	469	Acinetobacter nosocomialis	106654	Acinetobacter	nosocomialis
GCF_000584615.1	Acinetobacter nosocomialis	Acinetobacter	469	Acinetobacter nosocomialis	106654	Acinetobacter	nosocomialis
GCF_000368085.1	Acinetobacter nosocomialis	Acinetobacter	469	Acinetobacter nosocomialis	106654	Acinetobacter	nosocomialis
GCF_000775795.1	Acinetobacter nosocomialis	Acinetobacter	469	Acinetobacter nosocomialis	106654	Acinetobacter	nosocomialis
GCF_000488235.1	Acinetobacter oleivorans	Acinetobacter	469	Acinetobacter oleivorans	1148157	Acinetobacter	oleivorans
GCF_000196795.1	Acinetobacter oleivorans	Acinetobacter	469	Acinetobacter oleivorans	1148157	Acinetobacter	oleivorans
GCF_001485085.1	Acinetobacter parvus	Acinetobacter	469	Acinetobacter parvus	134533	Acinetobacter	parvus
GCF_000368005.1	Acinetobacter parvus	Acinetobacter	469	Acinetobacter parvus	134533	Acinetobacter	parvus
GCF_000248155.1	Acinetobacter parvus	Acinetobacter	469	Acinetobacter parvus	134533	Acinetobacter	parvus
GCF_000368025.1	Acinetobacter parvus	Acinetobacter	469	Acinetobacter parvus	134533	Acinetobacter	parvus
GCF_000230465.1	Acinetobacter pittii	Acinetobacter	469	Acinetobacter pittii	48296	Acinetobacter	pittii
GCF_000949755.1	Acinetobacter pittii	Acinetobacter	469	Acinetobacter pittii	48296	Acinetobacter	pittii
GCF_001433225.1	Acinetobacter pittii	Acinetobacter	469	Acinetobacter pittii	48296	Acinetobacter	pittii
GCF_000682355.1	Acinetobacter pittii	Acinetobacter	469	Acinetobacter pittii	48296	Acinetobacter	pittii
GCF_000836015.1	Acinetobacter pittii	Acinetobacter	469	Acinetobacter pittii	48296	Acinetobacter	pittii
GCF_000817365.1	Acinetobacter pittii	Acinetobacter	469	Acinetobacter pittii	48296	Acinetobacter	pittii
GCF_001432935.1	Acinetobacter pittii	Acinetobacter	469	Acinetobacter pittii	48296	Acinetobacter	pittii
GCF_000934125.1	Acinetobacter pittii	Acinetobacter	469	Acinetobacter pittii	48296	Acinetobacter	pittii
GCF_000584015.1	Acinetobacter pittii	Acinetobacter	469	Acinetobacter pittii	48296	Acinetobacter	pittii
GCF_001415105.1	Acinetobacter pittii	Acinetobacter	469	Acinetobacter pittii	48296	Acinetobacter	pittii
GCF_001433185.1	Acinetobacter pittii	Acinetobacter	469	Acinetobacter pittii	48296	Acinetobacter	pittii
GCF_000582075.1	Acinetobacter pittii	Acinetobacter	469	Acinetobacter pittii	48296	Acinetobacter	pittii
GCF_000588415.1	Acinetobacter pittii	Acinetobacter	469	Acinetobacter pittii	48296	Acinetobacter	pittii
GCF_001617545.1	Acinetobacter pittii	Acinetobacter	469	Acinetobacter pittii	48296	Acinetobacter	pittii
GCF_000949735.1	Acinetobacter pittii	Acinetobacter	469	Acinetobacter pittii	48296	Acinetobacter	pittii
GCF_000583395.1	Acinetobacter pittii	Acinetobacter	469	Acinetobacter pittii	48296	Acinetobacter	pittii
GCF_000949775.1	Acinetobacter pittii	Acinetobacter	469	Acinetobacter pittii	48296	Acinetobacter	pittii
GCF_000931915.1	Acinetobacter pittii	Acinetobacter	469	Acinetobacter pittii	48296	Acinetobacter	pittii
GCF_000163635.1	Acinetobacter pittii	Acinetobacter	469	Acinetobacter pittii	48296	Acinetobacter	pittii
GCF_000584215.1	Acinetobacter pittii	Acinetobacter	469	Acinetobacter pittii	48296	Acinetobacter	pittii
GCF_001415685.1	Acinetobacter pittii	Acinetobacter	469	Acinetobacter pittii	48296	Acinetobacter	pittii
GCF_000580955.1	Acinetobacter pittii	Acinetobacter	469	Acinetobacter pittii	48296	Acinetobacter	pittii
GCF_000681815.1	Acinetobacter pittii	Acinetobacter	469	Acinetobacter pittii	48296	Acinetobacter	pittii
GCF_000581095.1	Acinetobacter pittii	Acinetobacter	469	Acinetobacter pittii	48296	Acinetobacter	pittii
GCF_000580855.1	Acinetobacter pittii	Acinetobacter	469	Acinetobacter pittii	48296	Acinetobacter	pittii
GCF_000529235.1	Acinetobacter pittii	Acinetobacter	469	Acinetobacter pittii	48296	Acinetobacter	pittii
GCF_000588395.1	Acinetobacter pittii	Acinetobacter	469	Acinetobacter pittii	48296	Acinetobacter	pittii
GCF_001433125.1	Acinetobacter pittii	Acinetobacter	469	Acinetobacter pittii	48296	Acinetobacter	pittii
GCF_001416185.1	Acinetobacter pittii	Acinetobacter	469	Acinetobacter pittii	48296	Acinetobacter	pittii
GCF_000949795.1	Acinetobacter pittii	Acinetobacter	469	Acinetobacter pittii	48296	Acinetobacter	pittii
GCF_001432835.1	Acinetobacter pittii	Acinetobacter	469	Acinetobacter pittii	48296	Acinetobacter	pittii
GCF_001415895.1	Acinetobacter pittii	Acinetobacter	469	Acinetobacter pittii	48296	Acinetobacter	pittii
GCF_001577285.1	Acinetobacter pittii	Acinetobacter	469	Acinetobacter pittii	48296	Acinetobacter	pittii
GCF_001415935.1	Acinetobacter pittii	Acinetobacter	469	Acinetobacter pittii	48296	Acinetobacter	pittii
GCF_001056355.1	Acinetobacter pittii	Acinetobacter	469	Acinetobacter pittii	48296	Acinetobacter	pittii
GCF_000787015.1	Acinetobacter pittii	Acinetobacter	469	Acinetobacter pittii	48296	Acinetobacter	pittii
GCF_001415485.1	Acinetobacter pittii	Acinetobacter	469	Acinetobacter pittii	48296	Acinetobacter	pittii
GCF_001415865.1	Acinetobacter pittii	Acinetobacter	469	Acinetobacter pittii	48296	Acinetobacter	pittii
GCF_001432775.1	Acinetobacter pittii	Acinetobacter	469	Acinetobacter pittii	48296	Acinetobacter	pittii
GCF_001432635.1	Acinetobacter pittii	Acinetobacter	469	Acinetobacter pittii	48296	Acinetobacter	pittii
GCF_000931895.1	Acinetobacter pittii	Acinetobacter	469	Acinetobacter pittii	48296	Acinetobacter	pittii
GCF_000746375.1	Acinetobacter pittii	Acinetobacter	469	Acinetobacter pittii	48296	Acinetobacter	pittii
GCF_001432435.1	Acinetobacter pittii	Acinetobacter	469	Acinetobacter pittii	48296	Acinetobacter	pittii
GCF_000582195.1	Acinetobacter pittii	Acinetobacter	469	Acinetobacter pittii	48296	Acinetobacter	pittii
GCF_000341835.1	Acinetobacter pittii	Acinetobacter	469	Acinetobacter pittii	48296	Acinetobacter	pittii
GCF_000191145.1	Acinetobacter pittii	Acinetobacter	469	Acinetobacter pittii	48296	Acinetobacter	pittii
GCF_000302375.1	Acinetobacter pittii	Acinetobacter	469	Acinetobacter pittii	48296	Acinetobacter	pittii
GCF_001415145.1	Acinetobacter pittii	Acinetobacter	469	Acinetobacter pittii	48296	Acinetobacter	pittii
GCF_001415185.1	Acinetobacter pittii	Acinetobacter	469	Acinetobacter pittii	48296	Acinetobacter	pittii
GCF_001415175.1	Acinetobacter pittii	Acinetobacter	469	Acinetobacter pittii	48296	Acinetobacter	pittii
GCF_000369045.1	Acinetobacter pittii	Acinetobacter	469	Acinetobacter pittii	48296	Acinetobacter	pittii
GCF_001415245.1	Acinetobacter pittii	Acinetobacter	469	Acinetobacter pittii	48296	Acinetobacter	pittii
GCF_001432715.1	Acinetobacter pittii	Acinetobacter	469	Acinetobacter pittii	48296	Acinetobacter	pittii
GCF_000805655.1	Acinetobacter pittii	Acinetobacter	469	Acinetobacter pittii	48296	Acinetobacter	pittii
GCF_001415585.1	Acinetobacter pittii	Acinetobacter	469	Acinetobacter pittii	48296	Acinetobacter	pittii
GCF_000681535.1	Acinetobacter pittii	Acinetobacter	469	Acinetobacter pittii	48296	Acinetobacter	pittii
GCF_001416065.1	Acinetobacter pittii	Acinetobacter	469	Acinetobacter pittii	48296	Acinetobacter	pittii
GCF_001433295.1	Acinetobacter pittii	Acinetobacter	469	Acinetobacter pittii	48296	Acinetobacter	pittii
GCF_001416335.1	Acinetobacter pittii	Acinetobacter	469	Acinetobacter pittii	48296	Acinetobacter	pittii
GCF_000800555.1	Acinetobacter pittii	Acinetobacter	469	Acinetobacter pittii	48296	Acinetobacter	pittii
GCF_001414725.1	Acinetobacter pittii	Acinetobacter	469	Acinetobacter pittii	48296	Acinetobacter	pittii
GCF_001414705.1	Acinetobacter pittii	Acinetobacter	469	Acinetobacter pittii	48296	Acinetobacter	pittii
GCF_000308075.1	Acinetobacter radioresistens	Acinetobacter	469	Acinetobacter radioresistens	40216	Acinetobacter	radioresistens
GCF_000368905.1	Acinetobacter radioresistens	Acinetobacter	469	Acinetobacter radioresistens	40216	Acinetobacter	radioresistens
GCF_000301795.1	Acinetobacter radioresistens	Acinetobacter	469	Acinetobacter radioresistens	40216	Acinetobacter	radioresistens
GCF_000972345.1	Acinetobacter radioresistens	Acinetobacter	469	Acinetobacter radioresistens	40216	Acinetobacter	radioresistens
GCF_000286595.1	Acinetobacter radioresistens	Acinetobacter	469	Acinetobacter radioresistens	40216	Acinetobacter	radioresistens
GCF_000413895.1	Acinetobacter rudis	Acinetobacter	469	Acinetobacter rudis	632955	Acinetobacter	rudis
GCF_000829675.1	Acinetobacter rudis	Acinetobacter	469	Acinetobacter rudis	632955	Acinetobacter	rudis
GCF_001485065.1	Acinetobacter schindleri	Acinetobacter	469	Acinetobacter schindleri	108981	Acinetobacter	schindleri
GCF_000368625.1	Acinetobacter schindleri	Acinetobacter	469	Acinetobacter schindleri	108981	Acinetobacter	schindleri
GCF_000301815.1	Acinetobacter schindleri	Acinetobacter	469	Acinetobacter schindleri	108981	Acinetobacter	schindleri
GCF_000368465.1	Acinetobacter schindleri	Acinetobacter	469	Acinetobacter schindleri	108981	Acinetobacter	schindleri
GCF_000633005.1	Acinetobacter soli	Acinetobacter	469	Acinetobacter soli	487316	Acinetobacter	soli
GCF_000760595.1	Acinetobacter soli	Acinetobacter	469	Acinetobacter soli	487316	Acinetobacter	soli
GCF_001414585.1	Acinetobacter soli	Acinetobacter	469	Acinetobacter soli	487316	Acinetobacter	soli
GCF_000368705.1	Acinetobacter soli	Acinetobacter	469	Acinetobacter soli	487316	Acinetobacter	soli
GCF_000368725.1	Acinetobacter soli	Acinetobacter	469	Acinetobacter soli	487316	Acinetobacter	soli
GCF_000760555.1	Acinetobacter tandoii	Acinetobacter	469	Acinetobacter tandoii	202954	Acinetobacter	tandoii
GCF_000400735.1	Acinetobacter tandoii	Acinetobacter	469	Acinetobacter tandoii	202954	Acinetobacter	tandoii
GCF_000621065.1	Acinetobacter tandoii	Acinetobacter	469	Acinetobacter tandoii	202954	Acinetobacter	tandoii
GCF_000374425.1	Acinetobacter tjernbergiae	Acinetobacter	469	Acinetobacter tjernbergiae	202955	Acinetobacter	tjernbergiae
GCF_000759995.1	Acinetobacter tjernbergiae	Acinetobacter	469	Acinetobacter tjernbergiae	202955	Acinetobacter	tjernbergiae
GCF_000488175.1	Acinetobacter tjernbergiae	Acinetobacter	469	Acinetobacter tjernbergiae	202955	Acinetobacter	tjernbergiae
GCF_000688495.1	Acinetobacter towneri	Acinetobacter	469	Acinetobacter towneri	202956	Acinetobacter	towneri
GCF_000368785.1	Acinetobacter towneri	Acinetobacter	469	Acinetobacter towneri	202956	Acinetobacter	towneri
GCF_000760575.1	Acinetobacter towneri	Acinetobacter	469	Acinetobacter towneri	202956	Acinetobacter	towneri
GCF_000934145.1	Acinetobacter ursingii	Acinetobacter	469	Acinetobacter ursingii	108980	Acinetobacter	ursingii
GCF_000949815.1	Acinetobacter ursingii	Acinetobacter	469	Acinetobacter ursingii	108980	Acinetobacter	ursingii
GCF_000369885.1	Acinetobacter ursingii	Acinetobacter	469	Acinetobacter ursingii	108980	Acinetobacter	ursingii
GCF_000248135.1	Acinetobacter ursingii	Acinetobacter	469	Acinetobacter ursingii	108980	Acinetobacter	ursingii
GCF_000368825.1	Acinetobacter ursingii	Acinetobacter	469	Acinetobacter ursingii	108980	Acinetobacter	ursingii
GCF_001485045.1	Acinetobacter ursingii	Acinetobacter	469	Acinetobacter ursingii	108980	Acinetobacter	ursingii
GCF_000368845.1	Acinetobacter ursingii	Acinetobacter	469	Acinetobacter ursingii	108980	Acinetobacter	ursingii
GCF_000949835.1	Acinetobacter ursingii	Acinetobacter	469	Acinetobacter ursingii	108980	Acinetobacter	ursingii
GCF_000368585.1	Acinetobacter venetianus	Acinetobacter	469	Acinetobacter venetianus	52133	Acinetobacter	venetianus
GCF_001584655.1	Acinetobacter venetianus	Acinetobacter	469	Acinetobacter venetianus	52133	Acinetobacter	venetianus
GCF_001584645.1	Acinetobacter venetianus	Acinetobacter	469	Acinetobacter venetianus	52133	Acinetobacter	venetianus
GCF_000308235.1	Acinetobacter venetianus	Acinetobacter	469	Acinetobacter venetianus	52133	Acinetobacter	venetianus
GCF_001584675.1	Acinetobacter venetianus	Acinetobacter	469	Acinetobacter venetianus	52133	Acinetobacter	venetianus
GCF_000271425.1	Acinetobacter venetianus	Acinetobacter	469	Acinetobacter venetianus	52133	Acinetobacter	venetianus
GCF_001577485.1	Acinetobacter venetianus	Acinetobacter	469	Acinetobacter venetianus	52133	Acinetobacter	venetianus
GCF_001484985.1	Acinetobacter venetianus	Acinetobacter	469	Acinetobacter venetianus	52133	Acinetobacter	venetianus
GCF_001584665.1	Acinetobacter venetianus	Acinetobacter	469	Acinetobacter venetianus	52133	Acinetobacter	venetianus
GCF_000429185.1	Actinoalloteichus cyanogriseus	Actinoalloteichus	65496	Actinoalloteichus cyanogriseus	65497	Actinoalloteichus	cyanogriseus
GCF_000716095.1	Actinoalloteichus cyanogriseus	Actinoalloteichus	65496	Actinoalloteichus cyanogriseus	65497	Actinoalloteichus	cyanogriseus
GCF_000718005.1	Actinoalloteichus cyanogriseus	Actinoalloteichus	65496	Actinoalloteichus cyanogriseus	65497	Actinoalloteichus	cyanogriseus
GCF_000295915.1	Actinobacillus pleuropneumoniae	Actinobacillus	713	Actinobacillus pleuropneumoniae	715	Actinobacillus	pleuropneumoniae
GCF_000178635.1	Actinobacillus pleuropneumoniae	Actinobacillus	713	Actinobacillus pleuropneumoniae	715	Actinobacillus	pleuropneumoniae
GCF_000178595.1	Actinobacillus pleuropneumoniae	Actinobacillus	713	Actinobacillus pleuropneumoniae	715	Actinobacillus	pleuropneumoniae
GCF_000167095.1	Actinobacillus pleuropneumoniae	Actinobacillus	713	Actinobacillus pleuropneumoniae	715	Actinobacillus	pleuropneumoniae
GCF_000020405.1	Actinobacillus pleuropneumoniae	Actinobacillus	713	Actinobacillus pleuropneumoniae	715	Actinobacillus	pleuropneumoniae
GCF_000178495.1	Actinobacillus pleuropneumoniae	Actinobacillus	713	Actinobacillus pleuropneumoniae	715	Actinobacillus	pleuropneumoniae
GCF_000178655.1	Actinobacillus pleuropneumoniae	Actinobacillus	713	Actinobacillus pleuropneumoniae	715	Actinobacillus	pleuropneumoniae
GCF_000179295.1	Actinobacillus pleuropneumoniae	Actinobacillus	713	Actinobacillus pleuropneumoniae	715	Actinobacillus	pleuropneumoniae
GCF_000178555.1	Actinobacillus pleuropneumoniae	Actinobacillus	713	Actinobacillus pleuropneumoniae	715	Actinobacillus	pleuropneumoniae
GCF_000817465.1	Actinobacillus pleuropneumoniae	Actinobacillus	713	Actinobacillus pleuropneumoniae	715	Actinobacillus	pleuropneumoniae
GCF_000817515.1	Actinobacillus pleuropneumoniae	Actinobacillus	713	Actinobacillus pleuropneumoniae	715	Actinobacillus	pleuropneumoniae
GCF_000178615.1	Actinobacillus pleuropneumoniae	Actinobacillus	713	Actinobacillus pleuropneumoniae	715	Actinobacillus	pleuropneumoniae
GCF_000817485.1	Actinobacillus pleuropneumoniae	Actinobacillus	713	Actinobacillus pleuropneumoniae	715	Actinobacillus	pleuropneumoniae
GCF_000179275.1	Actinobacillus pleuropneumoniae	Actinobacillus	713	Actinobacillus pleuropneumoniae	715	Actinobacillus	pleuropneumoniae
GCF_001460855.1	Actinobacillus pleuropneumoniae	Actinobacillus	713	Actinobacillus pleuropneumoniae	715	Actinobacillus	pleuropneumoniae
GCF_000178535.1	Actinobacillus pleuropneumoniae	Actinobacillus	713	Actinobacillus pleuropneumoniae	715	Actinobacillus	pleuropneumoniae
GCF_000817525.1	Actinobacillus pleuropneumoniae	Actinobacillus	713	Actinobacillus pleuropneumoniae	715	Actinobacillus	pleuropneumoniae
GCF_000178575.1	Actinobacillus pleuropneumoniae	Actinobacillus	713	Actinobacillus pleuropneumoniae	715	Actinobacillus	pleuropneumoniae
GCF_000016685.1	Actinobacillus pleuropneumoniae	Actinobacillus	713	Actinobacillus pleuropneumoniae	715	Actinobacillus	pleuropneumoniae
GCF_000817445.1	Actinobacillus pleuropneumoniae	Actinobacillus	713	Actinobacillus pleuropneumoniae	715	Actinobacillus	pleuropneumoniae
GCF_000015885.1	Actinobacillus pleuropneumoniae	Actinobacillus	713	Actinobacillus pleuropneumoniae	715	Actinobacillus	pleuropneumoniae
GCF_000178515.1	Actinobacillus pleuropneumoniae	Actinobacillus	713	Actinobacillus pleuropneumoniae	715	Actinobacillus	pleuropneumoniae
GCF_000817535.1	Actinobacillus pleuropneumoniae	Actinobacillus	713	Actinobacillus pleuropneumoniae	715	Actinobacillus	pleuropneumoniae
GCF_000307145.1	Actinobacillus suis	Actinobacillus	713	Actinobacillus suis	716	Actinobacillus	suis
GCF_000739435.1	Actinobacillus suis	Actinobacillus	713	Actinobacillus suis	716	Actinobacillus	suis
GCF_001457435.1	Actinobaculum massiliense	Actinobaculum	76833	Actinobaculum massiliense	202789	Actinobaculum	massiliense
GCF_000315465.1	Actinobaculum massiliense	Actinobaculum	76833	Actinobaculum massiliense	202789	Actinobaculum	massiliense
GCF_000466185.1	Actinomyces graevenitzii	Actinomyces	1654	Actinomyces graevenitzii	55565	Actinomyces	graevenitzii
GCF_000239695.1	Actinomyces graevenitzii	Actinomyces	1654	Actinomyces graevenitzii	55565	Actinomyces	graevenitzii
GCF_000466245.1	Actinomyces johnsonii	Actinomyces	1654	Actinomyces johnsonii	544581	Actinomyces	johnsonii
GCF_000466205.2	Actinomyces johnsonii	Actinomyces	1654	Actinomyces johnsonii	544581	Actinomyces	johnsonii
GCF_000296275.1	Actinomyces massiliensis	Actinomyces	1654	Actinomyces massiliensis	461393	Actinomyces	massiliensis
GCF_000269805.1	Actinomyces massiliensis	Actinomyces	1654	Actinomyces massiliensis	461393	Actinomyces	massiliensis
GCF_001553935.1	Actinomyces oris	Actinomyces	1654	Actinomyces oris	544580	Actinomyces	oris
GCF_000180155.1	Actinomyces oris	Actinomyces	1654	Actinomyces oris	544580	Actinomyces	oris
GCF_000159035.1	Actinomyces urogenitalis	Actinomyces	1654	Actinomyces urogenitalis	103621	Actinomyces	urogenitalis
GCF_000758745.1	Actinomyces urogenitalis	Actinomyces	1654	Actinomyces urogenitalis	103621	Actinomyces	urogenitalis
GCF_000724605.1	Actinotignum schaalii	Actinotignum	1653174	Actinotignum schaalii	59505	Actinotignum	schaalii
GCF_000429205.1	Actinotignum schaalii	Actinotignum	1653174	Actinotignum schaalii	59505	Actinotignum	schaalii
GCF_001552755.1	Aerococcus christensenii	Aerococcus	1375	Aerococcus christensenii	87541	Aerococcus	christensenii
GCF_001466745.1	Aerococcus christensenii	Aerococcus	1375	Aerococcus christensenii	87541	Aerococcus	christensenii
GCF_001543105.1	Aerococcus christensenii	Aerococcus	1375	Aerococcus christensenii	87541	Aerococcus	christensenii
GCF_001544335.1	Aerococcus urinae	Aerococcus	1375	Aerococcus urinae	1376	Aerococcus	urinae
GCF_001543175.1	Aerococcus urinae	Aerococcus	1375	Aerococcus urinae	1376	Aerococcus	urinae
GCF_001518795.1	Aerococcus urinaeequi	Aerococcus	1375	Aerococcus urinaeequi	51665	Aerococcus	urinaeequi
GCF_000425085.1	Aerococcus urinaeequi	Aerococcus	1375	Aerococcus urinaeequi	51665	Aerococcus	urinaeequi
GCF_001543205.1	Aerococcus urinaeequi	Aerococcus	1375	Aerococcus urinaeequi	51665	Aerococcus	urinaeequi
GCF_001543285.1	Aerococcus viridans	Aerococcus	1375	Aerococcus viridans	1377	Aerococcus	viridans
GCF_000178435.1	Aerococcus viridans	Aerococcus	1375	Aerococcus viridans	1377	Aerococcus	viridans
GCF_001446895.1	Aeromonas allosaccharophila	Aeromonas	642	Aeromonas allosaccharophila	656	Aeromonas	allosaccharophila
GCF_000820245.1	Aeromonas allosaccharophila	Aeromonas	642	Aeromonas allosaccharophila	656	Aeromonas	allosaccharophila
GCF_000819685.1	Aeromonas allosaccharophila	Aeromonas	642	Aeromonas allosaccharophila	656	Aeromonas	allosaccharophila
GCF_000819785.1	Aeromonas caviae	Aeromonas	642	Aeromonas caviae	648	Aeromonas	caviae
GCF_000721855.1	Aeromonas caviae	Aeromonas	642	Aeromonas caviae	648	Aeromonas	caviae
GCF_000208825.1	Aeromonas caviae	Aeromonas	642	Aeromonas caviae	648	Aeromonas	caviae
GCF_001270765.1	Aeromonas caviae	Aeromonas	642	Aeromonas caviae	648	Aeromonas	caviae
GCF_000813475.1	Aeromonas caviae	Aeromonas	642	Aeromonas caviae	648	Aeromonas	caviae
GCF_000959705.1	Aeromonas caviae	Aeromonas	642	Aeromonas caviae	648	Aeromonas	caviae
GCF_000820265.1	Aeromonas caviae	Aeromonas	642	Aeromonas caviae	648	Aeromonas	caviae
GCF_000783715.1	Aeromonas caviae	Aeromonas	642	Aeromonas caviae	648	Aeromonas	caviae
GCF_001183595.1	Aeromonas caviae	Aeromonas	642	Aeromonas caviae	648	Aeromonas	caviae
GCF_000708085.1	Aeromonas dhakensis	Aeromonas	642	Aeromonas dhakensis	196024	Aeromonas	dhakensis
GCF_000298055.1	Aeromonas dhakensis	Aeromonas	642	Aeromonas dhakensis	196024	Aeromonas	dhakensis
GCF_000819805.1	Aeromonas diversa	Aeromonas	642	Aeromonas diversa	502790	Aeromonas	diversa
GCF_000367845.1	Aeromonas diversa	Aeromonas	642	Aeromonas diversa	502790	Aeromonas	diversa
GCF_000819845.1	Aeromonas enteropelogenes	Aeromonas	642	Aeromonas enteropelogenes	29489	Aeromonas	enteropelogenes
GCF_000687355.2	Aeromonas enteropelogenes	Aeromonas	642	Aeromonas enteropelogenes	29489	Aeromonas	enteropelogenes
GCF_000820205.1	Aeromonas enteropelogenes	Aeromonas	642	Aeromonas enteropelogenes	29489	Aeromonas	enteropelogenes
GCF_000626755.1	Aeromonas hydrophila	Aeromonas	642	Aeromonas hydrophila	644	Aeromonas	hydrophila
GCF_001535585.1	Aeromonas hydrophila	Aeromonas	642	Aeromonas hydrophila	644	Aeromonas	hydrophila
GCF_000315835.1	Aeromonas hydrophila	Aeromonas	642	Aeromonas hydrophila	644	Aeromonas	hydrophila
GCF_001604905.1	Aeromonas hydrophila	Aeromonas	642	Aeromonas hydrophila	644	Aeromonas	hydrophila
GCF_001019645.1	Aeromonas hydrophila	Aeromonas	642	Aeromonas hydrophila	644	Aeromonas	hydrophila
GCF_000401555.1	Aeromonas hydrophila	Aeromonas	642	Aeromonas hydrophila	644	Aeromonas	hydrophila
GCF_001604835.1	Aeromonas hydrophila	Aeromonas	642	Aeromonas hydrophila	644	Aeromonas	hydrophila
GCF_001518775.1	Aeromonas hydrophila	Aeromonas	642	Aeromonas hydrophila	644	Aeromonas	hydrophila
GCF_000803185.1	Aeromonas hydrophila	Aeromonas	642	Aeromonas hydrophila	644	Aeromonas	hydrophila
GCF_000963645.1	Aeromonas hydrophila	Aeromonas	642	Aeromonas hydrophila	644	Aeromonas	hydrophila
GCF_000698205.1	Aeromonas hydrophila	Aeromonas	642	Aeromonas hydrophila	644	Aeromonas	hydrophila
GCF_001604855.1	Aeromonas hydrophila	Aeromonas	642	Aeromonas hydrophila	644	Aeromonas	hydrophila
GCF_001455365.1	Aeromonas hydrophila	Aeromonas	642	Aeromonas hydrophila	644	Aeromonas	hydrophila
GCF_000708065.1	Aeromonas hydrophila	Aeromonas	642	Aeromonas hydrophila	644	Aeromonas	hydrophila
GCF_000940915.1	Aeromonas hydrophila	Aeromonas	642	Aeromonas hydrophila	644	Aeromonas	hydrophila
GCF_000633175.1	Aeromonas hydrophila	Aeromonas	642	Aeromonas hydrophila	644	Aeromonas	hydrophila
GCF_000820325.1	Aeromonas hydrophila	Aeromonas	642	Aeromonas hydrophila	644	Aeromonas	hydrophila
GCF_000635955.1	Aeromonas hydrophila	Aeromonas	642	Aeromonas hydrophila	644	Aeromonas	hydrophila
GCF_000708105.1	Aeromonas hydrophila	Aeromonas	642	Aeromonas hydrophila	644	Aeromonas	hydrophila
GCF_001055195.1	Aeromonas hydrophila	Aeromonas	642	Aeromonas hydrophila	644	Aeromonas	hydrophila
GCF_000819505.1	Aeromonas hydrophila	Aeromonas	642	Aeromonas hydrophila	644	Aeromonas	hydrophila
GCF_001057115.1	Aeromonas hydrophila	Aeromonas	642	Aeromonas hydrophila	644	Aeromonas	hydrophila
GCF_000014805.1	Aeromonas hydrophila	Aeromonas	642	Aeromonas hydrophila	644	Aeromonas	hydrophila
GCF_001055245.1	Aeromonas hydrophila	Aeromonas	642	Aeromonas hydrophila	644	Aeromonas	hydrophila
GCF_000786315.1	Aeromonas hydrophila	Aeromonas	642	Aeromonas hydrophila	644	Aeromonas	hydrophila
GCF_000724965.1	Aeromonas hydrophila	Aeromonas	642	Aeromonas hydrophila	644	Aeromonas	hydrophila
GCF_001604895.1	Aeromonas hydrophila	Aeromonas	642	Aeromonas hydrophila	644	Aeromonas	hydrophila
GCF_001056955.1	Aeromonas hydrophila	Aeromonas	642	Aeromonas hydrophila	644	Aeromonas	hydrophila
GCF_000708125.1	Aeromonas jandaei	Aeromonas	642	Aeromonas jandaei	650	Aeromonas	jandaei
GCF_000819955.1	Aeromonas jandaei	Aeromonas	642	Aeromonas jandaei	650	Aeromonas	jandaei
GCF_000754925.1	Aeromonas media	Aeromonas	642	Aeromonas media	651	Aeromonas	media
GCF_000287215.2	Aeromonas media	Aeromonas	642	Aeromonas media	651	Aeromonas	media
GCF_000819985.1	Aeromonas media	Aeromonas	642	Aeromonas media	651	Aeromonas	media
GCF_000754915.1	Aeromonas media	Aeromonas	642	Aeromonas media	651	Aeromonas	media
GCF_000931985.2	Aeromonas salmonicida	Aeromonas	642	Aeromonas salmonicida	645	Aeromonas	salmonicida
GCF_000647955.1	Aeromonas salmonicida	Aeromonas	642	Aeromonas salmonicida	645	Aeromonas	salmonicida
GCF_000786805.1	Aeromonas salmonicida	Aeromonas	642	Aeromonas salmonicida	645	Aeromonas	salmonicida
GCF_001466445.1	Aeromonas salmonicida	Aeromonas	642	Aeromonas salmonicida	645	Aeromonas	salmonicida
GCF_000786795.1	Aeromonas salmonicida	Aeromonas	642	Aeromonas salmonicida	645	Aeromonas	salmonicida
GCF_000820065.1	Aeromonas salmonicida	Aeromonas	642	Aeromonas salmonicida	645	Aeromonas	salmonicida
GCF_000196395.1	Aeromonas salmonicida	Aeromonas	642	Aeromonas salmonicida	645	Aeromonas	salmonicida
GCF_000447435.2	Aeromonas salmonicida	Aeromonas	642	Aeromonas salmonicida	645	Aeromonas	salmonicida
GCF_000234845.1	Aeromonas salmonicida	Aeromonas	642	Aeromonas salmonicida	645	Aeromonas	salmonicida
GCF_000315855.2	Aeromonas salmonicida	Aeromonas	642	Aeromonas salmonicida	645	Aeromonas	salmonicida
GCF_001466435.1	Aeromonas salmonicida	Aeromonas	642	Aeromonas salmonicida	645	Aeromonas	salmonicida
GCF_001447335.1	Aeromonas schubertii	Aeromonas	642	Aeromonas schubertii	652	Aeromonas	schubertii
GCF_001481395.1	Aeromonas schubertii	Aeromonas	642	Aeromonas schubertii	652	Aeromonas	schubertii
GCF_000820105.1	Aeromonas schubertii	Aeromonas	642	Aeromonas schubertii	652	Aeromonas	schubertii
GCF_000820165.1	Aeromonas taiwanensis	Aeromonas	642	Aeromonas taiwanensis	633417	Aeromonas	taiwanensis
GCF_000699185.1	Aeromonas taiwanensis	Aeromonas	642	Aeromonas taiwanensis	633417	Aeromonas	taiwanensis
GCF_000754905.1	Aeromonas veronii	Aeromonas	642	Aeromonas veronii	654	Aeromonas	veronii
GCF_001446635.1	Aeromonas veronii	Aeromonas	642	Aeromonas veronii	654	Aeromonas	veronii
GCF_000820285.1	Aeromonas veronii	Aeromonas	642	Aeromonas veronii	654	Aeromonas	veronii
GCF_000820365.1	Aeromonas veronii	Aeromonas	642	Aeromonas veronii	654	Aeromonas	veronii
GCF_000297975.1	Aeromonas veronii	Aeromonas	642	Aeromonas veronii	654	Aeromonas	veronii
GCF_001446535.1	Aeromonas veronii	Aeromonas	642	Aeromonas veronii	654	Aeromonas	veronii
GCF_000204115.1	Aeromonas veronii	Aeromonas	642	Aeromonas veronii	654	Aeromonas	veronii
GCF_000820385.1	Aeromonas veronii	Aeromonas	642	Aeromonas veronii	654	Aeromonas	veronii
GCF_001446875.1	Aeromonas veronii	Aeromonas	642	Aeromonas veronii	654	Aeromonas	veronii
GCF_001446555.1	Aeromonas veronii	Aeromonas	642	Aeromonas veronii	654	Aeromonas	veronii
GCF_001446505.1	Aeromonas veronii	Aeromonas	642	Aeromonas veronii	654	Aeromonas	veronii
GCF_001446775.1	Aeromonas veronii	Aeromonas	642	Aeromonas veronii	654	Aeromonas	veronii
GCF_000298035.1	Aeromonas veronii	Aeromonas	642	Aeromonas veronii	654	Aeromonas	veronii
GCF_001446835.1	Aeromonas veronii	Aeromonas	642	Aeromonas veronii	654	Aeromonas	veronii
GCF_001446695.1	Aeromonas veronii	Aeromonas	642	Aeromonas veronii	654	Aeromonas	veronii
GCF_000464515.1	Aeromonas veronii	Aeromonas	642	Aeromonas veronii	654	Aeromonas	veronii
GCF_001446675.1	Aeromonas veronii	Aeromonas	642	Aeromonas veronii	654	Aeromonas	veronii
GCF_000297995.1	Aeromonas veronii	Aeromonas	642	Aeromonas veronii	654	Aeromonas	veronii
GCF_001446755.1	Aeromonas veronii	Aeromonas	642	Aeromonas veronii	654	Aeromonas	veronii
GCF_001446735.1	Aeromonas veronii	Aeromonas	642	Aeromonas veronii	654	Aeromonas	veronii
GCF_000820225.1	Aeromonas veronii	Aeromonas	642	Aeromonas veronii	654	Aeromonas	veronii
GCF_001446795.1	Aeromonas veronii	Aeromonas	642	Aeromonas veronii	654	Aeromonas	veronii
GCF_001446575.1	Aeromonas veronii	Aeromonas	642	Aeromonas veronii	654	Aeromonas	veronii
GCF_001446465.1	Aeromonas veronii	Aeromonas	642	Aeromonas veronii	654	Aeromonas	veronii
GCF_001446645.1	Aeromonas veronii	Aeromonas	642	Aeromonas veronii	654	Aeromonas	veronii
GCF_001596425.1	Aggregatibacter actinomycetemcomitans	Aggregatibacter	416916	Aggregatibacter actinomycetemcomitans	714	Aggregatibacter	actinomycetemcomitans
GCF_000226855.2	Aggregatibacter actinomycetemcomitans	Aggregatibacter	416916	Aggregatibacter actinomycetemcomitans	714	Aggregatibacter	actinomycetemcomitans
GCF_000604045.1	Aggregatibacter actinomycetemcomitans	Aggregatibacter	416916	Aggregatibacter actinomycetemcomitans	714	Aggregatibacter	actinomycetemcomitans
GCF_001596245.1	Aggregatibacter actinomycetemcomitans	Aggregatibacter	416916	Aggregatibacter actinomycetemcomitans	714	Aggregatibacter	actinomycetemcomitans
GCF_000259915.1	Aggregatibacter actinomycetemcomitans	Aggregatibacter	416916	Aggregatibacter actinomycetemcomitans	714	Aggregatibacter	actinomycetemcomitans
GCF_001594265.1	Aggregatibacter actinomycetemcomitans	Aggregatibacter	416916	Aggregatibacter actinomycetemcomitans	714	Aggregatibacter	actinomycetemcomitans
GCF_001596225.1	Aggregatibacter actinomycetemcomitans	Aggregatibacter	416916	Aggregatibacter actinomycetemcomitans	714	Aggregatibacter	actinomycetemcomitans
GCF_000226815.2	Aggregatibacter actinomycetemcomitans	Aggregatibacter	416916	Aggregatibacter actinomycetemcomitans	714	Aggregatibacter	actinomycetemcomitans
GCF_000372365.1	Aggregatibacter actinomycetemcomitans	Aggregatibacter	416916	Aggregatibacter actinomycetemcomitans	714	Aggregatibacter	actinomycetemcomitans
GCF_000226795.2	Aggregatibacter actinomycetemcomitans	Aggregatibacter	416916	Aggregatibacter actinomycetemcomitans	714	Aggregatibacter	actinomycetemcomitans
GCF_000318155.1	Aggregatibacter actinomycetemcomitans	Aggregatibacter	416916	Aggregatibacter actinomycetemcomitans	714	Aggregatibacter	actinomycetemcomitans
GCF_001596335.1	Aggregatibacter actinomycetemcomitans	Aggregatibacter	416916	Aggregatibacter actinomycetemcomitans	714	Aggregatibacter	actinomycetemcomitans
GCF_001596305.1	Aggregatibacter actinomycetemcomitans	Aggregatibacter	416916	Aggregatibacter actinomycetemcomitans	714	Aggregatibacter	actinomycetemcomitans
GCF_001596415.1	Aggregatibacter actinomycetemcomitans	Aggregatibacter	416916	Aggregatibacter actinomycetemcomitans	714	Aggregatibacter	actinomycetemcomitans
GCF_000226715.2	Aggregatibacter actinomycetemcomitans	Aggregatibacter	416916	Aggregatibacter actinomycetemcomitans	714	Aggregatibacter	actinomycetemcomitans
GCF_001191585.1	Aggregatibacter actinomycetemcomitans	Aggregatibacter	416916	Aggregatibacter actinomycetemcomitans	714	Aggregatibacter	actinomycetemcomitans
GCF_001596325.1	Aggregatibacter actinomycetemcomitans	Aggregatibacter	416916	Aggregatibacter actinomycetemcomitans	714	Aggregatibacter	actinomycetemcomitans
GCF_000226835.2	Aggregatibacter actinomycetemcomitans	Aggregatibacter	416916	Aggregatibacter actinomycetemcomitans	714	Aggregatibacter	actinomycetemcomitans
GCF_000226775.2	Aggregatibacter actinomycetemcomitans	Aggregatibacter	416916	Aggregatibacter actinomycetemcomitans	714	Aggregatibacter	actinomycetemcomitans
GCF_000226755.1	Aggregatibacter actinomycetemcomitans	Aggregatibacter	416916	Aggregatibacter actinomycetemcomitans	714	Aggregatibacter	actinomycetemcomitans
GCF_000332895.2	Aggregatibacter actinomycetemcomitans	Aggregatibacter	416916	Aggregatibacter actinomycetemcomitans	714	Aggregatibacter	actinomycetemcomitans
GCF_000332955.2	Aggregatibacter actinomycetemcomitans	Aggregatibacter	416916	Aggregatibacter actinomycetemcomitans	714	Aggregatibacter	actinomycetemcomitans
GCF_001596255.1	Aggregatibacter actinomycetemcomitans	Aggregatibacter	416916	Aggregatibacter actinomycetemcomitans	714	Aggregatibacter	actinomycetemcomitans
GCF_001547775.1	Aggregatibacter actinomycetemcomitans	Aggregatibacter	416916	Aggregatibacter actinomycetemcomitans	714	Aggregatibacter	actinomycetemcomitans
GCF_000332935.2	Aggregatibacter actinomycetemcomitans	Aggregatibacter	416916	Aggregatibacter actinomycetemcomitans	714	Aggregatibacter	actinomycetemcomitans
GCF_000240985.2	Aggregatibacter actinomycetemcomitans	Aggregatibacter	416916	Aggregatibacter actinomycetemcomitans	714	Aggregatibacter	actinomycetemcomitans
GCF_001596235.1	Aggregatibacter actinomycetemcomitans	Aggregatibacter	416916	Aggregatibacter actinomycetemcomitans	714	Aggregatibacter	actinomycetemcomitans
GCF_001596385.1	Aggregatibacter actinomycetemcomitans	Aggregatibacter	416916	Aggregatibacter actinomycetemcomitans	714	Aggregatibacter	actinomycetemcomitans
GCF_000332915.2	Aggregatibacter actinomycetemcomitans	Aggregatibacter	416916	Aggregatibacter actinomycetemcomitans	714	Aggregatibacter	actinomycetemcomitans
GCF_000226735.2	Aggregatibacter actinomycetemcomitans	Aggregatibacter	416916	Aggregatibacter actinomycetemcomitans	714	Aggregatibacter	actinomycetemcomitans
GCF_001596315.1	Aggregatibacter actinomycetemcomitans	Aggregatibacter	416916	Aggregatibacter actinomycetemcomitans	714	Aggregatibacter	actinomycetemcomitans
GCF_000241025.1	Aggregatibacter actinomycetemcomitans	Aggregatibacter	416916	Aggregatibacter actinomycetemcomitans	714	Aggregatibacter	actinomycetemcomitans
GCF_000241005.2	Aggregatibacter actinomycetemcomitans	Aggregatibacter	416916	Aggregatibacter actinomycetemcomitans	714	Aggregatibacter	actinomycetemcomitans
GCF_001594245.1	Aggregatibacter actinomycetemcomitans	Aggregatibacter	416916	Aggregatibacter actinomycetemcomitans	714	Aggregatibacter	actinomycetemcomitans
GCF_001188835.1	Aggregatibacter aphrophilus	Aggregatibacter	416916	Aggregatibacter aphrophilus	732	Aggregatibacter	aphrophilus
GCF_001262035.1	Aggregatibacter aphrophilus	Aggregatibacter	416916	Aggregatibacter aphrophilus	732	Aggregatibacter	aphrophilus
GCF_000022985.1	Aggregatibacter aphrophilus	Aggregatibacter	416916	Aggregatibacter aphrophilus	732	Aggregatibacter	aphrophilus
GCF_000231255.1	Aggregatibacter aphrophilus	Aggregatibacter	416916	Aggregatibacter aphrophilus	732	Aggregatibacter	aphrophilus
GCF_001436375.1	Agrilactobacillus composti	Agrilactobacillus	2767875	Agrilactobacillus composti	398555	Agrilactobacillus	composti
GCF_000583695.1	Agrilactobacillus composti	Agrilactobacillus	2767875	Agrilactobacillus composti	398555	Agrilactobacillus	composti
GCF_000966435.1	Agrobacterium tumefaciens	Agrobacterium	357	Agrobacterium tumefaciens	358	Agrobacterium	tumefaciens
GCF_001551895.1	Agrobacterium tumefaciens	Agrobacterium	357	Agrobacterium tumefaciens	358	Agrobacterium	tumefaciens
GCF_000699125.1	Agrobacterium tumefaciens	Agrobacterium	357	Agrobacterium tumefaciens	358	Agrobacterium	tumefaciens
GCF_001541315.1	Agrobacterium tumefaciens	Agrobacterium	357	Agrobacterium tumefaciens	358	Agrobacterium	tumefaciens
GCF_000971565.1	Agrobacterium tumefaciens	Agrobacterium	357	Agrobacterium tumefaciens	358	Agrobacterium	tumefaciens
GCF_000730975.1	Agrobacterium tumefaciens	Agrobacterium	357	Agrobacterium tumefaciens	358	Agrobacterium	tumefaciens
GCF_001541305.1	Agrobacterium tumefaciens	Agrobacterium	357	Agrobacterium tumefaciens	358	Agrobacterium	tumefaciens
GCF_000421945.1	Agrobacterium tumefaciens	Agrobacterium	357	Agrobacterium tumefaciens	358	Agrobacterium	tumefaciens
GCF_000442985.1	Agrobacterium tumefaciens	Agrobacterium	357	Agrobacterium tumefaciens	358	Agrobacterium	tumefaciens
GCF_000236125.1	Agrobacterium tumefaciens	Agrobacterium	357	Agrobacterium tumefaciens	358	Agrobacterium	tumefaciens
GCF_000349865.1	Agrobacterium tumefaciens	Agrobacterium	357	Agrobacterium tumefaciens	358	Agrobacterium	tumefaciens
GCF_000439225.1	Agrobacterium tumefaciens	Agrobacterium	357	Agrobacterium tumefaciens	358	Agrobacterium	tumefaciens
GCF_000648215.1	Agrobacterium tumefaciens	Agrobacterium	357	Agrobacterium tumefaciens	358	Agrobacterium	tumefaciens
GCF_000233975.1	Agrobacterium tumefaciens	Agrobacterium	357	Agrobacterium tumefaciens	358	Agrobacterium	tumefaciens
GCF_000576515.1	Agrobacterium tumefaciens	Agrobacterium	357	Agrobacterium tumefaciens	358	Agrobacterium	tumefaciens
GCF_000723745.1	Akkermansia muciniphila	Akkermansia	239934	Akkermansia muciniphila	239935	Akkermansia	muciniphila
GCF_000020225.1	Akkermansia muciniphila	Akkermansia	239934	Akkermansia muciniphila	239935	Akkermansia	muciniphila
GCF_001516865.1	Alcaligenes faecalis	Alcaligenes	507	Alcaligenes faecalis	511	Alcaligenes	faecalis
GCF_000770015.1	Alcaligenes faecalis	Alcaligenes	507	Alcaligenes faecalis	511	Alcaligenes	faecalis
GCF_000739855.1	Alcaligenes faecalis	Alcaligenes	507	Alcaligenes faecalis	511	Alcaligenes	faecalis
GCF_000275465.1	Alcaligenes faecalis	Alcaligenes	507	Alcaligenes faecalis	511	Alcaligenes	faecalis
GCF_001530325.1	Alcaligenes faecalis	Alcaligenes	507	Alcaligenes faecalis	511	Alcaligenes	faecalis
GCF_000429385.1	Alcaligenes faecalis	Alcaligenes	507	Alcaligenes faecalis	511	Alcaligenes	faecalis
GCF_000967305.2	Alcaligenes faecalis	Alcaligenes	507	Alcaligenes faecalis	511	Alcaligenes	faecalis
GCF_000764755.1	Algibacter lectus	Algibacter	261827	Algibacter lectus	221126	Algibacter	lectus
GCF_000764835.1	Algibacter lectus	Algibacter	261827	Algibacter lectus	221126	Algibacter	lectus
GCF_000179015.2	Alicycliphilus denitrificans	Alicycliphilus	201096	Alicycliphilus denitrificans	179636	Alicycliphilus	denitrificans
GCF_000204645.1	Alicycliphilus denitrificans	Alicycliphilus	201096	Alicycliphilus denitrificans	179636	Alicycliphilus	denitrificans
GCF_001029395.1	Aliivibrio fischeri	Aliivibrio	511678	Aliivibrio fischeri	668	Aliivibrio	fischeri
GCF_000287175.1	Aliivibrio fischeri	Aliivibrio	511678	Aliivibrio fischeri	668	Aliivibrio	fischeri
GCF_000241785.1	Aliivibrio fischeri	Aliivibrio	511678	Aliivibrio fischeri	668	Aliivibrio	fischeri
GCF_000020845.1	Aliivibrio fischeri	Aliivibrio	511678	Aliivibrio fischeri	668	Aliivibrio	fischeri
GCF_000011805.1	Aliivibrio fischeri	Aliivibrio	511678	Aliivibrio fischeri	668	Aliivibrio	fischeri
GCF_001557835.1	Aliivibrio wodanis	Aliivibrio	511678	Aliivibrio wodanis	80852	Aliivibrio	wodanis
GCF_001557785.1	Aliivibrio wodanis	Aliivibrio	511678	Aliivibrio wodanis	80852	Aliivibrio	wodanis
GCF_001557865.1	Aliivibrio wodanis	Aliivibrio	511678	Aliivibrio wodanis	80852	Aliivibrio	wodanis
GCF_001557995.1	Aliivibrio wodanis	Aliivibrio	511678	Aliivibrio wodanis	80852	Aliivibrio	wodanis
GCF_001557935.1	Aliivibrio wodanis	Aliivibrio	511678	Aliivibrio wodanis	80852	Aliivibrio	wodanis
GCF_001557915.1	Aliivibrio wodanis	Aliivibrio	511678	Aliivibrio wodanis	80852	Aliivibrio	wodanis
GCF_000737305.2	Alkalihalobacillus clausii	Alkalihalobacillus	2675234	Alkalihalobacillus clausii	79880	Alkalihalobacillus	clausii
GCF_000009825.1	Alkalihalobacillus clausii	Alkalihalobacillus	2675234	Alkalihalobacillus clausii	79880	Alkalihalobacillus	clausii
GCF_001592025.1	Alkalihalobacillus trypoxylicola	Alkalihalobacillus	2675234	Alkalihalobacillus trypoxylicola	519424	Alkalihalobacillus	trypoxylicola
GCF_001590785.1	Alkalihalobacillus trypoxylicola	Alkalihalobacillus	2675234	Alkalihalobacillus trypoxylicola	519424	Alkalihalobacillus	trypoxylicola
GCF_001028625.1	Altererythrobacter marensis	Altererythrobacter	361177	Altererythrobacter marensis	543877	Altererythrobacter	marensis
GCF_001461885.1	Altererythrobacter marensis	Altererythrobacter	361177	Altererythrobacter marensis	543877	Altererythrobacter	marensis
GCF_000934525.1	Alteromonas australica	Alteromonas	226	Alteromonas australica	589873	Alteromonas	australica
GCF_000730385.1	Alteromonas australica	Alteromonas	226	Alteromonas australica	589873	Alteromonas	australica
GCF_000172635.2	Alteromonas macleodii	Alteromonas	226	Alteromonas macleodii	28108	Alteromonas	macleodii
GCF_000808635.1	Alteromonas macleodii	Alteromonas	226	Alteromonas macleodii	28108	Alteromonas	macleodii
GCF_001562235.1	Alteromonas macleodii	Alteromonas	226	Alteromonas macleodii	28108	Alteromonas	macleodii
GCF_000300175.1	Alteromonas macleodii	Alteromonas	226	Alteromonas macleodii	28108	Alteromonas	macleodii
GCF_000299955.1	Alteromonas macleodii	Alteromonas	226	Alteromonas macleodii	28108	Alteromonas	macleodii
GCF_000808595.1	Alteromonas macleodii	Alteromonas	226	Alteromonas macleodii	28108	Alteromonas	macleodii
GCF_001077695.1	Alteromonas macleodii	Alteromonas	226	Alteromonas macleodii	28108	Alteromonas	macleodii
GCF_001578515.1	Alteromonas macleodii	Alteromonas	226	Alteromonas macleodii	28108	Alteromonas	macleodii
GCF_000020585.3	Alteromonas mediterranea	Alteromonas	226	Alteromonas mediterranea	314275	Alteromonas	mediterranea
GCF_000439595.1	Alteromonas mediterranea	Alteromonas	226	Alteromonas mediterranea	314275	Alteromonas	mediterranea
GCF_000439535.1	Alteromonas mediterranea	Alteromonas	226	Alteromonas mediterranea	314275	Alteromonas	mediterranea
GCF_000439555.1	Alteromonas mediterranea	Alteromonas	226	Alteromonas mediterranea	314275	Alteromonas	mediterranea
GCF_001562315.1	Alteromonas mediterranea	Alteromonas	226	Alteromonas mediterranea	314275	Alteromonas	mediterranea
GCF_000439495.1	Alteromonas mediterranea	Alteromonas	226	Alteromonas mediterranea	314275	Alteromonas	mediterranea
GCF_000310085.1	Alteromonas mediterranea	Alteromonas	226	Alteromonas mediterranea	314275	Alteromonas	mediterranea
GCF_000439575.1	Alteromonas mediterranea	Alteromonas	226	Alteromonas mediterranea	314275	Alteromonas	mediterranea
GCF_001632765.1	Alteromonas stellipolaris	Alteromonas	226	Alteromonas stellipolaris	233316	Alteromonas	stellipolaris
GCF_001562115.1	Alteromonas stellipolaris	Alteromonas	226	Alteromonas stellipolaris	233316	Alteromonas	stellipolaris
GCF_001632825.1	Alteromonas stellipolaris	Alteromonas	226	Alteromonas stellipolaris	233316	Alteromonas	stellipolaris
GCF_001433715.1	Alteromonas stellipolaris	Alteromonas	226	Alteromonas stellipolaris	233316	Alteromonas	stellipolaris
GCF_000282715.1	Amycolatopsis mediterranei	Amycolatopsis	1813	Amycolatopsis mediterranei	33910	Amycolatopsis	mediterranei
GCF_000454025.1	Amycolatopsis mediterranei	Amycolatopsis	1813	Amycolatopsis mediterranei	33910	Amycolatopsis	mediterranei
GCF_000220945.1	Amycolatopsis mediterranei	Amycolatopsis	1813	Amycolatopsis mediterranei	33910	Amycolatopsis	mediterranei
GCF_000196835.1	Amycolatopsis mediterranei	Amycolatopsis	1813	Amycolatopsis mediterranei	33910	Amycolatopsis	mediterranei
GCF_000696405.1	Amycolatopsis mediterranei	Amycolatopsis	1813	Amycolatopsis mediterranei	33910	Amycolatopsis	mediterranei
GCF_000700945.1	Amycolatopsis mediterranei	Amycolatopsis	1813	Amycolatopsis mediterranei	33910	Amycolatopsis	mediterranei
GCF_000739085.1	Amycolatopsis methanolica	Amycolatopsis	1813	Amycolatopsis methanolica	1814	Amycolatopsis	methanolica
GCF_000371885.1	Amycolatopsis methanolica	Amycolatopsis	1813	Amycolatopsis methanolica	1814	Amycolatopsis	methanolica
GCF_001613935.1	Amycolatopsis regifaucium	Amycolatopsis	1813	Amycolatopsis regifaucium	546365	Amycolatopsis	regifaucium
GCF_001558125.1	Amycolatopsis regifaucium	Amycolatopsis	1813	Amycolatopsis regifaucium	546365	Amycolatopsis	regifaucium
GCF_000388135.1	Amycolatopsis vancoresmycina	Amycolatopsis	1813	Amycolatopsis vancoresmycina	208444	Amycolatopsis	vancoresmycina
GCF_000716785.1	Amycolatopsis vancoresmycina	Amycolatopsis	1813	Amycolatopsis vancoresmycina	208444	Amycolatopsis	vancoresmycina
GCF_000173355.1	Anaerococcus hydrogenalis	Anaerococcus	165779	Anaerococcus hydrogenalis	33029	Anaerococcus	hydrogenalis
GCF_000191745.1	Anaerococcus hydrogenalis	Anaerococcus	165779	Anaerococcus hydrogenalis	33029	Anaerococcus	hydrogenalis
GCF_000758765.1	Anaerococcus lactolyticus	Anaerococcus	165779	Anaerococcus lactolyticus	33032	Anaerococcus	lactolyticus
GCF_000156575.1	Anaerococcus lactolyticus	Anaerococcus	165779	Anaerococcus lactolyticus	33032	Anaerococcus	lactolyticus
GCF_000159095.1	Anaerococcus tetradius	Anaerococcus	165779	Anaerococcus tetradius	33036	Anaerococcus	tetradius
GCF_001546165.1	Anaerococcus tetradius	Anaerococcus	165779	Anaerococcus tetradius	33036	Anaerococcus	tetradius
GCF_000876135.1	Anaerostipes hadrus	Anaerostipes	207244	Anaerostipes hadrus	649756	Anaerostipes	hadrus
GCF_000332875.2	Anaerostipes hadrus	Anaerostipes	207244	Anaerostipes hadrus	649756	Anaerostipes	hadrus
GCF_000011945.1	Anaplasma marginale	Anaplasma	768	Anaplasma marginale	770	Anaplasma	marginale
GCF_000495535.1	Anaplasma marginale	Anaplasma	768	Anaplasma marginale	770	Anaplasma	marginale
GCF_000495495.1	Anaplasma marginale	Anaplasma	768	Anaplasma marginale	770	Anaplasma	marginale
GCF_000020305.1	Anaplasma marginale	Anaplasma	768	Anaplasma marginale	770	Anaplasma	marginale
GCF_000215585.1	Anaplasma marginale	Anaplasma	768	Anaplasma marginale	770	Anaplasma	marginale
GCF_000172495.1	Anaplasma marginale	Anaplasma	768	Anaplasma marginale	770	Anaplasma	marginale
GCF_000215525.1	Anaplasma marginale	Anaplasma	768	Anaplasma marginale	770	Anaplasma	marginale
GCF_000215605.1	Anaplasma marginale	Anaplasma	768	Anaplasma marginale	770	Anaplasma	marginale
GCF_000215565.1	Anaplasma marginale	Anaplasma	768	Anaplasma marginale	770	Anaplasma	marginale
GCF_000172515.1	Anaplasma marginale	Anaplasma	768	Anaplasma marginale	770	Anaplasma	marginale
GCF_000172475.1	Anaplasma marginale	Anaplasma	768	Anaplasma marginale	770	Anaplasma	marginale
GCF_000215545.1	Anaplasma marginale	Anaplasma	768	Anaplasma marginale	770	Anaplasma	marginale
GCF_000215485.1	Anaplasma marginale	Anaplasma	768	Anaplasma marginale	770	Anaplasma	marginale
GCF_000215505.1	Anaplasma marginale	Anaplasma	768	Anaplasma marginale	770	Anaplasma	marginale
GCF_900000025.1	Anaplasma phagocytophilum	Anaplasma	768	Anaplasma phagocytophilum	948	Anaplasma	phagocytophilum
GCF_000478425.1	Anaplasma phagocytophilum	Anaplasma	768	Anaplasma phagocytophilum	948	Anaplasma	phagocytophilum
GCF_000964725.1	Anaplasma phagocytophilum	Anaplasma	768	Anaplasma phagocytophilum	948	Anaplasma	phagocytophilum
GCF_000965125.1	Anaplasma phagocytophilum	Anaplasma	768	Anaplasma phagocytophilum	948	Anaplasma	phagocytophilum
GCF_000964985.1	Anaplasma phagocytophilum	Anaplasma	768	Anaplasma phagocytophilum	948	Anaplasma	phagocytophilum
GCF_000964785.1	Anaplasma phagocytophilum	Anaplasma	768	Anaplasma phagocytophilum	948	Anaplasma	phagocytophilum
GCF_000439795.1	Anaplasma phagocytophilum	Anaplasma	768	Anaplasma phagocytophilum	948	Anaplasma	phagocytophilum
GCF_000968465.1	Anaplasma phagocytophilum	Anaplasma	768	Anaplasma phagocytophilum	948	Anaplasma	phagocytophilum
GCF_000689655.1	Anaplasma phagocytophilum	Anaplasma	768	Anaplasma phagocytophilum	948	Anaplasma	phagocytophilum
GCF_000968455.1	Anaplasma phagocytophilum	Anaplasma	768	Anaplasma phagocytophilum	948	Anaplasma	phagocytophilum
GCF_000689615.1	Anaplasma phagocytophilum	Anaplasma	768	Anaplasma phagocytophilum	948	Anaplasma	phagocytophilum
GCF_000013125.1	Anaplasma phagocytophilum	Anaplasma	768	Anaplasma phagocytophilum	948	Anaplasma	phagocytophilum
GCF_000964935.1	Anaplasma phagocytophilum	Anaplasma	768	Anaplasma phagocytophilum	948	Anaplasma	phagocytophilum
GCF_000478445.1	Anaplasma phagocytophilum	Anaplasma	768	Anaplasma phagocytophilum	948	Anaplasma	phagocytophilum
GCF_000439775.1	Anaplasma phagocytophilum	Anaplasma	768	Anaplasma phagocytophilum	948	Anaplasma	phagocytophilum
GCF_000689635.2	Anaplasma phagocytophilum	Anaplasma	768	Anaplasma phagocytophilum	948	Anaplasma	phagocytophilum
GCF_000964915.1	Anaplasma phagocytophilum	Anaplasma	768	Anaplasma phagocytophilum	948	Anaplasma	phagocytophilum
GCF_000964945.1	Anaplasma phagocytophilum	Anaplasma	768	Anaplasma phagocytophilum	948	Anaplasma	phagocytophilum
GCF_000964745.1	Anaplasma phagocytophilum	Anaplasma	768	Anaplasma phagocytophilum	948	Anaplasma	phagocytophilum
GCF_000878885.1	Aneurinibacillus migulanus	Aneurinibacillus	55079	Aneurinibacillus migulanus	47500	Aneurinibacillus	migulanus
GCF_001274715.1	Aneurinibacillus migulanus	Aneurinibacillus	55079	Aneurinibacillus migulanus	47500	Aneurinibacillus	migulanus
GCF_001282905.1	Aneurinibacillus migulanus	Aneurinibacillus	55079	Aneurinibacillus migulanus	47500	Aneurinibacillus	migulanus
GCF_001294525.1	Aneurinibacillus migulanus	Aneurinibacillus	55079	Aneurinibacillus migulanus	47500	Aneurinibacillus	migulanus
GCF_000878905.1	Aneurinibacillus migulanus	Aneurinibacillus	55079	Aneurinibacillus migulanus	47500	Aneurinibacillus	migulanus
GCF_000770375.1	Anoxybacillus gonensis	Anoxybacillus	150247	Anoxybacillus gonensis	198467	Anoxybacillus	gonensis
GCF_001187595.1	Anoxybacillus gonensis	Anoxybacillus	150247	Anoxybacillus gonensis	198467	Anoxybacillus	gonensis
GCF_000789435.1	Aphanizomenon flos-aquae	Aphanizomenon	1175	Aphanizomenon flos-aquae	1176	Aphanizomenon	flos-aquae
GCF_000521175.1	Aphanizomenon flos-aquae	Aphanizomenon	1175	Aphanizomenon flos-aquae	1176	Aphanizomenon	flos-aquae
GCF_001281225.1	Lactobacillus kunkeei	Apilactobacillus	2767877	Lactobacillus kunkeei	148814	Apilactobacillus	Lactobacillus kunkeei
GCF_001308185.1	Lactobacillus kunkeei	Apilactobacillus	2767877	Lactobacillus kunkeei	148814	Apilactobacillus	Lactobacillus kunkeei
GCF_001281215.1	Lactobacillus kunkeei	Apilactobacillus	2767877	Lactobacillus kunkeei	148814	Apilactobacillus	Lactobacillus kunkeei
GCF_001314945.1	Lactobacillus kunkeei	Apilactobacillus	2767877	Lactobacillus kunkeei	148814	Apilactobacillus	Lactobacillus kunkeei
GCF_001281285.1	Lactobacillus kunkeei	Apilactobacillus	2767877	Lactobacillus kunkeei	148814	Apilactobacillus	Lactobacillus kunkeei
GCF_001433825.1	Lactobacillus kunkeei	Apilactobacillus	2767877	Lactobacillus kunkeei	148814	Apilactobacillus	Lactobacillus kunkeei
GCF_000830375.1	Lactobacillus kunkeei	Apilactobacillus	2767877	Lactobacillus kunkeei	148814	Apilactobacillus	Lactobacillus kunkeei
GCF_001421135.1	Lactobacillus kunkeei	Apilactobacillus	2767877	Lactobacillus kunkeei	148814	Apilactobacillus	Lactobacillus kunkeei
GCF_001281265.1	Lactobacillus kunkeei	Apilactobacillus	2767877	Lactobacillus kunkeei	148814	Apilactobacillus	Lactobacillus kunkeei
GCF_001421115.1	Lactobacillus kunkeei	Apilactobacillus	2767877	Lactobacillus kunkeei	148814	Apilactobacillus	Lactobacillus kunkeei
GCF_001281165.1	Lactobacillus kunkeei	Apilactobacillus	2767877	Lactobacillus kunkeei	148814	Apilactobacillus	Lactobacillus kunkeei
GCF_001281205.1	Lactobacillus kunkeei	Apilactobacillus	2767877	Lactobacillus kunkeei	148814	Apilactobacillus	Lactobacillus kunkeei
GCF_000687335.1	Lactobacillus kunkeei	Apilactobacillus	2767877	Lactobacillus kunkeei	148814	Apilactobacillus	Lactobacillus kunkeei
GCF_000741865.1	Lactobacillus kunkeei	Apilactobacillus	2767877	Lactobacillus kunkeei	148814	Apilactobacillus	Lactobacillus kunkeei
GCF_001308215.1	Lactobacillus kunkeei	Apilactobacillus	2767877	Lactobacillus kunkeei	148814	Apilactobacillus	Lactobacillus kunkeei
GCF_001308195.1	Lactobacillus kunkeei	Apilactobacillus	2767877	Lactobacillus kunkeei	148814	Apilactobacillus	Lactobacillus kunkeei
GCF_001010695.1	Arcobacter butzleri	Arcobacter	28196	Arcobacter butzleri	28197	Arcobacter	butzleri
GCF_001010595.1	Arcobacter butzleri	Arcobacter	28196	Arcobacter butzleri	28197	Arcobacter	butzleri
GCF_000284355.1	Arcobacter butzleri	Arcobacter	28196	Arcobacter butzleri	28197	Arcobacter	butzleri
GCF_000215345.2	Arcobacter butzleri	Arcobacter	28196	Arcobacter butzleri	28197	Arcobacter	butzleri
GCF_001010665.1	Arcobacter butzleri	Arcobacter	28196	Arcobacter butzleri	28197	Arcobacter	butzleri
GCF_001010585.1	Arcobacter butzleri	Arcobacter	28196	Arcobacter butzleri	28197	Arcobacter	butzleri
GCF_001010675.1	Arcobacter butzleri	Arcobacter	28196	Arcobacter butzleri	28197	Arcobacter	butzleri
GCF_001010715.1	Arcobacter butzleri	Arcobacter	28196	Arcobacter butzleri	28197	Arcobacter	butzleri
GCF_001010605.1	Arcobacter butzleri	Arcobacter	28196	Arcobacter butzleri	28197	Arcobacter	butzleri
GCF_001010615.1	Arcobacter butzleri	Arcobacter	28196	Arcobacter butzleri	28197	Arcobacter	butzleri
GCF_000014025.1	Arcobacter butzleri	Arcobacter	28196	Arcobacter butzleri	28197	Arcobacter	butzleri
GCF_000585115.1	Arcobacter lanthieri	Arcobacter	28196	Arcobacter lanthieri	1355374	Arcobacter	lanthieri
GCF_000585195.1	Arcobacter lanthieri	Arcobacter	28196	Arcobacter lanthieri	1355374	Arcobacter	lanthieri
GCF_001306175.1	Ardenticatena maritima	Ardenticatena	1382931	Ardenticatena maritima	872965	Ardenticatena	maritima
GCF_001293545.1	Ardenticatena maritima	Ardenticatena	1382931	Ardenticatena maritima	872965	Ardenticatena	maritima
GCF_000426365.1	Arenimonas composti	Arenimonas	490567	Arenimonas composti	370776	Arenimonas	composti
GCF_000747175.1	Arenimonas composti	Arenimonas	490567	Arenimonas composti	370776	Arenimonas	composti
GCF_000747135.1	Arenimonas oryziterrae	Arenimonas	490567	Arenimonas oryziterrae	498055	Arenimonas	oryziterrae
GCF_000420545.1	Arenimonas oryziterrae	Arenimonas	490567	Arenimonas oryziterrae	498055	Arenimonas	oryziterrae
GCF_000175415.3	Arthrospira platensis	Arthrospira	35823	Arthrospira platensis	118562	Arthrospira	platensis
GCF_000210375.1	Arthrospira platensis	Arthrospira	35823	Arthrospira platensis	118562	Arthrospira	platensis
GCF_001611905.1	Arthrospira platensis	Arthrospira	35823	Arthrospira platensis	118562	Arthrospira	platensis
GCF_000376105.1	Asticcacaulis benevestitus	Asticcacaulis	76890	Asticcacaulis benevestitus	347481	Asticcacaulis	benevestitus
GCF_000495775.1	Asticcacaulis benevestitus	Asticcacaulis	76890	Asticcacaulis benevestitus	347481	Asticcacaulis	benevestitus
GCF_000364325.1	Atopobium minutum	Atopobium	1380	Atopobium minutum	1381	Atopobium	minutum
GCF_001437015.1	Atopobium minutum	Atopobium	1380	Atopobium minutum	1381	Atopobium	minutum
GCF_001463825.1	Aurantimonas coralicida	Aurantimonas	182269	Aurantimonas coralicida	182270	Aurantimonas	coralicida
GCF_000421645.1	Aurantimonas coralicida	Aurantimonas	182269	Aurantimonas coralicida	182270	Aurantimonas	coralicida
GCF_000153465.1	Aurantimonas manganoxydans	Aurantimonas	182269	Aurantimonas manganoxydans	651183	Aurantimonas	manganoxydans
GCF_001463865.1	Aurantimonas manganoxydans	Aurantimonas	182269	Aurantimonas manganoxydans	651183	Aurantimonas	manganoxydans
GCF_001475935.1	Aureimonas ureilytica	Aureimonas	414371	Aureimonas ureilytica	401562	Aureimonas	ureilytica
GCF_000382705.1	Aureimonas ureilytica	Aureimonas	414371	Aureimonas ureilytica	401562	Aureimonas	ureilytica
GCF_001475555.1	Aureimonas ureilytica	Aureimonas	414371	Aureimonas ureilytica	401562	Aureimonas	ureilytica
GCF_001463945.1	Aureimonas ureilytica	Aureimonas	414371	Aureimonas ureilytica	401562	Aureimonas	ureilytica
GCF_000442905.1	Avibacterium paragallinarum	Avibacterium	292486	Avibacterium paragallinarum	728	Avibacterium	paragallinarum
GCF_000221945.2	Avibacterium paragallinarum	Avibacterium	292486	Avibacterium paragallinarum	728	Avibacterium	paragallinarum
GCF_000969315.1	Avibacterium paragallinarum	Avibacterium	292486	Avibacterium paragallinarum	728	Avibacterium	paragallinarum
GCF_000969305.1	Avibacterium paragallinarum	Avibacterium	292486	Avibacterium paragallinarum	728	Avibacterium	paragallinarum
GCF_000348525.1	Avibacterium paragallinarum	Avibacterium	292486	Avibacterium paragallinarum	728	Avibacterium	paragallinarum
GCF_000404045.1	Azospirillum brasilense	Azospirillum	191	Azospirillum brasilense	192	Azospirillum	brasilense
GCF_001315015.1	Azospirillum brasilense	Azospirillum	191	Azospirillum brasilense	192	Azospirillum	brasilense
GCF_000632475.1	Azospirillum brasilense	Azospirillum	191	Azospirillum brasilense	192	Azospirillum	brasilense
GCF_001305595.1	Azospirillum thiophilum	Azospirillum	191	Azospirillum thiophilum	528244	Azospirillum	thiophilum
GCF_000960825.1	Azospirillum thiophilum	Azospirillum	191	Azospirillum thiophilum	528244	Azospirillum	thiophilum
GCF_000380365.1	Azotobacter vinelandii	Azotobacter	352	Azotobacter vinelandii	354	Azotobacter	vinelandii
GCF_000021045.1	Azotobacter vinelandii	Azotobacter	352	Azotobacter vinelandii	354	Azotobacter	vinelandii
GCF_000380335.1	Azotobacter vinelandii	Azotobacter	352	Azotobacter vinelandii	354	Azotobacter	vinelandii
GCF_001571105.1	Azotobacter vinelandii	Azotobacter	352	Azotobacter vinelandii	354	Azotobacter	vinelandii
GCF_001469685.1	Bacillus amyloliquefaciens	Bacillus	1386	Bacillus amyloliquefaciens	1390	Bacillus	amyloliquefaciens
GCF_000494835.1	Bacillus amyloliquefaciens	Bacillus	1386	Bacillus amyloliquefaciens	1390	Bacillus	amyloliquefaciens
GCF_000508265.1	Bacillus amyloliquefaciens	Bacillus	1386	Bacillus amyloliquefaciens	1390	Bacillus	amyloliquefaciens
GCF_000242855.2	Bacillus amyloliquefaciens	Bacillus	1386	Bacillus amyloliquefaciens	1390	Bacillus	amyloliquefaciens
GCF_000769515.1	Bacillus amyloliquefaciens	Bacillus	1386	Bacillus amyloliquefaciens	1390	Bacillus	amyloliquefaciens
GCF_000469015.1	Bacillus amyloliquefaciens	Bacillus	1386	Bacillus amyloliquefaciens	1390	Bacillus	amyloliquefaciens
GCF_001619745.1	Bacillus amyloliquefaciens	Bacillus	1386	Bacillus amyloliquefaciens	1390	Bacillus	amyloliquefaciens
GCF_000817575.1	Bacillus amyloliquefaciens	Bacillus	1386	Bacillus amyloliquefaciens	1390	Bacillus	amyloliquefaciens
GCF_001247635.1	Bacillus amyloliquefaciens	Bacillus	1386	Bacillus amyloliquefaciens	1390	Bacillus	amyloliquefaciens
GCF_001431285.1	Bacillus amyloliquefaciens	Bacillus	1386	Bacillus amyloliquefaciens	1390	Bacillus	amyloliquefaciens
GCF_001558705.1	Bacillus amyloliquefaciens	Bacillus	1386	Bacillus amyloliquefaciens	1390	Bacillus	amyloliquefaciens
GCF_000835145.1	Bacillus amyloliquefaciens	Bacillus	1386	Bacillus amyloliquefaciens	1390	Bacillus	amyloliquefaciens
GCF_000015785.1	Bacillus amyloliquefaciens	Bacillus	1386	Bacillus amyloliquefaciens	1390	Bacillus	amyloliquefaciens
GCF_000815275.1	Bacillus amyloliquefaciens	Bacillus	1386	Bacillus amyloliquefaciens	1390	Bacillus	amyloliquefaciens
GCF_001596755.1	Bacillus amyloliquefaciens	Bacillus	1386	Bacillus amyloliquefaciens	1390	Bacillus	amyloliquefaciens
GCF_000833005.1	Bacillus amyloliquefaciens	Bacillus	1386	Bacillus amyloliquefaciens	1390	Bacillus	amyloliquefaciens
GCF_000784675.1	Bacillus amyloliquefaciens	Bacillus	1386	Bacillus amyloliquefaciens	1390	Bacillus	amyloliquefaciens
GCF_000973485.1	Bacillus amyloliquefaciens	Bacillus	1386	Bacillus amyloliquefaciens	1390	Bacillus	amyloliquefaciens
GCF_001483885.1	Bacillus amyloliquefaciens	Bacillus	1386	Bacillus amyloliquefaciens	1390	Bacillus	amyloliquefaciens
GCF_000559145.1	Bacillus amyloliquefaciens	Bacillus	1386	Bacillus amyloliquefaciens	1390	Bacillus	amyloliquefaciens
GCF_000832725.1	Bacillus anthracis	Bacillus	1386	Bacillus anthracis	1392	Bacillus	anthracis
GCF_000181675.2	Bacillus anthracis	Bacillus	1386	Bacillus anthracis	1392	Bacillus	anthracis
GCF_001015005.1	Bacillus anthracis	Bacillus	1386	Bacillus anthracis	1392	Bacillus	anthracis
GCF_000181995.1	Bacillus anthracis	Bacillus	1386	Bacillus anthracis	1392	Bacillus	anthracis
GCF_000783015.1	Bacillus anthracis	Bacillus	1386	Bacillus anthracis	1392	Bacillus	anthracis
GCF_001276995.1	Bacillus anthracis	Bacillus	1386	Bacillus anthracis	1392	Bacillus	anthracis
GCF_000783165.1	Bacillus anthracis	Bacillus	1386	Bacillus anthracis	1392	Bacillus	anthracis
GCF_000782975.1	Bacillus anthracis	Bacillus	1386	Bacillus anthracis	1392	Bacillus	anthracis
GCF_000986935.1	Bacillus anthracis	Bacillus	1386	Bacillus anthracis	1392	Bacillus	anthracis
GCF_000742655.1	Bacillus anthracis	Bacillus	1386	Bacillus anthracis	1392	Bacillus	anthracis
GCF_000782875.1	Bacillus anthracis	Bacillus	1386	Bacillus anthracis	1392	Bacillus	anthracis
GCF_000743825.1	Bacillus anthracis	Bacillus	1386	Bacillus anthracis	1392	Bacillus	anthracis
GCF_000783095.1	Bacillus anthracis	Bacillus	1386	Bacillus anthracis	1392	Bacillus	anthracis
GCF_000167235.1	Bacillus anthracis	Bacillus	1386	Bacillus anthracis	1392	Bacillus	anthracis
GCF_000832965.1	Bacillus anthracis	Bacillus	1386	Bacillus anthracis	1392	Bacillus	anthracis
GCF_000832425.1	Bacillus anthracis	Bacillus	1386	Bacillus anthracis	1392	Bacillus	anthracis
GCF_000295695.1	Bacillus anthracis	Bacillus	1386	Bacillus anthracis	1392	Bacillus	anthracis
GCF_000697555.1	Bacillus anthracis	Bacillus	1386	Bacillus anthracis	1392	Bacillus	anthracis
GCF_000808075.1	Bacillus anthracis	Bacillus	1386	Bacillus anthracis	1392	Bacillus	anthracis
GCF_000008445.1	Bacillus anthracis	Bacillus	1386	Bacillus anthracis	1392	Bacillus	anthracis
GCF_000742875.1	Bacillus anthracis	Bacillus	1386	Bacillus anthracis	1392	Bacillus	anthracis
GCF_001273085.1	Bacillus anthracis	Bacillus	1386	Bacillus anthracis	1392	Bacillus	anthracis
GCF_000783035.1	Bacillus anthracis	Bacillus	1386	Bacillus anthracis	1392	Bacillus	anthracis
GCF_000782995.1	Bacillus anthracis	Bacillus	1386	Bacillus anthracis	1392	Bacillus	anthracis
GCF_000742895.1	Bacillus anthracis	Bacillus	1386	Bacillus anthracis	1392	Bacillus	anthracis
GCF_000831505.1	Bacillus anthracis	Bacillus	1386	Bacillus anthracis	1392	Bacillus	anthracis
GCF_001273025.1	Bacillus anthracis	Bacillus	1386	Bacillus anthracis	1392	Bacillus	anthracis
GCF_000832465.1	Bacillus anthracis	Bacillus	1386	Bacillus anthracis	1392	Bacillus	anthracis
GCF_000310045.1	Bacillus anthracis	Bacillus	1386	Bacillus anthracis	1392	Bacillus	anthracis
GCF_000167315.1	Bacillus anthracis	Bacillus	1386	Bacillus anthracis	1392	Bacillus	anthracis
GCF_000583105.1	Bacillus anthracis	Bacillus	1386	Bacillus anthracis	1392	Bacillus	anthracis
GCF_000697515.2	Bacillus anthracis	Bacillus	1386	Bacillus anthracis	1392	Bacillus	anthracis
GCF_000783215.1	Bacillus anthracis	Bacillus	1386	Bacillus anthracis	1392	Bacillus	anthracis
GCF_000021445.1	Bacillus anthracis	Bacillus	1386	Bacillus anthracis	1392	Bacillus	anthracis
GCF_001273045.1	Bacillus anthracis	Bacillus	1386	Bacillus anthracis	1392	Bacillus	anthracis
GCF_000319695.1	Bacillus anthracis	Bacillus	1386	Bacillus anthracis	1392	Bacillus	anthracis
GCF_000832505.1	Bacillus anthracis	Bacillus	1386	Bacillus anthracis	1392	Bacillus	anthracis
GCF_000783135.1	Bacillus anthracis	Bacillus	1386	Bacillus anthracis	1392	Bacillus	anthracis
GCF_000008165.1	Bacillus anthracis	Bacillus	1386	Bacillus anthracis	1392	Bacillus	anthracis
GCF_000832785.1	Bacillus anthracis	Bacillus	1386	Bacillus anthracis	1392	Bacillus	anthracis
GCF_000832565.1	Bacillus anthracis	Bacillus	1386	Bacillus anthracis	1392	Bacillus	anthracis
GCF_000783055.1	Bacillus anthracis	Bacillus	1386	Bacillus anthracis	1392	Bacillus	anthracis
GCF_000319715.1	Bacillus anthracis	Bacillus	1386	Bacillus anthracis	1392	Bacillus	anthracis
GCF_000258885.1	Bacillus anthracis	Bacillus	1386	Bacillus anthracis	1392	Bacillus	anthracis
GCF_000782955.1	Bacillus anthracis	Bacillus	1386	Bacillus anthracis	1392	Bacillus	anthracis
GCF_000782895.1	Bacillus anthracis	Bacillus	1386	Bacillus anthracis	1392	Bacillus	anthracis
GCF_000558965.1	Bacillus anthracis	Bacillus	1386	Bacillus anthracis	1392	Bacillus	anthracis
GCF_001273065.1	Bacillus anthracis	Bacillus	1386	Bacillus anthracis	1392	Bacillus	anthracis
GCF_000732465.1	Bacillus anthracis	Bacillus	1386	Bacillus anthracis	1392	Bacillus	anthracis
GCF_001273105.1	Bacillus anthracis	Bacillus	1386	Bacillus anthracis	1392	Bacillus	anthracis
GCF_000832665.1	Bacillus anthracis	Bacillus	1386	Bacillus anthracis	1392	Bacillus	anthracis
GCF_000743805.1	Bacillus anthracis	Bacillus	1386	Bacillus anthracis	1392	Bacillus	anthracis
GCF_000558985.1	Bacillus anthracis	Bacillus	1386	Bacillus anthracis	1392	Bacillus	anthracis
GCF_000833125.1	Bacillus anthracis	Bacillus	1386	Bacillus anthracis	1392	Bacillus	anthracis
GCF_000793545.1	Bacillus anthracis	Bacillus	1386	Bacillus anthracis	1392	Bacillus	anthracis
GCF_000830095.1	Bacillus anthracis	Bacillus	1386	Bacillus anthracis	1392	Bacillus	anthracis
GCF_000875715.1	Bacillus anthracis	Bacillus	1386	Bacillus anthracis	1392	Bacillus	anthracis
GCF_000742315.1	Bacillus anthracis	Bacillus	1386	Bacillus anthracis	1392	Bacillus	anthracis
[truncated: 46,225 more rows]
